# Supplementary material
Source: PubMed Central journal article supplement (PMC4633282)
Supplement: NIHMS726280-supplement-supplement_1.pdf [file NIHMS726280-supplement-supplement_1.pdf]

## Supplementary Tables

Supplementary Table 1. Country-specific burden of ischaemic stroke in 1990 (rates per 100,000 person-years and absolute numbers with 95% uncertainty intervals [UIs])

| Country              | Absolute numbers (95% UI) |                       |                          |                     | Rates (95% UI)        |                      |                          |                    |
|----------------------|---------------------------|-----------------------|--------------------------|---------------------|-----------------------|----------------------|--------------------------|--------------------|
|                      | Prevalence                | Deaths                | DALYs                    | YLDs                | Prevalence            | Deaths               | DALYs                    | YLDs               |
| Afghanistan          | 2168 (2575 - 1757)        | 2673 (3829 - 1620)    | 64201 (101799 - 35584)   | 335 (477 - 215)     | 55.5 (66.1 - 45.4)    | 123.8 (165.8 - 82.6) | 2068.5 (2889 - 1291)     | 8.2 (11.4 - 5.4)   |
| Angola               | 3396 (4022 - 2852)        | 2727 (3943 - 1723)    | 59552 (86597 - 36913)    | 517 (725 - 342)     | 82.5 (98.2 - 70)      | 110.2 (155.1 - 72.4) | 1716.6 (2471.6 - 1086.9) | 12.1 (16.8 - 8)    |
| Albania              | 2628 (3089 - 2228)        | 625 (714 - 514)       | 9926 (11513 - 8342)      | 397 (549 - 270)     | 122.6 (144.2 - 103.8) | 39.4 (45.2 - 32.1)   | 526.9 (607.4 - 437.2)    | 18.2 (25.2 - 12.5) |
| Andorra              | 366 (425 - 311)           | 34 (43 - 26)          | 361 (458 - 284)          | 52 (70 - 35)        | 535.2 (620.1 - 454.8) | 44.5 (56.8 - 33.9)   | 499.2 (634.5 - 391.1)    | 76 (103.4 - 51.1)  |
| United Arab Emirates | 399 (481 - 330)           | 221 (301 - 137)       | 4975 (7321 - 2912)       | 64 (91 - 42)        | 55.8 (64.2 - 48.1)    | 93.9 (121.5 - 59.7)  | 1282.5 (1705.8 - 805)    | 8.5 (11.5 - 5.7)   |
| Argentina            | 60263 (67891 - 54366)     | 18721 (21350 - 14179) | 298780 (345882 - 218233) | 8869 (11830 - 5997) | 204.7 (229.9 - 184.8) | 69.6 (79 - 52.7)     | 1035.2 (1194.7 - 762.7)  | 30 (39.9 - 20.4)   |
| Armenia              | 1430 (1680 - 1199)        | 1828 (2163 - 1537)    | 27050 (32741 - 22317)    | 220 (305 - 145)     | 53.2 (62.7 - 44.2)    | 89.4 (105.5 - 75.7)  | 1183.3 (1416 - 986)      | 8.1 (11.3 - 5.4)   |
| Antigua and Barbuda  | 127 (148 - 101)           | 46 (52 - 38)          | 699 (785 - 576)          | 18 (25 - 12)        | 265.3 (307.9 - 212.2) | 97.5 (110 - 79.4)    | 1448 (1629.5 - 1193.3)   | 38.1 (52.3 - 25.7) |

|                        |                        |                       |                          |                      |                       |                     |                          |                    |
|------------------------|------------------------|-----------------------|--------------------------|----------------------|-----------------------|---------------------|--------------------------|--------------------|
| Australia              | 62013 (69208 - 53164)  | 8273 (9258 - 7031)    | 94066 (105700 - 81915)   | 8960 (12189 - 6249)  | 344.5 (383.8 - 295.1) | 47.4 (53.1 - 40.2)  | 524.5 (587.6 - 456.9)    | 49.7 (67.6 - 34.7) |
| Austria                | 53780 (63630 - 44510)  | 7441 (8303 - 5909)    | 86807 (96451 - 71471)    | 7634 (10474 - 5180)  | 505.6 (595.6 - 420.7) | 61.7 (68.8 - 49.2)  | 763.7 (850 - 630.2)      | 72.4 (99.6 - 48.9) |
| Azerbaijan             | 2207 (2645 - 1843)     | 1730 (2215 - 1422)    | 31450 (40925 - 25680)    | 341 (474 - 230)      | 50.9 (61.4 - 42.3)    | 60 (76.4 - 49)      | 857.6 (1099.7 - 702.7)   | 7.7 (10.7 - 5.2)   |
| Burundi                | 1378 (1627 - 1155)     | 1414 (2316 - 172)     | 26387 (42886 - 3074)     | 217 (306 - 146)      | 56.3 (67.7 - 48)      | 91.7 (150.1 - 12)   | 1420.2 (2327 - 176.8)    | 8.7 (12.3 - 5.9)   |
| Belgium                | 68638 (77975 - 59871)  | 7333 (8261 - 5877)    | 87988 (98700 - 73840)    | 9629 (13117 - 6645)  | 495.9 (560 - 433)     | 48.1 (54.1 - 38.7)  | 605.8 (677.9 - 509.4)    | 70.1 (95.6 - 48.5) |
| Benin                  | 1979 (2301 - 1706)     | 985 (1256 - 611)      | 20057 (25502 - 12313)    | 299 (414 - 199)      | 88.2 (102.6 - 76)     | 65.9 (85.6 - 41.3)  | 1004.7 (1279.4 - 620.4)  | 13 (17.9 - 8.8)    |
| Burkina Faso           | 3431 (4021 - 2943)     | 810 (1082 - 491)      | 18100 (24399 - 10486)    | 517 (724 - 340)      | 90.3 (106 - 77.9)     | 29.2 (39.4 - 17.6)  | 514.3 (683.7 - 311.2)    | 13.3 (18.4 - 8.8)  |
| Bangladesh             | 95206 (111366 - 81811) | 25730 (33331 - 14723) | 450592 (596285 - 264528) | 14062 (18875 - 9590) | 182.9 (216.3 - 154.3) | 70.4 (90.5 - 41)    | 1034.3 (1347.7 - 605.1)  | 26.5 (35.8 - 17.9) |
| Bulgaria               | 13890 (16659 - 11554)  | 16145 (17924 - 14401) | 222856 (248705 - 195822) | 2056 (2872 - 1397)   | 125.5 (149.1 - 105)   | 157.6 (175.1 - 141) | 2059.5 (2290.2 - 1818.5) | 18.6 (25.6 - 12.6) |
| Bahrain                | 122 (143 - 101)        | 66 (101 - 51)         | 1273 (2040 - 954)        | 19 (26 - 13)         | 56.2 (67.2 - 47.5)    | 61.6 (90.8 - 48.3)  | 860.3 (1291.9 - 668.3)   | 8.4 (11.7 - 5.7)   |
| The Bahamas            | 340 (395 - 296)        | 104 (117 - 89)        | 1896 (2132 - 1627)       | 50 (69 - 34)         | 270.5 (320.1 - 233.5) | 96.4 (108.6 - 80.9) | 1470.2 (1650.1 - 1259.7) | 38.8 (53.7 - 26.5) |
| Bosnia and Herzegovina | 4415 (5064 - 3773)     | 2485 (2989 - 2226)    | 35986 (43584 - 32008)    | 672 (926 - 452)      | 113.1 (129.4 - 97)    | 91.9 (109.8 - 82.1) | 1156.8 (1394.3 - 1037.4) | 17 (23.6 - 11.7)   |

|                          |                          |                       |                          |                       |                       |                      |                          |                      |
|--------------------------|--------------------------|-----------------------|--------------------------|-----------------------|-----------------------|----------------------|--------------------------|----------------------|
| Belarus                  | 23087 (26919 - 19414)    | 12070 (14231 - 10547) | 180061 (219533 - 153864) | 3479 (4795 - 2332)    | 203 (235.9 - 171.5)   | 109 (128.2 - 95.6)   | 1590.5 (1928.3 - 1369.2) | 30.7 (42.4 - 20.6)   |
| Belize                   | 226 (276 - 190)          | 56 (65 - 49)          | 966 (1108 - 819)         | 33 (46 - 22)          | 274.5 (339.8 - 227.9) | 71.4 (82.3 - 61.7)   | 1093.4 (1258.5 - 928.1)  | 39.3 (56.2 - 26.5)   |
| Bolivia                  | 2793 (3292 - 2413)       | 1060 (1242 - 886)     | 23705 (28340 - 19097)    | 426 (595 - 282)       | 86.4 (101 - 74.5)     | 44.7 (52.7 - 36.9)   | 717.9 (842.1 - 596.4)    | 12.9 (17.8 - 8.7)    |
| Brazil                   | 164161 (189435 - 136162) | 49146 (54390 - 40879) | 830627 (922021 - 681648) | 24401 (33788 - 15986) | 200.5 (233.1 - 165.8) | 78.9 (87.2 - 65.3)   | 1131.1 (1251.3 - 945.3)  | 29.4 (40.9 - 19.4)   |
| Barbados                 | 647 (743 - 551)          | 232 (262 - 195)       | 3059 (3443 - 2617)       | 92 (125 - 63)         | 261.7 (299.3 - 224.4) | 89.8 (101.3 - 75.3)  | 1225.7 (1379.8 - 1051.9) | 37.6 (50.4 - 25.4)   |
| Brunei                   | 474 (553 - 411)          | 55 (66 - 44)          | 932 (1166 - 707)         | 71 (98 - 47)          | 543.4 (647.8 - 458)   | 80.5 (96.5 - 65.7)   | 1104.9 (1342 - 877.1)    | 79.1 (111.4 - 53)    |
| Bhutan                   | 464 (541 - 389)          | 95 (143 - 56)         | 1931 (2987 - 1112)       | 69 (96 - 46)          | 183.2 (214.9 - 152.6) | 67 (96.3 - 41.3)     | 984.8 (1465.6 - 591.1)   | 26.8 (37.2 - 17.9)   |
| Botswana                 | 691 (799 - 582)          | 151 (236 - 90)        | 2747 (4613 - 1523)       | 104 (142 - 69)        | 127.2 (147 - 105.7)   | 49.1 (72.3 - 30.3)   | 681.5 (1062.5 - 404.9)   | 18.6 (25.4 - 12.5)   |
| Central African Republic | 1307 (1508 - 1133)       | 1151 (1475 - 726)     | 22181 (29917 - 13661)    | 195 (267 - 132)       | 85.6 (98.8 - 74.4)    | 107.3 (136.7 - 67.6) | 1667.1 (2147.7 - 1045.8) | 12.6 (17.2 - 8.5)    |
| Canada                   | 226464 (269565 - 195305) | 8766 (10298 - 7464)   | 126067 (147102 - 109888) | 32361 (46012 - 22091) | 764.2 (910.6 - 659.4) | 29.8 (35.1 - 25.4)   | 424 (494.2 - 369.8)      | 109.2 (154.9 - 74.7) |
| Switzerland              | 48373 (57479 - 40045)    | 4601 (5411 - 3641)    | 51251 (60594 - 41731)    | 6649 (9003 - 4396)    | 521.1 (614.1 - 435.4) | 43.1 (51 - 34.3)     | 513.5 (603.2 - 416.2)    | 72.4 (98 - 48.2)     |

|                                  |                             |                          |                             |                          |                       |                      |                          |                    |
|----------------------------------|-----------------------------|--------------------------|-----------------------------|--------------------------|-----------------------|----------------------|--------------------------|--------------------|
| Chile                            | 15886 (18010 - 14096)       | 5405 (6095 - 4304)       | 83398 (94785 - 65214)       | 2372 (3219 - 1614)       | 176.3 (201.1 - 155.8) | 69.8 (78.4 - 55.9)   | 988.9 (1121.2 - 780.2)   | 26.1 (35.6 - 17.7) |
| China                            | 1214609 (1267332 - 1155900) | 317792 (410202 - 274000) | 5622115 (7127921 - 4761928) | 181810 (241933 - 126595) | 169.9 (177 - 161.8)   | 51.6 (66.9 - 44.6)   | 786.9 (1000.4 - 672.9)   | 25.2 (33.3 - 17.6) |
| Cote d'Ivoire                    | 5004 (5818 - 4321)          | 3109 (3974 - 2452)       | 69480 (91628 - 52934)       | 755 (1044 - 505)         | 93.2 (109 - 80.4)     | 94.2 (119.7 - 77.3)  | 1509.8 (1919.8 - 1193.7) | 13.6 (18.5 - 9.3)  |
| Cameroon                         | 5035 (5917 - 4288)          | 3417 (4345 - 2754)       | 67056 (88002 - 52194)       | 757 (1045 - 516)         | 89.2 (105.3 - 75.1)   | 86.9 (110.4 - 70.7)  | 1343.3 (1693.8 - 1076.8) | 13.1 (18.1 - 9.1)  |
| Democratic Republic of the Congo | 12748 (15072 - 10618)       | 8439 (10919 - 5395)      | 171564 (223633 - 112125)    | 1911 (2656 - 1248)       | 83.3 (98.1 - 69.8)    | 93.5 (122.6 - 60.4)  | 1370.2 (1773.7 - 873.5)  | 12.1 (16.8 - 7.9)  |
| Congo                            | 996 (1135 - 865)            | 1218 (1447 - 867)        | 22239 (27116 - 14951)       | 151 (205 - 102)          | 86.4 (99.5 - 74.9)    | 150 (178.7 - 109.3)  | 2291.1 (2740.6 - 1614.9) | 12.8 (17.6 - 8.7)  |
| Colombia                         | 6600 (8020 - 5418)          | 4253 (4816 - 3227)       | 75437 (85191 - 58368)       | 984 (1380 - 647)         | 41.8 (51 - 34.4)      | 32.1 (36.4 - 23.9)   | 469 (529.7 - 365.4)      | 6.1 (8.6 - 4.1)    |
| Comoros                          | 106 (124 - 85)              | 130 (195 - 49)           | 2386 (3719 - 848)           | 17 (23 - 11)             | 55.5 (64.4 - 43.5)    | 111.7 (163.7 - 42.6) | 1653.4 (2500.1 - 616)    | 8.4 (11.7 - 5.5)   |
| Cape Verde                       | 166 (192 - 140)             | 190 (229 - 151)          | 2980 (3688 - 2321)          | 25 (34 - 17)             | 88.2 (102.3 - 74.4)   | 116.4 (140.7 - 92.9) | 1630.1 (2003.5 - 1271.4) | 13.2 (18 - 8.9)    |
| Costa Rica                       | 716 (867 - 567)             | 567 (677 - 376)          | 8094 (9704 - 5300)          | 108 (153 - 70)           | 43.4 (52.9 - 33.9)    | 39 (46.6 - 25.8)     | 494.6 (590.9 - 326.2)    | 6.5 (9.2 - 4.2)    |
| Cuba                             | 24860 (29675 - 20641)       | 6443 (7475 - 5717)       | 91138 (104082 - 79538)      | 3563 (4956 - 2409)       | 266.3 (316.8 - 221.1) | 68.1 (78.9 - 60.4)   | 975.8 (1113.7 - 850.5)   | 38.2 (53.2 - 25.9) |

|                    |                          |                       |                           |                        |                       |                       |                          |                    |
|--------------------|--------------------------|-----------------------|---------------------------|------------------------|-----------------------|-----------------------|--------------------------|--------------------|
| Cyprus             | 3382 (3865 - 2922)       | 449 (541 - 298)       | 5007 (5853 - 3555)        | 476 (650 - 325)        | 512.6 (585.9 - 444.3) | 64.4 (77.7 - 43.2)    | 743.9 (870.1 - 528.5)    | 72.3 (98.4 - 49.4) |
| Czech Republic     | 15451 (18628 - 13270)    | 22073 (24075 - 19579) | 277158 (305296 - 247253)  | 2279 (3202 - 1529)     | 128.1 (154.3 - 110.1) | 181.6 (197.7 - 160.9) | 2253.6 (2481.4 - 2008)   | 18.9 (26.5 - 12.6) |
| Germany            | 638558 (727595 - 566008) | 83109 (92618 - 65983) | 969080 (1070096 - 804862) | 89680 (120738 - 62291) | 560.9 (636.9 - 500.1) | 64.7 (72.1 - 51.6)    | 799.8 (885.5 - 668.5)    | 79.3 (107.1 - 55)  |
| Djibouti           | 143 (175 - 118)          | 168 (259 - 107)       | 3232 (5239 - 1945)        | 23 (32 - 15)           | 55.3 (68.7 - 45.6)    | 123.4 (179.8 - 82.1)  | 1794.9 (2762.7 - 1137.5) | 8.5 (11.8 - 5.6)   |
| Dominica           | 117 (142 - 94)           | 37 (44 - 32)          | 610 (713 - 531)           | 17 (23 - 11)           | 261.2 (315.4 - 208.4) | 85.8 (101.2 - 74.7)   | 1335.4 (1565.3 - 1159.6) | 36.9 (51.5 - 24.3) |
| Denmark            | 47866 (54062 - 41503)    | 3720 (4511 - 3205)    | 47553 (57546 - 41884)     | 6773 (9159 - 4725)     | 654.7 (734.7 - 572.2) | 44.8 (54.5 - 38.7)    | 613.6 (744.6 - 540.3)    | 93.5 (126 - 64.8)  |
| Dominican Republic | 9126 (10354 - 8022)      | 1742 (1959 - 1430)    | 33172 (37510 - 26563)     | 1340 (1833 - 922)      | 290 (331.5 - 254.2)   | 65.7 (73.9 - 54.2)    | 999.6 (1123.3 - 821.1)   | 41.7 (56.5 - 28.4) |
| Algeria            | 6545 (7582 - 5707)       | 6508 (7838 - 5555)    | 104996 (131084 - 88709)   | 1011 (1390 - 686)      | 56.6 (65.9 - 49.4)    | 88.9 (105.3 - 76.3)   | 1161.4 (1409.6 - 986.5)  | 8.6 (11.7 - 5.8)   |
| Ecuador            | 4142 (4874 - 3424)       | 1834 (2060 - 1435)    | 33867 (38420 - 25572)     | 635 (872 - 418)        | 79 (93.3 - 65)        | 42.4 (47.7 - 33.4)    | 649 (733.7 - 498.2)      | 11.9 (16.4 - 7.8)  |
| Egypt              | 18846 (21712 - 15289)    | 28298 (32048 - 23648) | 544642 (635442 - 449486)  | 2876 (3963 - 1905)     | 56.9 (65.4 - 45.8)    | 115.7 (130.9 - 95.7)  | 1740.6 (1983.8 - 1462.1) | 8.5 (11.7 - 5.7)   |
| Eritrea            | 665 (813 - 540)          | 438 (644 - 197)       | 9492 (13957 - 4432)       | 105 (147 - 69)         | 53.3 (62.3 - 44.3)    | 88 (128.3 - 37.2)     | 1328.6 (1919.1 - 587.3)  | 8.1 (11.1 - 5.4)   |

|                                |                          |                       |                          |                       |                       |                      |                          |                     |
|--------------------------------|--------------------------|-----------------------|--------------------------|-----------------------|-----------------------|----------------------|--------------------------|---------------------|
| Spain                          | 265674 (293995 - 239296) | 30436 (33960 - 24421) | 359015 (397323 - 301246) | 37473 (49547 - 25970) | 527.7 (583.3 - 476)   | 58 (64.7 - 46.5)     | 696.4 (771.1 - 585.5)    | 74.7 (98.8 - 51.8)  |
| Estonia                        | 4503 (5159 - 3815)       | 2470 (2719 - 2024)    | 33345 (37273 - 27406)    | 682 (931 - 460)       | 247.5 (284.7 - 210.1) | 133.7 (147 - 109.6)  | 1799.5 (2011.5 - 1480.7) | 37.6 (51.4 - 25.4)  |
| Ethiopia                       | 6826 (7720 - 6002)       | 12385 (16484 - 6861)  | 235568 (320546 - 129218) | 1117 (1534 - 757)     | 31.3 (35.7 - 27.4)    | 89 (119.7 - 50.3)    | 1381.6 (1848.6 - 764.8)  | 5 (6.8 - 3.4)       |
| Finland                        | 36636 (41358 - 31669)    | 4285 (4819 - 3593)    | 54841 (61422 - 47501)    | 5159 (6965 - 3526)    | 576 (649.4 - 497.6)   | 65.4 (73.6 - 54.8)   | 843.9 (946.4 - 732.1)    | 81.4 (109.7 - 55.3) |
| Fiji                           | 419 (480 - 366)          | 203 (295 - 127)       | 4564 (7047 - 2805)       | 63 (85 - 43)          | 157.1 (178.6 - 137.2) | 93.1 (128.6 - 58.9)  | 1526.5 (2227.7 - 956.6)  | 22.8 (30.7 - 15.6)  |
| France                         | 349595 (404310 - 296335) | 31042 (34953 - 25041) | 350097 (392057 - 301968) | 49906 (68905 - 34733) | 467.4 (536.8 - 399.4) | 35 (39.3 - 28.6)     | 434.1 (486.7 - 377)      | 67.4 (92.1 - 47.2)  |
| Federated States of Micronesia | 54 (64 - 45)             | 24 (34 - 15)          | 500 (743 - 304)          | 8 (12 - 5)            | 148.1 (175.2 - 122)   | 74.2 (102.1 - 49.7)  | 1259.5 (1804.2 - 791.1)  | 21.8 (31 - 14.5)    |
| Gabon                          | 541 (625 - 452)          | 644 (787 - 413)       | 10967 (13570 - 6863)     | 81 (111 - 53)         | 86.6 (100.4 - 72.8)   | 128.4 (156.7 - 83.5) | 1905.7 (2337.3 - 1205.5) | 12.8 (17.6 - 8.5)   |
| United Kingdom                 | 414196 (439225 - 391071) | 48429 (53163 - 39939) | 585541 (645219 - 496562) | 58674 (78170 - 40973) | 505.7 (534.7 - 478.8) | 52.9 (58.1 - 43.6)   | 672 (742 - 573.2)        | 72.2 (96.3 - 50.3)  |
| Georgia                        | 3092 (3732 - 2596)       | 5436 (6434 - 4210)    | 80684 (97984 - 62575)    | 472 (672 - 317)       | 54.6 (65.9 - 45.7)    | 109 (128.7 - 84.4)   | 1507.7 (1825.5 - 1170.5) | 8.3 (11.8 - 5.6)    |
| Ghana                          | 5617 (6666 - 4571)       | 2292 (3778 - 1592)    | 48677 (79517 - 33507)    | 861 (1221 - 565)      | 90 (106.3 - 72.6)     | 62.9 (104.4 - 43.9)  | 967.6 (1581.7 - 679.1)   | 13.4 (18.9 - 8.7)   |

|                                                  |                       |                      |                          |                      |                       |                      |                          |                     |
|--------------------------------------------------|-----------------------|----------------------|--------------------------|----------------------|-----------------------|----------------------|--------------------------|---------------------|
| Guinea                                           | 2597 (3112 - 2192)    | 1264 (1606 - 820)    | 28081 (36586 - 17729)    | 395 (553 - 256)      | 87.4 (105.3 - 74.2)   | 67.7 (86.8 - 44.1)   | 1065.3 (1349.2 - 692.9)  | 13 (18.3 - 8.5)     |
| The Gambia                                       | 324 (400 - 266)       | 161 (248 - 100)      | 3372 (5230 - 1997)       | 50 (70 - 33)         | 93.2 (116.4 - 77.5)   | 73.9 (108.1 - 49)    | 1136 (1745.3 - 699.6)    | 13.9 (19.8 - 9.2)   |
| Guinea-Bissau                                    | 428 (495 - 370)       | 277 (447 - 175)      | 6095 (10137 - 3711)      | 64 (89 - 43)         | 91 (105.8 - 77)       | 88.2 (133.6 - 58.3)  | 1431.8 (2293.1 - 908.9)  | 13.3 (18.2 - 9.1)   |
| Equatorial Guinea                                | 166 (196 - 138)       | 181 (251 - 114)      | 3431 (4914 - 2076)       | 25 (35 - 17)         | 83.4 (98.9 - 69.4)    | 122 (166.9 - 76.3)   | 1918.5 (2715.6 - 1206.9) | 12.4 (17 - 8.5)     |
| Greece                                           | 72277 (82054 - 64010) | 11882 (13100 - 9884) | 137286 (151148 - 117213) | 10198 (13769 - 6924) | 524.3 (595.1 - 464.4) | 84.1 (92.7 - 70)     | 977.6 (1074.8 - 834.5)   | 74.5 (100.6 - 50.5) |
| Grenada                                          | 183 (210 - 161)       | 71 (79 - 59)         | 1173 (1306 - 968)        | 26 (36 - 18)         | 265.3 (304.7 - 232.9) | 106.8 (118.9 - 87.8) | 1644.6 (1829.3 - 1367.4) | 38 (52.3 - 26.3)    |
| Guatemala                                        | 1461 (1702 - 1239)    | 908 (1078 - 734)     | 19378 (23222 - 15508)    | 207 (284 - 142)      | 40.1 (46.9 - 33.5)    | 31.5 (37.5 - 25.4)   | 492.2 (584.6 - 399.6)    | 5.6 (7.5 - 3.9)     |
| Guyana                                           | 1040 (1216 - 883)     | 570 (639 - 442)      | 10289 (11614 - 7798)     | 150 (208 - 102)      | 277.2 (326 - 233.9)   | 157.7 (177 - 122.5)  | 2709.3 (3061.1 - 2052.2) | 39.6 (55.3 - 26.8)  |
| Hong Kong Special Administrative Region of China | 11895 (14293 - 9446)  | 2048 (2320 - 1666)   | 29050 (32832 - 24214)    | 1778 (2474 - 1163)   | 235.1 (283.3 - 187.5) | 46.9 (53.1 - 37.9)   | 602 (678.4 - 498.2)      | 34.9 (48.4 - 22.8)  |
| Honduras                                         | 856 (1050 - 680)      | 1073 (1383 - 914)    | 23310 (31431 - 19180)    | 128 (184 - 83)       | 45.1 (55.5 - 35)      | 64.1 (81.5 - 54.6)   | 1020.4 (1338.5 - 858.2)  | 6.6 (9.4 - 4.3)     |

|           |                          |                          |                             |                         |                       |                       |                          |                     |
|-----------|--------------------------|--------------------------|-----------------------------|-------------------------|-----------------------|-----------------------|--------------------------|---------------------|
| Croatia   | 7705 (9454 - 6514)       | 6980 (7852 - 6240)       | 90397 (101705 - 80774)      | 1150 (1604 - 757)       | 134.7 (164.5 - 114.5) | 133.3 (150.1 - 119.3) | 1664.2 (1871 - 1492.4)   | 20.1 (28 - 13.2)    |
| Haiti     | 8326 (9757 - 6853)       | 3599 (4251 - 2800)       | 81007 (96366 - 62187)       | 1212 (1683 - 832)       | 273.7 (324.3 - 228.1) | 128.6 (150.2 - 101.7) | 2287.4 (2700.5 - 1787.1) | 39 (54.1 - 26.6)    |
| Hungary   | 18839 (21748 - 15821)    | 16243 (18412 - 14649)    | 230650 (261247 - 205632)    | 2784 (3753 - 1837)      | 145.3 (166.4 - 122.6) | 124 (140.8 - 111.5)   | 1737.4 (1970.9 - 1551.3) | 21.6 (29.1 - 14.2)  |
| Indonesia | 137163 (158370 - 117772) | 57405 (69455 - 47052)    | 1045062 (1292804 - 849323)  | 20520 (28172 - 13671)   | 171.8 (201.9 - 144)   | 94.2 (113.2 - 76.8)   | 1353.6 (1643.5 - 1112.2) | 25.1 (34.8 - 16.7)  |
| India     | 864666 (964204 - 772062) | 179734 (223609 - 131090) | 3603656 (4599668 - 2639063) | 128030 (173851 - 88056) | 175.8 (197.4 - 156.2) | 56.6 (69.6 - 41.6)    | 888.5 (1106.7 - 649.3)   | 25.6 (34.7 - 17.8)  |
| Ireland   | 19801 (22639 - 16639)    | 1891 (2134 - 1556)       | 24699 (27736 - 20945)       | 2824 (3840 - 1867)      | 529.1 (602.9 - 444.7) | 49.7 (56.2 - 41)      | 644 (724.1 - 544.7)      | 75.7 (103.1 - 50)   |
| Iran      | 14107 (16990 - 11849)    | 11430 (13844 - 9511)     | 221815 (281609 - 175014)    | 2169 (3066 - 1436)      | 51.9 (62.2 - 43)      | 74.6 (88.4 - 63.7)    | 1035.5 (1262.7 - 858.7)  | 7.8 (11 - 5.2)      |
| Iraq      | 4398 (5264 - 3662)       | 6351 (7641 - 5252)       | 106416 (130889 - 85144)     | 672 (942 - 439)         | 54.2 (65.4 - 45.2)    | 103.5 (123 - 86.1)    | 1483.1 (1811.6 - 1198.4) | 8.1 (11.3 - 5.4)    |
| Iceland   | 1379 (1603 - 1162)       | 101 (122 - 88)           | 1250 (1451 - 1096)          | 195 (264 - 134)         | 529.9 (614.7 - 447.1) | 36.3 (43.7 - 31.4)    | 465.9 (540.7 - 408.8)    | 75.3 (102.4 - 51.5) |
| Israel    | 15422 (17633 - 12768)    | 1579 (1848 - 1344)       | 21794 (25247 - 18798)       | 2197 (2992 - 1472)      | 399.4 (457.2 - 328.6) | 41.1 (48.2 - 35)      | 560.3 (646.7 - 482.7)    | 56.8 (77.5 - 38)    |
| Italy     | 310365 (356265 - 264362) | 50000 (55259 - 41530)    | 577687 (638138 - 490458)    | 43999 (59718 - 30514)   | 384.3 (440.6 - 328.2) | 58.5 (64.7 - 48.6)    | 693.1 (765.6 - 587.5)    | 54.8 (75 - 38)      |



|             |                          |                       |                           |                         |                       |                       |                          |                    |
|-------------|--------------------------|-----------------------|---------------------------|-------------------------|-----------------------|-----------------------|--------------------------|--------------------|
| Jamaica     | 4445 (5187 - 3662)       | 1616 (1832 - 1419)    | 22015 (24852 - 19166)     | 641 (871 - 433)         | 266.2 (310.6 - 219.3) | 93.1 (105.6 - 81.7)   | 1294.8 (1460.2 - 1127.9) | 38.4 (52 - 26.1)   |
| Jordan      | 800 (910 - 676)          | 1274 (1523 - 1074)    | 19781 (24397 - 16465)     | 123 (168 - 84)          | 56.1 (63.9 - 46.8)    | 119.8 (142.3 - 101.5) | 1633 (1988.2 - 1363.7)   | 8.4 (11.5 - 5.8)   |
| Japan       | 703205 (810552 - 601981) | 82291 (90340 - 70345) | 973476 (1072229 - 841171) | 103182 (141523 - 71665) | 474.3 (545.5 - 406.3) | 59.3 (65.1 - 50.6)    | 674.5 (742 - 582.6)      | 69.5 (95.4 - 48.1) |
| Kazakhstan  | 6757 (7947 - 5830)       | 13139 (15231 - 11589) | 206173 (242099 - 178871)  | 1036 (1455 - 700)       | 58 (68.4 - 49.6)      | 137.2 (158.7 - 121.4) | 1943.5 (2278.9 - 1703.7) | 8.8 (12.3 - 6)     |
| Kenya       | 5139 (6200 - 4267)       | 2989 (3984 - 1630)    | 47170 (63060 - 25654)     | 812 (1155 - 529)        | 56 (69.7 - 45.5)      | 53.6 (72 - 29.5)      | 712.8 (948.1 - 388.9)    | 8.6 (12.4 - 5.6)   |
| Kyrgyzstan  | 1528 (1775 - 1274)       | 3549 (4154 - 3154)    | 55277 (67303 - 48087)     | 234 (331 - 151)         | 56.1 (65.6 - 46.6)    | 160.3 (186 - 142.8)   | 2260.6 (2702 - 1981.1)   | 8.5 (12 - 5.5)     |
| Cambodia    | 6014 (7104 - 5113)       | 2488 (3203 - 1860)    | 51094 (67483 - 37019)     | 740 (1023 - 498)        | 177.4 (209.1 - 148.2) | 90.7 (115.1 - 68.2)   | 1409.7 (1818.5 - 1048.9) | 21 (28.9 - 13.9)   |
| Kiribati    | 42 (49 - 35)             | 19 (23 - 15)          | 465 (584 - 364)           | 6 (9 - 4)               | 147.8 (174.1 - 119.4) | 69.5 (85.2 - 56.2)    | 1343.4 (1683.6 - 1065.2) | 21.6 (29.7 - 14.2) |
| South Korea | 125277 (144182 - 107185) | 21666 (25877 - 19497) | 375398 (446577 - 329239)  | 18421 (24786 - 12524)   | 506.5 (591.5 - 428.8) | 114.2 (136.4 - 102.5) | 1636.6 (1941.3 - 1461)   | 73.1 (98.7 - 49.4) |
| Kuwait      | 484 (567 - 407)          | 174 (219 - 146)       | 3754 (4769 - 3083)        | 76 (108 - 50)           | 55.8 (67.9 - 45.1)    | 55.3 (70.1 - 46.9)    | 695.7 (866.1 - 588.2)    | 8.4 (11.9 - 5.6)   |
| Laos        | 2827 (3249 - 2384)       | 1216 (1941 - 759)     | 25707 (41328 - 15454)     | 415 (574 - 276)         | 167.9 (192.2 - 141.3) | 89.3 (138.8 - 58.6)   | 1410.5 (2259.9 - 876.6)  | 24.1 (32.7 - 16.2) |

|                                              |                       |                    |                        |                    |                       |                       |                          |                    |
|----------------------------------------------|-----------------------|--------------------|------------------------|--------------------|-----------------------|-----------------------|--------------------------|--------------------|
| Lebanon                                      | 1012 (1167 - 855)     | 793 (1035 - 533)   | 12457 (16666 - 7893)   | 147 (198 - 100)    | 53.7 (62.1 - 45.8)    | 56.8 (73.6 - 38.6)    | 750.6 (986.4 - 492.6)    | 7.7 (10.4 - 5.3)   |
| Liberia                                      | 873 (1020 - 739)      | 439 (564 - 361)    | 10228 (13920 - 8162)   | 130 (186 - 87)     | 93.8 (110.8 - 78.9)   | 78.8 (101.1 - 65.1)   | 1219.8 (1565 - 1002.5)   | 13.6 (19.2 - 9.2)  |
| Libya                                        | 275 (350 - 214)       | 817 (1000 - 650)   | 16353 (21222 - 12315)  | 45 (66 - 28)       | 13.9 (18 - 10.7)      | 73.4 (88.9 - 59.4)    | 961.2 (1180.8 - 760.5)   | 2.2 (3.3 - 1.4)    |
| Saint Lucia                                  | 265 (307 - 226)       | 100 (113 - 87)     | 1633 (1836 - 1427)     | 38 (52 - 26)       | 279.1 (320.4 - 238.3) | 107.8 (122.5 - 93.9)  | 1656.9 (1862.8 - 1445.7) | 40 (54.7 - 27.3)   |
| Sri Lanka                                    | 18621 (21554 - 15802) | 3907 (4598 - 3403) | 76077 (88687 - 66742)  | 2766 (3813 - 1881) | 185.3 (216.1 - 156.4) | 43.4 (50.9 - 37.4)    | 701.5 (821.7 - 617.5)    | 27.1 (37.1 - 18.5) |
| Lesotho                                      | 1069 (1218 - 894)     | 324 (438 - 215)    | 5920 (8141 - 3849)     | 159 (219 - 107)    | 131.4 (151.2 - 109.2) | 53.7 (72 - 35.6)      | 823.4 (1115.2 - 540.9)   | 19.3 (26.6 - 13)   |
| Lithuania                                    | 6598 (7766 - 5579)    | 3547 (4339 - 3145) | 48224 (58355 - 42800)  | 994 (1376 - 675)   | 161.5 (190.6 - 137)   | 85.2 (103.9 - 75.8)   | 1176.5 (1421 - 1045.2)   | 24.3 (33.8 - 16.6) |
| Luxembourg                                   | 2471 (2873 - 2124)    | 366 (415 - 275)    | 4505 (5056 - 3520)     | 350 (479 - 239)    | 498 (578.4 - 429.8)   | 71.1 (80.6 - 53.4)    | 888.1 (999.1 - 693.5)    | 70.8 (96.9 - 48.5) |
| Latvia                                       | 6079 (7073 - 5180)    | 4627 (5356 - 4101) | 59844 (69298 - 52315)  | 919 (1246 - 604)   | 194.2 (225.6 - 165.9) | 142.9 (165.7 - 126.8) | 1858.9 (2151 - 1626.3)   | 29.4 (40 - 19.4)   |
| Macao Special Administrative Region of China | 464 (564 - 379)       | 127 (160 - 106)    | 1798 (2244 - 1531)     | 69 (96 - 46)       | 188.1 (230.3 - 153.2) | 55.2 (69.3 - 46)      | 750.3 (933.3 - 639.9)    | 27.7 (38.9 - 18.5) |
| Morocco                                      | 6599 (7739 - 5701)    | 5013 (5777 - 4062) | 95444 (113769 - 78810) | 1019 (1417 - 670)  | 55.3 (64.9 - 47.7)    | 68.8 (79.4 - 55)      | 961.2 (1110 - 783.8)     | 8.4 (11.7 - 5.5)   |

|                  |                       |                       |                          |                    |                       |                       |                          |                    |
|------------------|-----------------------|-----------------------|--------------------------|--------------------|-----------------------|-----------------------|--------------------------|--------------------|
| Moldova          | 8080 (9424 - 6899)    | 3260 (3881 - 2835)    | 52590 (65310 - 46195)    | 1228 (1724 - 816)  | 198.9 (230.1 - 168.6) | 99.9 (118 - 85.8)     | 1439.7 (1752.7 - 1264)   | 30.1 (42.1 - 20.1) |
| Madagascar       | 3147 (3790 - 2490)    | 5727 (7080 - 3913)    | 111358 (138944 - 74523)  | 484 (682 - 314)    | 60.2 (73 - 46.6)      | 171.8 (213.4 - 117.9) | 2649.7 (3278.6 - 1787.7) | 9.1 (12.9 - 5.9)   |
| Maldives         | 137 (163 - 114)       | 62 (81 - 40)          | 1303 (1807 - 771)        | 20 (29 - 14)       | 175.2 (208.2 - 146.4) | 116.2 (147.1 - 81.6)  | 1684.1 (2193.4 - 1116.4) | 25.5 (35.2 - 17.1) |
| Mexico           | 16290 (17038 - 15546) | 7776 (8948 - 6382)    | 130818 (149142 - 108175) | 2469 (3301 - 1710) | 39.2 (41.1 - 37.3)    | 21.3 (24.4 - 17.6)    | 307.8 (353 - 253.1)      | 5.9 (7.8 - 4.1)    |
| Marshall Islands | 24 (28 - 21)          | 8 (10 - 5)            | 186 (252 - 118)          | 4 (5 - 2)          | 162 (191.1 - 136.4)   | 66.2 (83.4 - 48.8)    | 1106.5 (1428.7 - 752)    | 23.7 (32.7 - 15.7) |
| Macedonia        | 2264 (2693 - 1901)    | 2596 (2787 - 2395)    | 34903 (38008 - 31875)    | 341 (470 - 225)    | 128.7 (152.6 - 108.4) | 204.8 (219.7 - 189.3) | 2447.5 (2641.3 - 2256.2) | 19.2 (26.1 - 12.7) |
| Mali             | 3607 (4064 - 3171)    | 1987 (2442 - 1421)    | 42761 (53903 - 30615)    | 544 (741 - 369)    | 92.5 (104.4 - 81.2)   | 71.9 (88.1 - 50.8)    | 1168.9 (1440.5 - 831)    | 13.7 (18.5 - 9.4)  |
| Malta            | 1684 (1928 - 1405)    | 158 (190 - 138)       | 2107 (2495 - 1857)       | 240 (321 - 164)    | 488.2 (561.2 - 404.1) | 48.3 (58.1 - 42.2)    | 624.5 (738.1 - 551.3)    | 69.3 (93 - 47.4)   |
| Myanmar          | 32437 (37972 - 27387) | 18731 (28580 - 10464) | 341938 (543430 - 184267) | 4720 (6509 - 3181) | 165 (196.2 - 136.1)   | 121 (177.2 - 69.2)    | 1798.1 (2759.5 - 1000.2) | 23.5 (32.4 - 15.8) |
| Montenegro       | 717 (842 - 608)       | 195 (333 - 134)       | 2860 (4833 - 1911)       | 107 (146 - 73)     | 125.6 (148.7 - 106.4) | 36 (61.1 - 24.7)      | 517.4 (873.1 - 346.5)    | 18.7 (25.3 - 12.9) |
| Mongolia         | 557 (646 - 463)       | 285 (380 - 220)       | 5500 (7382 - 4298)       | 86 (118 - 57)      | 51 (59.2 - 42.5)      | 35.3 (47.2 - 27.3)    | 538.5 (714.7 - 419.6)    | 7.8 (10.8 - 5.1)   |
| Mozambique       | 3518 (4203 - 2929)    | 1749 (2403 - 997)     | 34304 (47025 - 19836)    | 543 (764 - 362)    | 55 (65.7 - 46.4)      | 43.6 (60.5 - 24.2)    | 669 (919.9 - 382.1)      | 8.3 (11.6 - 5.6)   |

|             |                       |                       |                          |                      |                       |                       |                          |                    |
|-------------|-----------------------|-----------------------|--------------------------|----------------------|-----------------------|-----------------------|--------------------------|--------------------|
| Mauritania  | 805 (935 - 690)       | 446 (556 - 356)       | 9039 (11435 - 7043)      | 122 (167 - 81)       | 90.7 (105.4 - 77.7)   | 78.6 (98.4 - 62.9)    | 1224.4 (1524.7 - 974.8)  | 13.4 (18.3 - 9)    |
| Mauritius   | 937 (1075 - 810)      | 581 (695 - 521)       | 10206 (12241 - 9067)     | 140 (193 - 94)       | 170.1 (195.8 - 146.1) | 133.7 (161.5 - 119.9) | 1940.8 (2311.8 - 1735.9) | 25 (34.3 - 17)     |
| Malawi      | 2148 (2583 - 1836)    | 927 (1340 - 390)      | 17766 (25038 - 7661)     | 336 (478 - 222)      | 54.3 (65.8 - 45.9)    | 44.5 (64.9 - 18.4)    | 614.5 (885.6 - 256.2)    | 8.2 (11.5 - 5.5)   |
| Malaysia    | 13791 (15715 - 11694) | 4806 (5438 - 3865)    | 83096 (94749 - 67089)    | 2059 (2891 - 1373)   | 180.7 (206.5 - 153.1) | 79.7 (91.1 - 63.7)    | 1135.3 (1285.2 - 915.9)  | 26.5 (37.1 - 17.8) |
| Namibia     | 791 (927 - 682)       | 317 (411 - 237)       | 5868 (7730 - 4320)       | 119 (163 - 80)       | 126.2 (149.1 - 106.7) | 73.6 (96 - 55.3)      | 1123.7 (1456.4 - 838.7)  | 18.6 (25.6 - 12.6) |
| Niger       | 2775 (3254 - 2350)    | 1022 (1376 - 639)     | 26310 (36950 - 16694)    | 426 (594 - 282)      | 89.1 (107.1 - 75)     | 57.2 (76 - 35.7)      | 915.6 (1221.6 - 583.3)   | 13.3 (18.6 - 9)    |
| Nigeria     | 38614 (45118 - 33086) | 16896 (21455 - 13644) | 359209 (474947 - 286745) | 5789 (7959 - 3976)   | 91 (105.6 - 77.8)     | 72.9 (90.4 - 59.2)    | 1056.7 (1331.5 - 855.3)  | 13.2 (18 - 9.2)    |
| Nicaragua   | 667 (818 - 532)       | 678 (836 - 374)       | 12855 (15854 - 7075)     | 83 (115 - 55)        | 43.6 (54.2 - 35)      | 57.9 (71.6 - 31.3)    | 823.9 (1015.2 - 457.3)   | 5.1 (7.1 - 3.4)    |
| Netherlands | 70204 (82902 - 59954) | 7653 (8726 - 6457)    | 93126 (105610 - 81107)   | 10047 (13727 - 6715) | 386.4 (453.9 - 331.7) | 39.6 (45.2 - 33.5)    | 496.8 (566.3 - 434.2)    | 55.4 (75.5 - 37)   |
| Norway      | 31350 (36515 - 26533) | 3383 (3840 - 2816)    | 40154 (45564 - 34373)    | 4443 (6030 - 3051)   | 506.6 (583.2 - 434.3) | 48.4 (54.9 - 40.4)    | 605 (686.5 - 520.7)      | 72.5 (97.9 - 49.5) |
| Nepal       | 16005 (19050 - 13275) | 2758 (4142 - 1660)    | 54424 (83253 - 31816)    | 2389 (3344 - 1551)   | 176.1 (210.1 - 146.5) | 50.3 (72.3 - 30.8)    | 744.6 (1107.8 - 452.3)   | 25.8 (36 - 16.9)   |

|                  |                        |                       |                          |                      |                       |                     |                          |                     |
|------------------|------------------------|-----------------------|--------------------------|----------------------|-----------------------|---------------------|--------------------------|---------------------|
| New Zealand      | 9553 (10778 - 8495)    | 1801 (2064 - 1541)    | 20718 (23800 - 18324)    | 1373 (1848 - 946)    | 269.1 (302.9 - 240.1) | 50.8 (58.4 - 43.4)  | 575.6 (662.6 - 508.8)    | 38.7 (52 - 26.8)    |
| Oman             | 389 (450 - 333)        | 109 (178 - 74)        | 2114 (3590 - 1405)       | 60 (84 - 40)         | 54.4 (61.8 - 47)      | 28.5 (45.3 - 19.8)  | 397.6 (651.4 - 271.9)    | 8.1 (11.1 - 5.5)    |
| Pakistan         | 95572 (113216 - 79463) | 24754 (32015 - 16667) | 429200 (556142 - 286949) | 14191 (19445 - 9326) | 174.5 (204.3 - 144.1) | 66.4 (85.2 - 44.1)  | 939.6 (1215.2 - 634.3)   | 25.4 (34.5 - 16.8)  |
| Panama           | 569 (670 - 478)        | 683 (821 - 457)       | 10084 (12108 - 6642)     | 86 (119 - 57)        | 43.6 (51.5 - 36)      | 61 (73.3 - 41.1)    | 791.6 (948.8 - 528.2)    | 6.5 (9.1 - 4.3)     |
| Peru             | 8923 (10278 - 7588)    | 3418 (3841 - 2573)    | 64910 (73558 - 48986)    | 1243 (1726 - 855)    | 81 (92.5 - 68.5)      | 42.8 (48.2 - 31.8)  | 611.8 (688.5 - 462.9)    | 10.8 (14.9 - 7.4)   |
| Philippines      | 39210 (44647 - 33692)  | 9944 (12986 - 8195)   | 190017 (245039 - 158940) | 5628 (7666 - 3807)   | 174.3 (198.9 - 149.5) | 55.6 (73.1 - 45.6)  | 828.3 (1073.8 - 688.2)   | 24.5 (33.1 - 16.5)  |
| Papua New Guinea | 2002 (2332 - 1697)     | 220 (320 - 137)       | 5842 (8639 - 3612)       | 300 (417 - 200)      | 155.9 (182.1 - 131.1) | 20.6 (28.9 - 13.7)  | 384.5 (543.8 - 251.6)    | 22.7 (31.7 - 15.4)  |
| Poland           | 39634 (46355 - 33261)  | 54326 (60157 - 48617) | 719880 (801606 - 641976) | 5910 (8242 - 3892)   | 100.6 (117.9 - 84.6)  | 147.1 (163 - 131.9) | 1893.5 (2105.4 - 1696.2) | 15 (20.8 - 10)      |
| North Korea      | 19878 (24059 - 15403)  | 4363 (6188 - 2351)    | 86032 (125537 - 45647)   | 2977 (4293 - 1940)   | 183.5 (228.4 - 141.6) | 53.1 (77.3 - 29.1)  | 802 (1129.1 - 445.9)     | 26.9 (38.6 - 17.3)  |
| Portugal         | 70903 (82192 - 60551)  | 15990 (17338 - 13464) | 199270 (217260 - 169924) | 10108 (13946 - 6799) | 556.6 (644.3 - 476.1) | 122.6 (133 - 103.3) | 1527.8 (1665.6 - 1303.9) | 79.6 (109.7 - 53.5) |
| Paraguay         | 4150 (4819 - 3529)     | 1260 (1432 - 939)     | 21077 (24185 - 15059)    | 619 (860 - 426)      | 204.2 (238.5 - 173.5) | 81.7 (92.6 - 61.4)  | 1139.6 (1299.7 - 833.1)  | 30 (41.7 - 20.7)    |
| Palestine        | 499 (562 - 438)        | 128 (179 - 86)        | 2713 (3842 - 1930)       | 78 (108 - 53)        | 67.2 (75.1 - 59.5)    | 30.1 (41.4 - 19.7)  | 448.7 (625.3 - 304.8)    | 10.1 (13.7 - 7)     |
| Qatar            | 122 (148 - 99)         | 30 (40 - 24)          | 647 (920 - 498)          | 19 (28 - 12)         | 57.1 (69.6 - 47.3)    | 43.3 (55.3 - 35.3)  | 520.4 (682.4 - 425)      | 8.6 (12.3 - 5.7)    |

|                 |                          |                          |                             |                       |                       |                       |                          |                     |
|-----------------|--------------------------|--------------------------|-----------------------------|-----------------------|-----------------------|-----------------------|--------------------------|---------------------|
| Romania         | 32794 (38803 - 27828)    | 34262 (40227 - 31280)    | 470506 (551624 - 431597)    | 4904 (6756 - 3294)    | 128.8 (151.4 - 110.3) | 152.4 (178.7 - 138.7) | 1963.6 (2301.9 - 1796.3) | 19.3 (26.5 - 13)    |
| Russia          | 223946 (260480 - 186172) | 291220 (320653 - 251326) | 4075803 (4567372 - 3486591) | 33681 (45757 - 22468) | 137.9 (158.9 - 114.3) | 200 (220.6 - 172)     | 2632.4 (2933.4 - 2257.2) | 20.8 (28.4 - 13.9)  |
| Rwanda          | 1567 (1872 - 1271)       | 1946 (2771 - 931)        | 39288 (59720 - 18444)       | 248 (355 - 166)       | 57.5 (70.5 - 45.1)    | 126.9 (177 - 64.3)    | 1989.1 (2829.6 - 953.7)  | 8.9 (12.5 - 6)      |
| Saudi Arabia    | 1719 (2125 - 1368)       | 3681 (4544 - 3038)       | 55227 (71125 - 44307)       | 274 (386 - 182)       | 25.9 (33.2 - 20.3)    | 82 (100.5 - 68.1)     | 1056.6 (1333.6 - 849)    | 4.1 (5.8 - 2.7)     |
| Sudan           | 4877 (5728 - 3944)       | 4979 (6560 - 3260)       | 106579 (154063 - 63512)     | 747 (1036 - 492)      | 57.9 (69.1 - 46.5)    | 89.8 (113.6 - 57.4)   | 1367.8 (1818.8 - 893.8)  | 8.6 (12.1 - 5.7)    |
| Senegal         | 2873 (3339 - 2452)       | 1512 (1842 - 1101)       | 31320 (38374 - 22559)       | 440 (609 - 291)       | 87.8 (102.9 - 74.9)   | 76.7 (93.8 - 56.3)    | 1165.1 (1418.3 - 846.8)  | 13.2 (18.1 - 8.7)   |
| Singapore       | 9384 (10570 - 7949)      | 897 (1006 - 733)         | 14048 (15739 - 11732)       | 1381 (1868 - 927)     | 517.4 (585.9 - 433.5) | 58.6 (65.6 - 47.6)    | 817.3 (911.5 - 678.4)    | 75.2 (101.8 - 50.4) |
| Solomon Islands | 169 (198 - 142)          | 59 (85 - 30)             | 1327 (2077 - 626)           | 25 (35 - 17)          | 167.1 (196.6 - 138.7) | 66.1 (91.4 - 34.4)    | 1158.9 (1689.7 - 584.2)  | 24.6 (34.3 - 16.4)  |
| Sierra Leone    | 1707 (2027 - 1427)       | 822 (1025 - 568)         | 19782 (25398 - 13552)       | 259 (362 - 173)       | 92.2 (110.9 - 76.7)   | 74.2 (92.3 - 54.4)    | 1195.4 (1486.7 - 833.8)  | 13.6 (19 - 9)       |
| El Salvador     | 1139 (1364 - 958)        | 895 (1091 - 546)         | 17766 (21491 - 11063)       | 168 (234 - 113)       | 42.8 (51.5 - 35.6)    | 35.6 (43.6 - 21.6)    | 571.7 (694.4 - 351.8)    | 6.2 (8.7 - 4.2)     |
| Somalia         | 1682 (2004 - 1442)       | 1484 (2495 - 647)        | 27703 (48309 - 11729)       | 263 (366 - 174)       | 56.1 (66.1 - 48.1)    | 82.5 (133.7 - 35.9)   | 1213.8 (2046.3 - 529.9)  | 8.6 (11.8 - 5.6)    |

|                       |                       |                      |                          |                     |                       |                      |                          |                     |
|-----------------------|-----------------------|----------------------|--------------------------|---------------------|-----------------------|----------------------|--------------------------|---------------------|
| Serbia                | 12579 (14452 - 10598) | 10309 (12115 - 8605) | 140340 (165935 - 115431) | 1885 (2576 - 1254)  | 123.8 (141.9 - 104.7) | 122.3 (143.2 - 102)  | 1551.6 (1833.6 - 1290.7) | 18.5 (25.2 - 12.3)  |
| South Sudan           | 1467 (1891 - 1209)    | 1212 (1774 - 667)    | 24598 (36795 - 13289)    | 227 (332 - 150)     | 55.1 (69.5 - 45.5)    | 86.4 (122.4 - 48.8)  | 1274.3 (1847.2 - 710.4)  | 8.2 (11.8 - 5.6)    |
| Sao Tome and Principe | 53 (60 - 46)          | 30 (37 - 24)         | 631 (780 - 508)          | 8 (11 - 5)          | 90.2 (102.9 - 78.3)   | 58.6 (73.1 - 46.9)   | 995.3 (1219.5 - 819.5)   | 13.4 (18.3 - 9.2)   |
| Suriname              | 598 (681 - 511)       | 180 (212 - 161)      | 3371 (3885 - 2995)       | 85 (116 - 58)       | 279.1 (321.7 - 235.5) | 92.9 (110.4 - 82.9)  | 1497.9 (1737.3 - 1341.5) | 39.2 (53.5 - 26.8)  |
| Slovakia              | 6783 (7841 - 5714)    | 6455 (7280 - 5741)   | 88187 (99689 - 79277)    | 1008 (1383 - 669)   | 128.1 (148.1 - 107.7) | 130.4 (147 - 115.5)  | 1723.4 (1939.1 - 1548.7) | 19 (26.1 - 12.6)    |
| Slovenia              | 2967 (3500 - 2567)    | 2270 (2479 - 1931)   | 28644 (31325 - 24386)    | 436 (603 - 292)     | 133.3 (157.2 - 115.4) | 107.4 (117.2 - 91.3) | 1335.4 (1458.7 - 1135)   | 19.6 (27.1 - 13.1)  |
| Sweden                | 70772 (84368 - 60658) | 6961 (8141 - 6074)   | 82113 (94077 - 72868)    | 9982 (13988 - 6649) | 517.6 (610.1 - 449.4) | 43.7 (51.2 - 38.2)   | 554.1 (635.5 - 491)      | 73.8 (103.6 - 49.6) |
| Swaziland             | 429 (500 - 370)       | 136 (171 - 97)       | 2636 (3315 - 1807)       | 64 (89 - 43)        | 125.9 (146.5 - 108.5) | 65.1 (81.6 - 47.5)   | 984.2 (1228.2 - 698.1)   | 18.5 (25.4 - 12.5)  |
| Seychelles            | 84 (97 - 72)          | 40 (47 - 32)         | 661 (787 - 528)          | 12 (17 - 8)         | 172.8 (202 - 147.8)   | 82 (95.6 - 66.4)     | 1356.8 (1617.2 - 1081.9) | 25.3 (34.6 - 17)    |
| Syria                 | 2864 (3423 - 2447)    | 2299 (3381 - 1701)   | 58254 (85341 - 43840)    | 424 (585 - 287)     | 57.4 (68.5 - 49.1)    | 60.6 (89.5 - 44.9)   | 1041.1 (1519.1 - 770.9)  | 8.2 (11.2 - 5.6)    |
| Chad                  | 2306 (2760 - 1893)    | 863 (1158 - 493)     | 17675 (24112 - 9979)     | 344 (478 - 229)     | 88.4 (107 - 73.2)     | 49.4 (66.9 - 28.9)   | 755.5 (1011.9 - 432.1)   | 12.9 (17.9 - 8.7)   |

|                     |                       |                       |                          |                     |                       |                     |                          |                    |
|---------------------|-----------------------|-----------------------|--------------------------|---------------------|-----------------------|---------------------|--------------------------|--------------------|
| Togo                | 1435 (1721 - 1202)    | 781 (951 - 587)       | 16445 (20082 - 12598)    | 219 (310 - 145)     | 88 (106.9 - 73.6)     | 77.3 (95.8 - 58.2)  | 1183.8 (1437.2 - 886.5)  | 13.1 (18.6 - 8.5)  |
| Thailand            | 50900 (57354 - 44043) | 6657 (8726 - 5701)    | 111892 (144911 - 95057)  | 7656 (10435 - 5323) | 170.7 (194 - 146.5)   | 28.4 (37.3 - 24.1)  | 378.9 (489.4 - 324.8)    | 25.3 (34.4 - 17.7) |
| Tajikistan          | 1414 (1708 - 1155)    | 1960 (2680 - 1558)    | 30358 (43829 - 23271)    | 218 (306 - 140)     | 54.2 (65.4 - 43.9)    | 94.2 (126.6 - 75.4) | 1319.5 (1861.9 - 1025.8) | 8.2 (11.6 - 5.4)   |
| Turkmenistan        | 825 (971 - 698)       | 121 (156 - 102)       | 2901 (3694 - 2475)       | 127 (180 - 85)      | 45.9 (54.7 - 38.9)    | 7.8 (10.2 - 6.6)    | 152.5 (191.6 - 129.9)    | 7 (9.8 - 4.7)      |
| Timor-Leste         | 364 (421 - 313)       | 108 (166 - 69)        | 2786 (4784 - 1821)       | 54 (75 - 37)        | 177.7 (206.3 - 153.7) | 74 (105.8 - 48)     | 1136 (1705.1 - 730)      | 25.6 (35.2 - 17.7) |
| Tonga               | 67 (78 - 54)          | 19 (24 - 14)          | 314 (426 - 227)          | 10 (14 - 7)         | 146.2 (170.5 - 114.3) | 48.6 (63 - 37.1)    | 701.2 (928.3 - 526.5)    | 21.6 (29.8 - 14.4) |
| Trinidad and Tobago | 2019 (2382 - 1727)    | 653 (719 - 555)       | 11086 (12238 - 9395)     | 294 (407 - 193)     | 277.7 (330.6 - 235.4) | 98.1 (108 - 83.3)   | 1501.9 (1650.5 - 1275.6) | 40 (55.5 - 26.5)   |
| Tunisia             | 3093 (3464 - 2684)    | 1967 (2405 - 1498)    | 33684 (42831 - 24930)    | 475 (636 - 315)     | 70.2 (78.8 - 61.2)    | 71.4 (87.9 - 54.1)  | 919.4 (1130.7 - 702.6)   | 10.6 (14.2 - 7.1)  |
| Turkey              | 18177 (21344 - 15307) | 17708 (22187 - 14916) | 269925 (347697 - 219167) | 2813 (3999 - 1833)  | 56.3 (66.4 - 47.2)    | 78.9 (98 - 66.3)    | 1008.9 (1285.3 - 839.2)  | 8.6 (12.1 - 5.7)   |
| Taiwan              | 41802 (50151 - 34133) | 5009 (6005 - 4001)    | 84883 (103167 - 68054)   | 6177 (8707 - 4070)  | 317.2 (379.2 - 261.7) | 49.4 (59 - 39.5)    | 692.9 (829.8 - 559.7)    | 46.4 (64.4 - 30.9) |
| Tanzania            | 8222 (10211 - 6764)   | 2091 (2932 - 897)     | 37885 (51913 - 17401)    | 1263 (1811 - 820)   | 80.8 (102 - 64.4)     | 35.6 (50 - 15.5)    | 491.7 (683.2 - 220.4)    | 12 (17.1 - 7.9)    |
| Uganda              | 4163 (4955 - 3445)    | 2505 (3837 - 588)     | 46531 (72179 - 11391)    | 645 (898 - 433)     | 57 (67.4 - 47.3)      | 62.1 (94.6 - 15.1)  | 891.3 (1362.6 - 216)     | 8.6 (12 - 5.8)     |



|                                  |                             |                        |                             |                          |                       |                      |                          |                      |
|----------------------------------|-----------------------------|------------------------|-----------------------------|--------------------------|-----------------------|----------------------|--------------------------|----------------------|
| Ukraine                          | 148201 (171289 - 125281)    | 84785 (95779 - 69711)  | 1172456 (1362690 - 973551)  | 22381 (30441 - 15115)    | 239.4 (275.3 - 203.6) | 139.5 (157.5 - 115)  | 1865.6 (2163.2 - 1560.6) | 36.2 (49 - 24.5)     |
| Uruguay                          | 6049 (7322 - 5217)          | 2811 (3146 - 2457)     | 38293 (42724 - 33479)       | 893 (1219 - 604)         | 175.1 (210.8 - 151.5) | 82.3 (92.5 - 71.8)   | 1108.8 (1236.1 - 970.6)  | 25.9 (35.4 - 17.5)   |
| United States                    | 2350612 (2698010 - 2067951) | 85588 (102433 - 72855) | 1293012 (1507586 - 1125068) | 330801 (453557 - 222886) | 809.8 (929.7 - 712.9) | 27.7 (33.2 - 23.6)   | 437.6 (511.4 - 379.7)    | 114.4 (156.7 - 76.8) |
| Uzbekistan                       | 5729 (6776 - 4718)          | 8961 (10458 - 7857)    | 147133 (173453 - 126398)    | 885 (1237 - 580)         | 55 (65.4 - 44.5)      | 100.9 (117.6 - 88.3) | 1524.9 (1787.9 - 1319.6) | 8.4 (11.7 - 5.5)     |
| Saint Vincent and the Grenadines | 166 (196 - 137)             | 65 (73 - 55)           | 1031 (1148 - 871)           | 24 (33 - 16)             | 256.1 (301.7 - 213)   | 102.1 (115 - 86.2)   | 1550.6 (1736.5 - 1306)   | 36.9 (51.3 - 24.4)   |
| Venezuela                        | 3969 (4648 - 3281)          | 3843 (4629 - 2515)     | 68336 (83174 - 43033)       | 604 (830 - 395)          | 45.4 (53.2 - 37.7)    | 56.1 (67.5 - 37)     | 788.7 (953.6 - 508.3)    | 6.8 (9.2 - 4.4)      |
| Vietnam                          | 76473 (85017 - 67644)       | 49628 (60366 - 36419)  | 752122 (929525 - 540071)    | 10437 (14243 - 7148)     | 192 (214.1 - 169.1)   | 132.4 (161 - 98.1)   | 1914.3 (2355.7 - 1380.3) | 26 (35.4 - 17.8)     |
| Vanuatu                          | 93 (108 - 81)               | 36 (53 - 22)           | 724 (1113 - 403)            | 14 (19 - 9)              | 160.6 (188.4 - 139.2) | 68.3 (96.1 - 42.6)   | 1167.1 (1733.6 - 686.1)  | 23.7 (32.6 - 16)     |
| Samoa                            | 105 (121 - 90)              | 34 (54 - 20)           | 677 (1194 - 374)            | 16 (22 - 11)             | 154.7 (178.4 - 131.3) | 59.7 (91.8 - 36.8)   | 960 (1575.4 - 567.5)     | 22.8 (31.3 - 15.3)   |
| Anhui                            | 21756 (28124 - 16751)       | 9750 (15208 - 7287)    | 190277 (279613 - 146818)    | 3260 (4755 - 2117)       | 65.2 (83.9 - 50.5)    | 33.2 (53.9 - 24.5)   | 539.7 (816.9 - 414.7)    | 9.6 (14.1 - 6.4)     |
| Sonora                           | 346 (424 - 283)             | 150 (177 - 120)        | 2756 (3180 - 2220)          | 52 (72 - 35)             | 40.2 (49.6 - 32.5)    | 21.5 (25.4 - 17.1)   | 315.3 (367.8 - 254.9)    | 6 (8.4 - 4)          |
| Beijing                          | 20311 (23202 - 17865)       | 6671 (7958 - 5563)     | 108100 (130896 - 89212)     | 2997 (4160 - 2068)       | 248.7 (285.8 - 217.8) | 98.6 (118.3 - 82.4)  | 1375.7 (1652.2 - 1144.8) | 36.1 (50.1 - 24.9)   |

|              |                         |                       |                          |                      |                       |                      |                          |                    |
|--------------|-------------------------|-----------------------|--------------------------|----------------------|-----------------------|----------------------|--------------------------|--------------------|
| Tabasco      | 238 (280 - 198)         | 132 (153 - 106)       | 2291 (2622 - 1851)       | 36 (50 - 24)         | 40.8 (48.5 - 34.1)    | 25.9 (30.2 - 20.9)   | 372.4 (427.8 - 300.9)    | 6.1 (8.4 - 4)      |
| Guangdong    | 75942 (92219 - 62679)   | 15685 (20691 - 12395) | 254102 (326817 - 201086) | 11097 (15609 - 7209) | 190.8 (233.4 - 157.3) | 42.8 (56.7 - 33.9)   | 641.6 (822.8 - 509.7)    | 27.7 (39.1 - 18)   |
| Guangxi      | 29496 (35977 - 22408)   | 9941 (14748 - 7680)   | 181381 (256931 - 137920) | 4380 (6172 - 2721)   | 114.5 (140.3 - 87.2)  | 40.8 (61.2 - 31.5)   | 686.6 (976.8 - 525.8)    | 16.9 (23.9 - 10.7) |
| Chongqing    | 19106 (23248 - 14559)   | 2799 (3520 - 2116)    | 50509 (62394 - 38963)    | 2850 (4046 - 1866)   | 173 (210.6 - 135)     | 29.2 (37.3 - 22)     | 459.2 (571.2 - 355.9)    | 25.5 (35.8 - 16.9) |
| Guizhou      | 22795 (29423 - 17628)   | 4021 (6629 - 2991)    | 88526 (136184 - 66958)   | 3395 (4837 - 2171)   | 131.5 (167.6 - 101.6) | 24 (40.5 - 17.8)     | 459 (718.9 - 346.6)      | 19.4 (27.5 - 12.4) |
| Hebei        | 77011 (93053 - 60215)   | 24530 (31245 - 19724) | 415114 (529254 - 325699) | 11406 (16383 - 7318) | 195.8 (238.2 - 151.7) | 71.9 (92.4 - 58.8)   | 1061.9 (1344.2 - 842.8)  | 28.7 (41.1 - 18.3) |
| Heilongjiang | 59019 (69982 - 48642)   | 15317 (19145 - 12610) | 307189 (392886 - 248643) | 8828 (12414 - 5870)  | 348.9 (413 - 280.9)   | 113.5 (138.1 - 94.5) | 1801.6 (2252.3 - 1497.6) | 51.3 (71.8 - 33.5) |
| Henan        | 102561 (128561 - 83364) | 38304 (46833 - 30908) | 648655 (799884 - 523677) | 15321 (21891 - 9958) | 189.7 (237.8 - 153.9) | 81 (98.8 - 65.5)     | 1207.8 (1477.4 - 966.6)  | 28.1 (40.3 - 18.4) |
| Hubei        | 60872 (77143 - 47974)   | 9648 (13610 - 6624)   | 194692 (263568 - 135148) | 9005 (13135 - 5746)  | 189 (234.1 - 151.2)   | 35 (50.6 - 24.8)     | 586 (804.5 - 412.3)      | 27.6 (40 - 17.6)   |
| Hunan        | 93836 (114207 - 77081)  | 10850 (15801 - 8450)  | 218662 (311812 - 169984) | 14058 (20209 - 9205) | 246.3 (300.7 - 203.2) | 32.2 (46.5 - 25.2)   | 557.3 (797.9 - 439.5)    | 36.5 (52.2 - 23.9) |
| Jiangxi      | 19667 (24274 - 15965)   | 7640 (9832 - 5073)    | 132150 (170129 - 88429)  | 2924 (4106 - 1900)   | 94.7 (116.3 - 76.3)   | 44.3 (56.6 - 29.2)   | 645.6 (824.4 - 431.8)    | 13.9 (19.6 - 9)    |
| Jilin        | 37709 (44624 - 31080)   | 12901 (16311 - 10501) | 246027 (310092 - 197543) | 5621 (7756 - 3852)   | 285.5 (340.2 - 233.6) | 115.1 (146.7 - 95.4) | 1839.9 (2310.8 - 1490.3) | 42 (58 - 29.1)     |
| Shaanxi      | 40421 (48673 - 33217)   | 6933 (9508 - 5421)    | 140325 (187169 - 110027) | 6060 (8410 - 4011)   | 217.8 (265.7 - 180.2) | 43.7 (60.6 - 34.4)   | 727.1 (975.8 - 570.3)    | 32.2 (45 - 21.2)   |

|                                 |                        |                       |                          |                      |                       |                     |                          |                     |
|---------------------------------|------------------------|-----------------------|--------------------------|----------------------|-----------------------|---------------------|--------------------------|---------------------|
| Shandong                        | 85294 (108797 - 65585) | 39651 (49569 - 33037) | 622410 (767168 - 513741) | 12657 (18608 - 8063) | 147.6 (190.1 - 113.2) | 78.8 (99.4 - 65.7)  | 1106.8 (1369.2 - 917.3)  | 21.7 (32 - 13.9)    |
| Shanghai                        | 18327 (20910 - 15573)  | 6473 (8758 - 5217)    | 94155 (123308 - 77119)   | 2692 (3703 - 1826)   | 139.1 (159.3 - 118.4) | 55.1 (75.2 - 44)    | 730.3 (966.3 - 597.5)    | 20.3 (27.9 - 13.6)  |
| Shanxi                          | 47443 (56389 - 38179)  | 11895 (15662 - 9608)  | 216381 (283135 - 173880) | 6998 (9894 - 4544)   | 277.3 (331.5 - 223.4) | 82.9 (109.8 - 67.1) | 1263.4 (1656.8 - 1018.6) | 40.4 (57.4 - 26.2)  |
| Sichuan                         | 75783 (91734 - 59744)  | 13350 (19409 - 10423) | 251317 (348345 - 198362) | 11315 (15916 - 7467) | 113.7 (137.1 - 91.1)  | 23 (34.1 - 18)      | 366.2 (516.6 - 289.1)    | 16.8 (23.7 - 11)    |
| Tlaxcala                        | 158 (189 - 132)        | 76 (87 - 62)          | 1233 (1403 - 995)        | 24 (33 - 16)         | 41.6 (50.1 - 34.6)    | 22 (25.2 - 17.9)    | 313.6 (356 - 253)        | 6.2 (8.8 - 4.1)     |
| Fujian                          | 16095 (20983 - 9571)   | 6150 (8266 - 4763)    | 103455 (137868 - 80887)  | 2394 (3568 - 1309)   | 92.6 (121.1 - 54.3)   | 41.7 (56.7 - 31.9)  | 605.6 (811.1 - 475.7)    | 13.6 (20.5 - 7.4)   |
| Veracruz de Ignacio de la Llave | 1300 (1552 - 1039)     | 750 (876 - 623)       | 12486 (14362 - 10252)    | 197 (275 - 130)      | 38.6 (46.2 - 30.6)    | 24.7 (29 - 20.3)    | 361.5 (417 - 296.5)      | 5.8 (8.1 - 3.8)     |
| Gansu                           | 18037 (23624 - 12514)  | 2072 (2639 - 1640)    | 43958 (56225 - 35070)    | 2722 (4091 - 1717)   | 166.1 (215.6 - 120.3) | 24.4 (30.9 - 19.2)  | 394.9 (498.3 - 316.1)    | 24.6 (36 - 15.5)    |
| North East England              | 18414 (21685 - 15096)  | 2334 (2611 - 1879)    | 29886 (33262 - 25035)    | 2608 (3617 - 1749)   | 506.2 (593.3 - 419.2) | 60.6 (67.8 - 48.8)  | 789.6 (879.2 - 661.9)    | 72.1 (98.8 - 48.4)  |
| North West England              | 48814 (60654 - 34014)  | 6129 (6858 - 4993)    | 75650 (84762 - 61950)    | 6955 (9929 - 4198)   | 499.8 (615.6 - 357.9) | 56.6 (63.3 - 46.2)  | 731.1 (816 - 603.1)      | 71.8 (102.2 - 44)   |
| Yorkshire and the Humber        | 35411 (42404 - 29842)  | 4322 (4860 - 3429)    | 52809 (59270 - 43536)    | 4996 (6874 - 3346)   | 501.6 (598.6 - 426.7) | 55.1 (61.9 - 43.8)  | 704.2 (789.1 - 584.3)    | 71.4 (98.2 - 48)    |
| East Midlands                   | 29471 (34453 - 23908)  | 3287 (3687 - 2617)    | 40394 (44838 - 33794)    | 4174 (5840 - 2755)   | 521.2 (604.8 - 424.1) | 53.1 (59.6 - 42.3)  | 677.5 (752.8 - 570.2)    | 74.4 (103.7 - 49.2) |
| West Midlands                   | 36308 (42169 - 30298)  | 4323 (4845 - 3513)    | 54011 (60992 - 45145)    | 5163 (7156 - 3391)   | 503.1 (581.7 - 418.6) | 56.2 (62.9 - 45.7)  | 717.4 (810 - 600.9)      | 72 (99.8 - 47.2)    |
| East of England                 | 37821 (46941 - 32286)  | 3971 (4454 - 3191)    | 46629 (52767 - 39155)    | 5370 (7488 - 3618)   | 519.4 (636.3 - 447.7) | 48.7 (54.6 - 39.2)  | 599.5 (675.9 - 505.8)    | 74.4 (103.5 - 50.4) |

|                     |                       |                       |                          |                     |                       |                      |                          |                     |
|---------------------|-----------------------|-----------------------|--------------------------|---------------------|-----------------------|----------------------|--------------------------|---------------------|
| Greater London      | 42299 (49172 - 35443) | 4506 (5091 - 3596)    | 55199 (61874 - 45809)    | 5962 (8124 - 4022)  | 466.4 (536.7 - 393.9) | 44.1 (49.8 - 35.2)   | 576.8 (648.2 - 478.6)    | 66.4 (90.1 - 44.8)  |
| South East England  | 60760 (74350 - 50947) | 6436 (7216 - 5174)    | 73286 (81662 - 60815)    | 8619 (11949 - 5758) | 538.2 (655.9 - 458.3) | 48.3 (53.9 - 39)     | 593.2 (665.3 - 493.3)    | 77.2 (106.5 - 52.1) |
| South West England  | 37445 (43967 - 31650) | 4634 (5183 - 3670)    | 51774 (57739 - 43234)    | 5254 (7161 - 3546)  | 490.2 (572.4 - 418.5) | 50.4 (56.4 - 40.2)   | 608.7 (678.6 - 511.1)    | 69.7 (95.3 - 47.3)  |
| Wales               | 23414 (27749 - 20137) | 2501 (2819 - 2027)    | 30839 (34500 - 26324)    | 3306 (4571 - 2230)  | 535.6 (626.4 - 462.7) | 52 (58.6 - 42.2)     | 667.8 (749.8 - 570.4)    | 76.3 (104.9 - 51.6) |
| Hainan              | 7641 (9614 - 5981)    | 2463 (3226 - 1999)    | 40253 (52507 - 31944)    | 1127 (1581 - 715)   | 190.9 (239.1 - 148)   | 66.7 (87.4 - 54.6)   | 1003.9 (1309.7 - 801)    | 28 (39.2 - 17.9)    |
| Zacatecas           | 267 (335 - 199)       | 139 (160 - 109)       | 2146 (2437 - 1702)       | 40 (56 - 27)        | 39.4 (49.9 - 28.9)    | 21.5 (24.7 - 16.9)   | 306 (348.3 - 242.5)      | 5.9 (8.3 - 3.9)     |
| Tamaulipas          | 495 (616 - 403)       | 238 (281 - 199)       | 3932 (4582 - 3283)       | 74 (106 - 49)       | 42.7 (53.6 - 34.7)    | 23 (27.3 - 19.2)     | 334.2 (390.1 - 279)      | 6.3 (9.1 - 4.2)     |
| Jiangsu             | 36708 (44887 - 28749) | 8689 (15372 - 6229)   | 164352 (265641 - 123716) | 5415 (7704 - 3598)  | 73.8 (90.3 - 56.7)    | 19.1 (34.8 - 13.4)   | 318.6 (526.9 - 238.2)    | 10.8 (15.4 - 7.2)   |
| Yucatán             | 332 (412 - 263)       | 186 (213 - 145)       | 2935 (3317 - 2349)       | 50 (72 - 32)        | 40.1 (49.8 - 31.6)    | 25.1 (28.7 - 19.4)   | 350.7 (396.9 - 279.7)    | 6.1 (8.6 - 3.9)     |
| Liaoning            | 52854 (62460 - 43384) | 22874 (28442 - 18818) | 372527 (463593 - 298769) | 7866 (11062 - 5105) | 203.2 (239.4 - 166)   | 103.5 (128.9 - 85.7) | 1472.1 (1833.5 - 1198.9) | 30 (41.5 - 19.5)    |
| Aguascalientes      | 134 (160 - 114)       | 57 (66 - 45)          | 923 (1068 - 733)         | 20 (28 - 14)        | 41 (49.4 - 34.4)      | 19.5 (22.8 - 15.2)   | 272.8 (316 - 215.3)      | 6.1 (8.6 - 4.2)     |
| Baja California     | 294 (349 - 240)       | 135 (159 - 110)       | 2549 (3004 - 2112)       | 45 (62 - 29)        | 41.7 (50.2 - 33.5)    | 23.9 (28.3 - 19.4)   | 352.4 (412.2 - 292)      | 6.2 (8.6 - 4.1)     |
| Baja California Sur | 49 (57 - 40)          | 20 (24 - 16)          | 356 (419 - 286)          | 7 (10 - 5)          | 38.8 (46.4 - 31.6)    | 18.5 (22 - 14.3)     | 271.2 (318.5 - 215)      | 5.8 (8.2 - 3.8)     |
| Campeche            | 101 (123 - 82)        | 52 (60 - 42)          | 888 (1022 - 733)         | 15 (21 - 10)        | 41.6 (51.2 - 34)      | 24.2 (28.1 - 19.6)   | 353.7 (407.8 - 290.8)    | 6.2 (8.7 - 4)       |

|                     |                       |                    |                          |                    |                       |                     |                          |                    |
|---------------------|-----------------------|--------------------|--------------------------|--------------------|-----------------------|---------------------|--------------------------|--------------------|
| Coahuila            | 380 (461 - 314)       | 178 (204 - 138)    | 3039 (3482 - 2446)       | 57 (80 - 37)       | 40.8 (50.2 - 33.5)    | 21.9 (25.2 - 17)    | 320.9 (368.5 - 255.7)    | 6.1 (8.6 - 4)      |
| Colima              | 82 (97 - 68)          | 44 (52 - 35)       | 724 (846 - 591)          | 12 (17 - 8)        | 39.1 (46.2 - 32.1)    | 22.9 (26.9 - 18)    | 333 (387.6 - 270.7)      | 5.8 (8.1 - 3.8)    |
| Inner Mongolia      | 18505 (22793 - 15292) | 6943 (8857 - 5586) | 136441 (174697 - 108994) | 2772 (3923 - 1828) | 178.1 (222.7 - 147.1) | 85.3 (107.1 - 69.7) | 1303.8 (1652.9 - 1056.9) | 26.2 (37.3 - 17.2) |
| Chiapas             | 474 (570 - 391)       | 198 (227 - 157)    | 3955 (4510 - 3157)       | 72 (100 - 47)      | 41.9 (51.4 - 34.3)    | 20.3 (23.4 - 15.9)  | 315.8 (359.9 - 252.8)    | 6.2 (8.7 - 4)      |
| Chihuahua           | 434 (524 - 356)       | 213 (257 - 173)    | 4198 (5019 - 3435)       | 66 (95 - 44)       | 39.5 (47.8 - 32.3)    | 25.1 (30.7 - 20.2)  | 382.5 (459 - 312.8)      | 5.9 (8.5 - 3.9)    |
| Distrito Federal    | 1995 (2336 - 1689)    | 761 (900 - 605)    | 12235 (14386 - 9955)     | 301 (411 - 199)    | 39.5 (46.1 - 33.4)    | 17.6 (21 - 13.9)    | 245 (287 - 196.8)        | 5.9 (8.1 - 3.9)    |
| Durango             | 257 (308 - 207)       | 122 (141 - 97)     | 2141 (2473 - 1752)       | 39 (54 - 25)       | 40.4 (48.6 - 32.1)    | 21.4 (24.8 - 16.9)  | 321.7 (370.3 - 262.7)    | 6 (8.4 - 3.9)      |
| Guanajuato          | 792 (982 - 622)       | 403 (460 - 320)    | 6336 (7248 - 5125)       | 119 (168 - 78)     | 39.9 (50.1 - 31)      | 21.4 (24.4 - 16.9)  | 305.1 (348.5 - 247)      | 6 (8.4 - 3.9)      |
| Guerrero            | 510 (614 - 408)       | 289 (343 - 231)    | 5087 (5968 - 4129)       | 77 (109 - 50)      | 38.3 (46.4 - 30.4)    | 24.3 (29 - 19.4)    | 367.3 (430.9 - 297.2)    | 5.7 (8.1 - 3.7)    |
| Hidalgo             | 385 (470 - 296)       | 207 (236 - 164)    | 3430 (3910 - 2763)       | 58 (82 - 38)       | 39.8 (48.8 - 30.3)    | 23.4 (26.7 - 18.4)  | 343.3 (391.6 - 276.3)    | 5.9 (8.4 - 3.9)    |
| Jalisco             | 1193 (1456 - 962)     | 580 (675 - 458)    | 9268 (10607 - 7306)      | 179 (256 - 118)    | 39.4 (48.5 - 31.9)    | 21.1 (24.6 - 16.5)  | 300.6 (345.3 - 239.4)    | 5.9 (8.4 - 3.9)    |
| México              | 1769 (2113 - 1483)    | 719 (852 - 578)    | 12152 (14174 - 9910)     | 273 (385 - 176)    | 37.2 (44.5 - 31)      | 17.7 (21.2 - 14.2)  | 249.9 (290.7 - 200.9)    | 5.7 (8 - 3.6)      |
| Michoacán de Ocampo | 754 (924 - 587)       | 425 (485 - 333)    | 6708 (7612 - 5423)       | 114 (162 - 73)     | 40.1 (49.8 - 30.6)    | 24.4 (27.9 - 19)    | 345.9 (392.2 - 278.7)    | 6 (8.6 - 3.9)      |
| Morelos             | 253 (306 - 208)       | 124 (144 - 101)    | 2059 (2390 - 1679)       | 38 (54 - 25)       | 39 (47.5 - 31.8)      | 21.3 (24.9 - 17.3)  | 310.6 (359.4 - 252.3)    | 5.8 (8.2 - 3.8)    |
| Nayarit             | 169 (211 - 141)       | 79 (93 - 63)       | 1336 (1553 - 1078)       | 25 (37 - 17)       | 40.2 (50.3 - 33.2)    | 21.7 (25.5 - 17.1)  | 312.3 (363.8 - 250.3)    | 6 (8.5 - 4)        |

|                  |                       |                    |                        |                    |                       |                     |                          |                     |
|------------------|-----------------------|--------------------|------------------------|--------------------|-----------------------|---------------------|--------------------------|---------------------|
| Nuevo León       | 602 (772 - 468)       | 269 (315 - 206)    | 4405 (5143 - 3513)     | 92 (132 - 59)      | 36.4 (48.2 - 27.6)    | 19.1 (22.5 - 14.5)  | 267.9 (312 - 212.6)      | 5.5 (8 - 3.5)       |
| Oaxaca           | 611 (726 - 500)       | 306 (359 - 253)    | 5784 (6695 - 4809)     | 93 (134 - 60)      | 39.5 (47.1 - 31.9)    | 23.3 (27.6 - 19.1)  | 360.5 (416 - 300.6)      | 5.9 (8.5 - 3.8)     |
| Puebla           | 834 (1017 - 684)      | 413 (486 - 332)    | 7234 (8359 - 5922)     | 127 (180 - 81)     | 38 (46.2 - 31.2)      | 21.5 (25.3 - 17.2)  | 317.6 (368.9 - 258.5)    | 5.7 (8.1 - 3.7)     |
| Querétaro        | 183 (221 - 152)       | 89 (103 - 69)      | 1481 (1689 - 1184)     | 28 (39 - 18)       | 38.7 (47.4 - 31.4)    | 20.8 (24.1 - 16.1)  | 300.3 (341.8 - 239.5)    | 5.8 (8.2 - 3.7)     |
| Quintana Roo     | 58 (69 - 49)          | 19 (22 - 15)       | 392 (454 - 318)        | 9 (13 - 6)         | 38.9 (46.4 - 32)      | 17.3 (20.2 - 13.7)  | 244.6 (284 - 198.3)      | 5.8 (8.1 - 3.8)     |
| San Luis Potosí  | 395 (474 - 326)       | 194 (227 - 153)    | 3040 (3492 - 2451)     | 60 (82 - 39)       | 38.3 (46.6 - 31.3)    | 20.3 (23.8 - 15.9)  | 287.9 (331 - 230.1)      | 5.7 (8 - 3.8)       |
| Sinaloa          | 439 (525 - 342)       | 206 (238 - 162)    | 3318 (3833 - 2654)     | 66 (94 - 43)       | 39 (47.2 - 29.5)      | 21.1 (24.4 - 16.6)  | 291.9 (335.9 - 231.9)    | 5.8 (8.2 - 3.8)     |
| Ningxia          | 4268 (5204 - 3504)    | 861 (1092 - 664)   | 15864 (20239 - 12618)  | 642 (902 - 409)    | 218.6 (269.1 - 178.8) | 56.4 (70.2 - 43.1)  | 816.7 (1028.7 - 636.6)   | 32.3 (45.7 - 20.7)  |
| Northern Ireland | 10669 (12599 - 9136)  | 1070 (1243 - 901)  | 13713 (15611 - 11899)  | 1506 (2078 - 978)  | 559 (653 - 478.9)     | 52.5 (60.9 - 44.2)  | 691.8 (787.9 - 600.9)    | 79.3 (108.9 - 51.8) |
| Qinghai          | 3151 (3917 - 2482)    | 289 (373 - 233)    | 6197 (7974 - 5030)     | 477 (683 - 307)    | 172.9 (211.7 - 141.4) | 21.7 (28.2 - 17.1)  | 346 (439.6 - 280.8)      | 25.6 (36.7 - 16.7)  |
| Scotland         | 33645 (39373 - 27432) | 4916 (5474 - 4043) | 61351 (68468 - 52004)  | 4760 (6587 - 3085) | 477.5 (555.5 - 392.3) | 64.6 (72.1 - 53.2)  | 832.5 (929.1 - 707.7)    | 68 (93.9 - 44.5)    |
| Tianjin          | 18445 (22213 - 14826) | 4824 (5999 - 3964) | 83017 (106586 - 66429) | 2752 (3844 - 1788) | 286.6 (342.8 - 228.7) | 86.6 (106.8 - 71.2) | 1296.9 (1634.7 - 1057.7) | 42.3 (58.7 - 27.8)  |
| Tibet            | 1164 (1405 - 958)     | 216 (317 - 168)    | 4315 (6314 - 3369)     | 173 (241 - 113)    | 101.5 (124.6 - 83.3)  | 21.8 (32.1 - 16.8)  | 361.9 (527 - 285.5)      | 14.9 (20.5 - 9.7)   |
| Xinjiang         | 16752 (20052 - 13622) | 2041 (2726 - 1574) | 41943 (53974 - 32586)  | 2506 (3495 - 1680) | 228.9 (280 - 183.8)   | 31.2 (41.9 - 24.2)  | 543.7 (701 - 424.9)      | 33.9 (47.4 - 22.5)  |

|              |                       |                     |                          |                     |                       |                      |                        |                    |
|--------------|-----------------------|---------------------|--------------------------|---------------------|-----------------------|----------------------|------------------------|--------------------|
| Yunnan       | 52923 (62996 - 43903) | 5628 (7583 - 4442)  | 111251 (147041 - 87624)  | 7881 (10879 - 5196) | 255.8 (304.5 - 214)   | 31.8 (43.6 - 24.8)   | 526.4 (692.1 - 419.4)  | 37.6 (51.8 - 24.9) |
| Zhejiang     | 57172 (70142 - 46238) | 6210 (10041 - 4811) | 107722 (159078 - 85345)  | 8373 (11830 - 5458) | 184 (229.8 - 148.5)   | 22.4 (37.1 - 17.1)   | 349 (523.4 - 276.6)    | 26.7 (37.9 - 17.6) |
| Yemen        | 2449 (2835 - 2092)    | 2991 (4470 - 1812)  | 68086 (111720 - 38086)   | 379 (526 - 252)     | 56.3 (65.2 - 47.6)    | 101.5 (146.8 - 64.8) | 1592.3 (2418 - 956.3)  | 8.5 (11.8 - 5.7)   |
| South Africa | 25694 (29107 - 22075) | 9714 (11480 - 8234) | 169000 (209681 - 137131) | 3840 (5247 - 2592)  | 124.5 (143.1 - 107)   | 62.4 (73.3 - 53)     | 931.9 (1118.2 - 773.5) | 18.3 (25.3 - 12.4) |
| Zambia       | 1857 (2302 - 1481)    | 1145 (1512 - 781)   | 19526 (24677 - 13342)    | 289 (413 - 188)     | 56.1 (70.4 - 43.9)    | 64.3 (86.4 - 43)     | 830.8 (1090.3 - 566.2) | 8.5 (12.3 - 5.6)   |
| Zimbabwe     | 5157 (6008 - 4467)    | 1782 (2146 - 1501)  | 31261 (37758 - 25988)    | 754 (1038 - 517)    | 121.8 (141.7 - 104.8) | 64.4 (77.8 - 54.4)   | 918 (1097.1 - 769.7)   | 17.4 (24.4 - 12.1) |

Supplementary Table 2. Country-specific burden of ischaemic stroke in 2013 (rates per 100,000 person-years and absolute numbers with 95% uncertainty intervals)

| Country              | Absolute numbers (95% UI) |                       |                          |                      | Rates (95% UI)        |                      |                          |                    |
|----------------------|---------------------------|-----------------------|--------------------------|----------------------|-----------------------|----------------------|--------------------------|--------------------|
|                      | Prevalence                | Deaths                | DALYs                    | YLDs                 | Prevalence            | Deaths               | DALYs                    | YLDs               |
| Afghanistan          | 6711 (7689 - 5859)        | 9134 (13560 - 5011)   | 199655 (320874 - 102001) | 1033 (1431 - 695)    | 57.3 (66.1 - 50.5)    | 132.2 (180.3 - 78.2) | 2149.3 (3174.9 - 1186.6) | 8.5 (11.8 - 5.9)   |
| Angola               | 7206 (8215 - 6202)        | 5204 (7795 - 3778)    | 102040 (155613 - 71528)  | 1103 (1526 - 747)    | 87.1 (99.9 - 74.2)    | 110.6 (159.3 - 82.3) | 1606 (2417.7 - 1162.6)   | 13 (17.8 - 8.8)    |
| Albania              | 4560 (5381 - 3840)        | 1249 (1678 - 836)     | 17145 (23096 - 11764)    | 683 (958 - 455)      | 129.1 (151.8 - 109)   | 38.3 (51.4 - 25.5)   | 500.8 (671.5 - 345.3)    | 19.3 (27 - 12.9)   |
| Andorra              | 667 (768 - 577)           | 48 (65 - 35)          | 458 (603 - 358)          | 94 (127 - 63)        | 496 (571.8 - 427.2)   | 27.5 (37 - 20.3)     | 297.2 (389.8 - 231.9)    | 71.2 (95.8 - 47.8) |
| United Arab Emirates | 1901 (2389 - 1535)        | 315 (441 - 186)       | 8430 (12792 - 4688)      | 311 (448 - 196)      | 58.2 (68.3 - 49.2)    | 65 (84.6 - 42.4)     | 803.8 (1077.6 - 497.2)   | 8.8 (12 - 5.8)     |
| Argentina            | 69138 (81323 - 57314)     | 15944 (23072 - 12773) | 199428 (284333 - 161285) | 10234 (14437 - 6732) | 158.2 (185.3 - 131.5) | 33.5 (48.2 - 26.8)   | 441.1 (627 - 356.5)      | 23.5 (33.2 - 15.5) |
| Armenia              | 1786 (2104 - 1351)        | 2554 (2902 - 2105)    | 31618 (36161 - 26298)    | 271 (378 - 179)      | 54.7 (64.5 - 41.4)    | 74.3 (84.6 - 61.3)   | 945.5 (1079.5 - 787.1)   | 8.3 (11.5 - 5.5)   |
| Antigua and Barbuda  | 185 (224 - 155)           | 44 (55 - 35)          | 664 (830 - 534)          | 27 (37 - 18)         | 255.8 (315.7 - 211.3) | 64.2 (80.6 - 51.5)   | 927.1 (1155.7 - 745.5)   | 36.7 (51.5 - 24)   |



|              |                          |                        |                            |                       |                       |                      |                          |                    |
|--------------|--------------------------|------------------------|----------------------------|-----------------------|-----------------------|----------------------|--------------------------|--------------------|
| Australia    | 108400 (122149 - 95956)  | 9911 (12549 - 8171)    | 91996 (112055 - 78873)     | 15512 (20712 - 10827) | 341.1 (382.9 - 303.2) | 25.3 (31.9 - 21.1)   | 260.3 (316.6 - 222.7)    | 49.2 (66 - 34.1)   |
| Austria      | 80338 (95633 - 67497)    | 4867 (6905 - 3851)     | 54353 (70601 - 44323)      | 11415 (15689 - 7697)  | 542.2 (634.5 - 458)   | 26.5 (37.2 - 21)     | 333.4 (428.8 - 271.5)    | 78 (107.1 - 52.7)  |
| Azerbaijan   | 3971 (4670 - 3266)       | 3176 (3842 - 2415)     | 48082 (59133 - 37427)      | 611 (848 - 400)       | 52.6 (62.5 - 43.1)    | 55.6 (67.1 - 42.3)   | 737.9 (896.1 - 571.5)    | 8 (11 - 5.3)       |
| Burundi      | 2456 (2922 - 2080)       | 1830 (2586 - 728)      | 32107 (45910 - 11997)      | 389 (542 - 259)       | 57.4 (68.6 - 48.6)    | 77.3 (108.6 - 32)    | 1114.4 (1583.9 - 441.2)  | 8.8 (12.2 - 5.9)   |
| Belgium      | 92190 (108378 - 79330)   | 5746 (7971 - 4657)     | 64056 (82201 - 53909)      | 12895 (17439 - 8772)  | 490.1 (565.4 - 422.5) | 23.4 (32.4 - 19.2)   | 303 (386.9 - 255.7)      | 69.5 (94 - 47.2)   |
| Benin        | 4143 (4903 - 3482)       | 2525 (3445 - 1202)     | 49668 (68636 - 21385)      | 632 (890 - 415)       | 90.6 (107.1 - 74.8)   | 95.2 (127.1 - 45.7)  | 1426.3 (1940.5 - 683.1)  | 13.6 (18.8 - 8.9)  |
| Burkina Faso | 5777 (6736 - 4936)       | 2315 (3180 - 982)      | 46477 (65753 - 19144)      | 894 (1244 - 593)      | 87.1 (103.1 - 73.1)   | 60.2 (81.3 - 25.9)   | 935.6 (1282.2 - 397.4)   | 13.1 (18.2 - 8.8)  |
| Bangladesh   | 186215 (209306 - 158100) | 84050 (109295 - 43324) | 1267334 (1688535 - 658458) | 27539 (37706 - 18424) | 190.3 (213.8 - 159.1) | 121.7 (156.2 - 62.9) | 1617.2 (2129.5 - 841.2)  | 27.8 (38.1 - 18.8) |
| Bulgaria     | 15539 (18817 - 12968)    | 18785 (20809 - 15321)  | 225492 (250160 - 187685)   | 2289 (3209 - 1550)    | 131.3 (158.1 - 109.9) | 132.8 (147 - 108.5)  | 1658.8 (1844.6 - 1378.2) | 19.5 (27.4 - 13.2) |
| Bahrain      | 422 (512 - 354)          | 111 (138 - 85)         | 1944 (2456 - 1392)         | 66 (96 - 44)          | 53.9 (65 - 45.3)      | 39.6 (48 - 31)       | 466.7 (576.9 - 356.3)    | 8.1 (11.6 - 5.4)   |

|                        |                          |                       |                            |                       |                       |                     |                          |                     |
|------------------------|--------------------------|-----------------------|----------------------------|-----------------------|-----------------------|---------------------|--------------------------|---------------------|
| The Bahamas            | 870 (982 - 742)          | 194 (233 - 154)       | 3172 (3859 - 2505)         | 126 (172 - 86)        | 272.8 (310.2 - 232.1) | 68.8 (82.6 - 55.2)  | 1000.8 (1210.3 - 795.9)  | 39 (53.6 - 27)      |
| Bosnia and Herzegovina | 6966 (8153 - 5862)       | 5158 (6256 - 3522)    | 65953 (81208 - 42839)      | 1035 (1437 - 701)     | 130.1 (152.7 - 110.7) | 96.9 (117.4 - 66.8) | 1176.1 (1447.3 - 766.5)  | 19.4 (27 - 13.2)    |
| Belarus                | 26884 (31549 - 22763)    | 16641 (19185 - 14442) | 236651 (284827 - 205477)   | 4066 (5625 - 2698)    | 207.2 (242.2 - 177.4) | 114 (131.9 - 98.8)  | 1698.2 (2049.3 - 1474.3) | 31.5 (43.5 - 20.9)  |
| Belize                 | 412 (473 - 351)          | 112 (135 - 94)        | 1917 (2381 - 1579)         | 60 (82 - 40)          | 264.1 (307.7 - 224.1) | 79.2 (94.6 - 66.7)  | 1224.8 (1497 - 1015.3)   | 37.9 (52.4 - 25)    |
| Bolivia                | 4845 (5637 - 4178)       | 1872 (2386 - 1465)    | 32273 (41961 - 24665)      | 739 (1020 - 498)      | 76.8 (89.3 - 65.9)    | 39.3 (49.3 - 30.9)  | 554.4 (707.2 - 428.8)    | 11.6 (15.9 - 7.9)   |
| Brazil                 | 321815 (374036 - 273429) | 74818 (88800 - 64648) | 1043708 (1230889 - 886779) | 47526 (64448 - 32459) | 186.3 (217.5 - 158)   | 49.2 (58.2 - 42.7)  | 647.7 (761.2 - 552.6)    | 27.3 (36.8 - 18.7)  |
| Barbados               | 855 (979 - 726)          | 190 (247 - 153)       | 2632 (3297 - 2157)         | 123 (164 - 84)        | 261.4 (299.3 - 222.4) | 60.1 (78.2 - 48.3)  | 812.9 (1017.3 - 666.3)   | 37.5 (50.3 - 25.7)  |
| Brunei                 | 1266 (1507 - 1066)       | 80 (99 - 66)          | 1368 (1694 - 1134)         | 190 (264 - 128)       | 509.6 (616.4 - 414)   | 50.6 (62.1 - 41.9)  | 627 (760.3 - 525.2)      | 74.6 (103.7 - 50.2) |
| Bhutan                 | 858 (1002 - 737)         | 276 (392 - 161)       | 4196 (6253 - 2394)         | 128 (178 - 86)        | 185.9 (216.8 - 158.9) | 81 (113.4 - 48.1)   | 1090.8 (1597.4 - 633.4)  | 27.4 (38.1 - 18.4)  |
| Botswana               | 1319 (1520 - 1121)       | 240 (404 - 156)       | 3883 (6453 - 2490)         | 196 (265 - 132)       | 127.6 (148.2 - 107.8) | 36.3 (60 - 24)      | 450.4 (762.4 - 287.1)    | 18.6 (25.8 - 12.6)  |

|                                  |                             |                          |                               |                          |                       |                       |                          |                      |
|----------------------------------|-----------------------------|--------------------------|-------------------------------|--------------------------|-----------------------|-----------------------|--------------------------|----------------------|
| Central African Republic         | 1938 (2266 - 1543)          | 1356 (2001 - 513)        | 23848 (36231 - 8644)          | 293 (405 - 194)          | 84.6 (99.8 - 66.7)    | 84.9 (124.6 - 32.6)   | 1238.5 (1830.3 - 467.2)  | 12.5 (17.2 - 8.2)    |
| Canada                           | 399440 (472829 - 346474)    | 9693 (12282 - 7664)      | 137104 (167209 - 110955)      | 57007 (79385 - 38122)    | 752.6 (889.4 - 650.7) | 15.6 (19.6 - 12.3)    | 248 (302.3 - 200.5)      | 108.1 (150.2 - 72.3) |
| Switzerland                      | 69478 (81037 - 59585)       | 4254 (5381 - 3398)       | 42423 (51230 - 35156)         | 9648 (12989 - 6578)      | 525.5 (605 - 454.9)   | 25.2 (31.7 - 20.2)    | 284.5 (343.3 - 234.3)    | 73.9 (99.6 - 50.3)   |
| Chile                            | 29628 (33633 - 25422)       | 6067 (8192 - 5015)       | 73325 (98473 - 60610)         | 4420 (5929 - 2949)       | 160.2 (182.4 - 137.4) | 33.7 (45.5 - 28)      | 406.8 (544.6 - 336.9)    | 23.8 (31.9 - 15.9)   |
| China                            | 2358351 (2466479 - 2241714) | 735976 (849199 - 554471) | 10653208 (12546385 - 8141339) | 351671 (466293 - 246177) | 174 (181.5 - 165.4)   | 62.9 (72.1 - 47.1)    | 816.5 (954.6 - 619.6)    | 25.8 (34.2 - 18.2)   |
| Cote d'Ivoire                    | 8628 (10328 - 7068)         | 7064 (8778 - 4792)       | 146814 (187848 - 94300)       | 1310 (1861 - 858)        | 89.8 (110 - 72.3)     | 122.8 (149.9 - 87.5)  | 1900.6 (2353.7 - 1292.1) | 13.4 (19.1 - 8.7)    |
| Cameroon                         | 8934 (10377 - 7853)         | 7169 (9022 - 4606)       | 131895 (167597 - 80530)       | 1356 (1860 - 920)        | 91.3 (106 - 80.2)     | 107.7 (135.4 - 70.7)  | 1622.1 (2051.5 - 1017.6) | 13.6 (18.4 - 9.3)    |
| Democratic Republic of the Congo | 24100 (28659 - 20231)       | 15499 (21142 - 7496)     | 301210 (414728 - 144768)      | 3637 (5056 - 2388)       | 84 (100.9 - 70.3)     | 91.4 (125.4 - 44.4)   | 1339.2 (1831.2 - 648.6)  | 12.3 (17.3 - 8.1)    |
| Congo                            | 1741 (2012 - 1493)          | 1814 (2167 - 1389)       | 31652 (39117 - 23725)         | 267 (369 - 180)          | 82.5 (95.2 - 70.1)    | 130.7 (155.3 - 101.7) | 1901 (2295.5 - 1443.2)   | 12.4 (17.2 - 8.4)    |
| Colombia                         | 15203 (18903 - 11748)       | 4644 (7113 - 3573)       | 69708 (104293 - 53291)        | 2288 (3251 - 1490)       | 43.7 (54.2 - 33.6)    | 16 (24.5 - 12.3)      | 210.6 (317.4 - 161.3)    | 6.5 (9.2 - 4.2)      |

|                |                            |                       |                          |                          |                       |                     |                         |                     |
|----------------|----------------------------|-----------------------|--------------------------|--------------------------|-----------------------|---------------------|-------------------------|---------------------|
| Comoros        | 211 (259 - 167)            | 187 (269 - 73)        | 3359 (5004 - 1274)       | 33 (48 - 21)             | 60.2 (73.9 - 49.4)    | 95.6 (134.4 - 38)   | 1384.6 (2003.7 - 541.1) | 9.2 (13.2 - 6)      |
| Cape Verde     | 289 (332 - 247)            | 300 (441 - 218)       | 4193 (6232 - 2919)       | 44 (61 - 29)             | 88.6 (102.3 - 75.2)   | 97.5 (143 - 70.7)   | 1355.1 (2009.9 - 942.4) | 13.4 (18.5 - 8.8)   |
| Costa Rica     | 1677 (2050 - 1369)         | 505 (857 - 347)       | 6228 (10612 - 4456)      | 253 (354 - 165)          | 42.7 (52.1 - 34.7)    | 14.2 (24.1 - 9.7)   | 165 (280.3 - 118)       | 6.4 (9 - 4.1)       |
| Cuba           | 39266 (45592 - 32858)      | 7542 (8802 - 5527)    | 90822 (105713 - 66453)   | 5608 (7743 - 3774)       | 260.9 (302.1 - 219.5) | 48.4 (56.5 - 35.4)  | 598.6 (697.3 - 435.5)   | 37.4 (51.7 - 25.4)  |
| Cyprus         | 6007 (6912 - 4907)         | 333 (415 - 283)       | 3741 (4473 - 3225)       | 858 (1189 - 578)         | 509.2 (584.2 - 416)   | 25 (31.1 - 21.3)    | 302.6 (361.9 - 260.3)   | 73.1 (101.8 - 49.1) |
| Czech Republic | 21042 (24679 - 17558)      | 14631 (18635 - 12787) | 153381 (190096 - 134851) | 3070 (4237 - 2086)       | 132.3 (154.5 - 111.3) | 80.5 (102.4 - 70.5) | 876.9 (1080.6 - 771.4)  | 19.5 (26.9 - 13.3)  |
| Germany        | 1113289 (1226255 - 985115) | 52987 (68993 - 43056) | 644502 (775506 - 545741) | 155877 (207428 - 109650) | 688.5 (754.9 - 615.9) | 26.8 (34.7 - 21.9)  | 365.2 (436.9 - 309.4)   | 97.7 (130.8 - 68.6) |
| Djibouti       | 294 (359 - 239)            | 303 (477 - 205)       | 5210 (8524 - 3358)       | 46 (68 - 30)             | 58.7 (72.3 - 48.3)    | 99.5 (150.3 - 68.6) | 1411.6 (2243.3 - 942.3) | 9.1 (12.9 - 5.8)    |
| Dominica       | 164 (191 - 140)            | 39 (48 - 30)          | 562 (706 - 446)          | 24 (32 - 16)             | 257.6 (298.7 - 217)   | 61.6 (76.2 - 47.4)  | 883.1 (1111.8 - 699.5)  | 36.9 (50.4 - 25.2)  |
| Denmark        | 58947 (67370 - 51868)      | 2846 (3370 - 2191)    | 36115 (41825 - 28750)    | 8433 (11341 - 5787)      | 652.1 (740.8 - 577.5) | 28.2 (33.2 - 21.6)  | 380.9 (441 - 302.2)     | 94 (126.3 - 64.3)   |

|                    |                          |                       |                          |                       |                       |                     |                          |                    |
|--------------------|--------------------------|-----------------------|--------------------------|-----------------------|-----------------------|---------------------|--------------------------|--------------------|
| Dominican Republic | 20209 (24190 - 17045)    | 4742 (6169 - 3843)    | 70998 (96213 - 56652)    | 2922 (4070 - 1968)    | 278.9 (337.3 - 232.5) | 67.9 (88.5 - 55.1)  | 980.5 (1314.9 - 781.5)   | 40.1 (55.8 - 27.1) |
| Algeria            | 15457 (18021 - 13510)    | 12246 (14229 - 10330) | 178955 (210402 - 149241) | 2394 (3263 - 1581)    | 58.8 (68.6 - 51.1)    | 71.9 (83.5 - 60.9)  | 877.7 (1023.1 - 739.2)   | 8.9 (12.3 - 5.9)   |
| Ecuador            | 9376 (10973 - 7971)      | 3333 (4483 - 2709)    | 48766 (69376 - 38146)    | 1424 (2002 - 963)     | 80.7 (95 - 68.3)      | 31.2 (41.6 - 25.4)  | 425.8 (595.9 - 335.7)    | 12.1 (17.2 - 8.2)  |
| Egypt              | 32294 (36613 - 27497)    | 40841 (48869 - 35648) | 687030 (834869 - 597222) | 4939 (6777 - 3289)    | 55.8 (63.4 - 47.3)    | 95.1 (113.2 - 83.4) | 1359.6 (1641.5 - 1184.9) | 8.4 (11.7 - 5.6)   |
| Eritrea            | 1493 (1776 - 1235)       | 1112 (1695 - 625)     | 21277 (33023 - 11989)    | 234 (325 - 157)       | 56.7 (66.8 - 47.5)    | 90.5 (134.8 - 50.9) | 1310.9 (1991.6 - 739.9)  | 8.6 (11.7 - 5.8)   |
| Spain              | 382317 (433316 - 328797) | 25177 (34969 - 20608) | 259179 (336619 - 217480) | 53915 (74275 - 36733) | 492.2 (556.2 - 428.5) | 23.9 (33 - 19.6)    | 289.7 (372.2 - 243.4)    | 70.4 (97.3 - 47.9) |
| Estonia            | 4757 (5596 - 3957)       | 1628 (2277 - 1313)    | 19362 (25734 - 16053)    | 717 (985 - 485)       | 241.6 (282.2 - 204)   | 63 (87.3 - 51.2)    | 831.4 (1099.7 - 690.3)   | 36.8 (50.6 - 24.8) |
| Ethiopia           | 14419 (16188 - 12930)    | 23264 (33336 - 9603)  | 374503 (542326 - 149867) | 2349 (3230 - 1582)    | 33.1 (37.1 - 29.6)    | 82.3 (118 - 34.5)   | 1138.8 (1638.6 - 464)    | 5.3 (7.2 - 3.6)    |
| Finland            | 43307 (49178 - 37821)    | 3772 (4851 - 3220)    | 40498 (48853 - 34914)    | 5980 (8176 - 4055)    | 451.7 (508.9 - 397.9) | 32.3 (41.1 - 27.6)  | 388.1 (464.1 - 333.8)    | 63.3 (86.6 - 42.8) |
| Fiji               | 843 (1010 - 684)         | 194 (264 - 152)       | 3988 (5476 - 3059)       | 126 (177 - 82)        | 153.1 (184.8 - 120.7) | 47.1 (63.5 - 37.2)  | 728.2 (985.8 - 572.5)    | 22.4 (31.6 - 14.6) |

|                                |                          |                       |                          |                        |                       |                       |                          |                     |
|--------------------------------|--------------------------|-----------------------|--------------------------|------------------------|-----------------------|-----------------------|--------------------------|---------------------|
| France                         | 519865 (608617 - 434398) | 27481 (36083 - 22373) | 293186 (354625 - 244491) | 74259 (100001 - 49580) | 481.6 (560.4 - 410.7) | 18.1 (23.3 - 14.8)    | 238.6 (285.7 - 197)      | 69.9 (94.3 - 47)    |
| Federated States of Micronesia | 81 (92 - 71)             | 31 (46 - 20)          | 606 (961 - 362)          | 12 (17 - 8)            | 156.8 (180.3 - 137.2) | 70.8 (101.5 - 48.3)   | 1147.2 (1746.4 - 715.7)  | 23.1 (31.7 - 15.3)  |
| Gabon                          | 824 (947 - 700)          | 1120 (1391 - 832)     | 18162 (24046 - 12440)    | 124 (171 - 81)         | 83.8 (96.9 - 70.6)    | 135 (167.8 - 101.1)   | 2023.3 (2632.4 - 1429.8) | 12.5 (17.2 - 8.1)   |
| United Kingdom                 | 594093 (620029 - 566417) | 34270 (42656 - 29644) | 373161 (447586 - 321751) | 83758 (110026 - 58977) | 576.3 (601.1 - 549.9) | 26.7 (33.1 - 23.1)    | 329.7 (393.1 - 281.7)    | 82.2 (108.3 - 57.9) |
| Georgia                        | 3162 (3797 - 2569)       | 4850 (6266 - 4108)    | 64297 (83304 - 53962)    | 481 (661 - 313)        | 53.4 (63.7 - 43.6)    | 73.3 (94.7 - 62.1)    | 1016.1 (1318.3 - 849.2)  | 8.2 (11.3 - 5.3)    |
| Ghana                          | 11696 (13477 - 9909)     | 11435 (13912 - 8183)  | 212351 (259952 - 151950) | 1802 (2489 - 1162)     | 90.6 (105.5 - 75.3)   | 133 (162 - 95.3)      | 2004.6 (2439.4 - 1438.7) | 13.7 (18.9 - 8.8)   |
| Guinea                         | 4891 (5702 - 4223)       | 3831 (4868 - 2577)    | 76825 (99732 - 51006)    | 752 (1042 - 507)       | 89.2 (105.7 - 77.1)   | 113 (141.3 - 76.6)    | 1732.6 (2202.1 - 1173.4) | 13.3 (18.3 - 9)     |
| The Gambia                     | 653 (749 - 565)          | 440 (669 - 248)       | 8436 (13169 - 4410)      | 100 (139 - 69)         | 93.2 (106.6 - 80.7)   | 108.2 (155.3 - 64.6)  | 1605 (2448.6 - 892)      | 14 (18.9 - 9.6)     |
| Guinea-Bissau                  | 725 (839 - 610)          | 748 (1111 - 488)      | 16404 (25244 - 10356)    | 110 (152 - 74)         | 90.4 (105.9 - 76.7)   | 147.7 (211.1 - 100.8) | 2411.9 (3570.8 - 1583.1) | 13.4 (18.3 - 9.1)   |
| Equatorial Guinea              | 345 (428 - 288)          | 231 (349 - 166)       | 4522 (7215 - 2995)       | 53 (76 - 34)           | 87.2 (108.8 - 73)     | 103 (152.5 - 77.2)    | 1485.9 (2276.9 - 1059.6) | 13 (18.5 - 8.5)     |

|                                                  |                          |                          |                             |                       |                       |                       |                          |                    |
|--------------------------------------------------|--------------------------|--------------------------|-----------------------------|-----------------------|-----------------------|-----------------------|--------------------------|--------------------|
| Greece                                           | 108721 (130162 - 84676)  | 13667 (17393 - 11514)    | 135854 (166832 - 114006)    | 15361 (21823 - 10251) | 518.7 (611.3 - 408.3) | 50.9 (64.9 - 42.8)    | 559.1 (686.1 - 467.5)    | 74.3 (104.4 - 50)  |
| Grenada                                          | 210 (246 - 174)          | 71 (85 - 62)             | 1056 (1259 - 909)           | 30 (42 - 20)          | 261 (307.1 - 215.1)   | 87.1 (105 - 75.4)     | 1312.7 (1565.3 - 1126.5) | 37.4 (51.8 - 25.1) |
| Guatemala                                        | 3279 (4189 - 2660)       | 1436 (1880 - 1143)       | 24303 (31740 - 19623)       | 480 (699 - 308)       | 43 (55.4 - 34.6)      | 20.1 (26.5 - 16)      | 297.8 (383.6 - 240.9)    | 6.2 (9.2 - 4)      |
| Guyana                                           | 928 (1094 - 801)         | 396 (511 - 315)          | 8255 (11091 - 6355)         | 136 (188 - 91)        | 269.7 (319.4 - 236)   | 138.9 (172.6 - 112.1) | 2293.2 (2980.4 - 1817.9) | 38.6 (53 - 26.1)   |
| Hong Kong Special Administrative Region of China | 27091 (32097 - 22750)    | 2893 (4035 - 2318)       | 31997 (42902 - 25923)       | 4018 (5573 - 2593)    | 255.2 (303.7 - 213.2) | 24.5 (34.1 - 19.7)    | 291.6 (389.8 - 237.1)    | 37.9 (52.7 - 24.4) |
| Honduras                                         | 2075 (2537 - 1666)       | 2529 (3339 - 1866)       | 41631 (57665 - 30075)       | 309 (425 - 201)       | 50 (61.3 - 40)        | 66.3 (87.4 - 49.2)    | 976.9 (1332 - 708)       | 7.4 (10.1 - 4.8)   |
| Croatia                                          | 9201 (10846 - 7830)      | 6601 (7420 - 5795)       | 70659 (79435 - 62332)       | 1364 (1900 - 929)     | 134.6 (158.5 - 113.9) | 78.1 (87.7 - 68.5)    | 874.4 (984.7 - 765.7)    | 20.2 (28.1 - 13.7) |
| Haiti                                            | 13832 (16383 - 11896)    | 5104 (6299 - 4136)       | 100616 (126329 - 80331)     | 2004 (2777 - 1353)    | 271.9 (329.7 - 232.2) | 112.5 (138.4 - 92.1)  | 1850.1 (2292 - 1491.2)   | 38.7 (53.6 - 26.3) |
| Hungary                                          | 21851 (25869 - 18328)    | 13810 (16752 - 11819)    | 162939 (195136 - 139151)    | 3235 (4478 - 2215)    | 143.9 (169.6 - 120.9) | 75.5 (91.3 - 64.5)    | 958.5 (1142.2 - 815.7)   | 21.5 (29.7 - 14.7) |
| Indonesia                                        | 270100 (316824 - 227570) | 152842 (174086 - 123947) | 2530467 (2900622 - 2061858) | 40444 (55705 - 26973) | 178.7 (210.6 - 148.1) | 127 (144.6 - 102.3)   | 1756.8 (2002.6 - 1419.3) | 26.3 (36.3 - 17.2) |

|         |                                   |                             |                                   |                             |                          |                        |                             |                        |
|---------|-----------------------------------|-----------------------------|-----------------------------------|-----------------------------|--------------------------|------------------------|-----------------------------|------------------------|
| India   | 1595087<br>(1897410 -<br>1349519) | 332770 (409620 -<br>249102) | 5897810<br>(7399023 -<br>4426760) | 237729 (323368 -<br>158111) | 177.9 (212 -<br>148.9)   | 53.7 (65.2 - 40.2)     | 793.4 (981.6 -<br>600.3)    | 26.1 (35.3 - 17.3)     |
| Ireland | 28308 (33400 -<br>22775)          | 1463 (1890 -<br>1191)       | 17358 (21521 -<br>14538)          | 4063 (5606 -<br>2678)       | 510.8 (599.8 -<br>412.4) | 24.7 (31.9 - 20.2)     | 305.7 (377.4 -<br>256.5)    | 73.5 (101.4 -<br>48.5) |
| Iran    | 41018 (46407 -<br>35962)          | 16394 (19891 -<br>10036)    | 217021 (269256 -<br>127287)       | 6309 (8643 -<br>4313)       | 74.4 (84.7 - 65.6)       | 42 (50.9 - 25.7)       | 484.8 (592.3 -<br>290.9)    | 11.3 (15.4 - 7.9)      |
| Iraq    | 8620 (10158 -<br>7315)            | 9987 (12064 -<br>7733)      | 170464 (210750 -<br>128978)       | 1330 (1840 - 912)           | 54 (63.7 - 46.5)         | 96.5 (115.7 -<br>75.9) | 1365.1 (1667.6 -<br>1045.8) | 8.1 (11.2 - 5.7)       |
| Iceland | 2129 (2482 -<br>1811)             | 106 (127 - 82)              | 1203 (1429 - 978)                 | 303 (413 - 204)             | 512.8 (594.3 -<br>439.6) | 21.4 (25.7 - 16.7)     | 273 (325 - 221.3)           | 73.4 (99.8 - 49.5)     |
| Israel  | 31809 (36007 -<br>27009)          | 1527 (1893 - 969)           | 17950 (21674 -<br>12535)          | 4512 (6075 -<br>3102)       | 381.6 (431.4 -<br>326.1) | 16 (19.8 - 10.1)       | 206 (249.1 -<br>145.6)      | 54.5 (73.1 - 37.9)     |
| Italy   | 376734 (439136 -<br>308313)       | 42249 (54099 -<br>35128)    | 389879 (484070 -<br>332428)       | 53411 (72784 -<br>36509)    | 319.7 (363.8 -<br>273.5) | 25.5 (32.7 - 21.3)     | 272.8 (337.1 -<br>232.7)    | 46.2 (62 - 31.5)       |
| Jamaica | 6165 (7356 -<br>5222)             | 1840 (2209 -<br>1460)       | 23819 (28857 -<br>19108)          | 889 (1210 - 602)            | 259.7 (310.3 -<br>219)   | 76.2 (91.5 - 60.4)     | 1008.6 (1222.8 -<br>807.1)  | 37.4 (51.2 - 25.2)     |
| Jordan  | 2212 (2595 -<br>1848)             | 1436 (1651 -<br>1212)       | 21894 (25903 -<br>18141)          | 342 (484 - 227)             | 58.1 (67.4 - 47.6)       | 72.4 (82.7 - 61.1)     | 841 (972.7 - 707)           | 8.7 (12.4 - 5.9)       |
| Japan   | 1322597<br>(1550582 -<br>1109990) | 117571 (156199 -<br>98197)  | 1116524<br>(1414590 -<br>956082)  | 190779 (260459 -<br>129962) | 460 (529.1 -<br>393.5)   | 30.1 (39.7 - 25.1)     | 339.4 (425.1 -<br>289.1)    | 67.5 (92 - 46.1)       |



|             |                          |                       |                          |                       |                       |                       |                          |                     |
|-------------|--------------------------|-----------------------|--------------------------|-----------------------|-----------------------|-----------------------|--------------------------|---------------------|
| Kazakhstan  | 7672 (8773 - 6545)       | 16335 (18793 - 12758) | 269147 (315928 - 213174) | 1174 (1636 - 805)     | 55.6 (64 - 47.7)      | 150.9 (172.9 - 116.9) | 2171.7 (2526 - 1717.7)   | 8.4 (11.6 - 5.8)    |
| Kenya       | 11490 (14047 - 9102)     | 5283 (7250 - 2994)    | 80562 (110970 - 45914)   | 1811 (2521 - 1163)    | 58.4 (70.1 - 46)      | 49.4 (67.5 - 27.9)    | 627 (862.1 - 352.2)      | 9 (12.5 - 5.8)      |
| Kyrgyzstan  | 1866 (2162 - 1601)       | 3507 (4059 - 3062)    | 59549 (68788 - 51114)    | 289 (402 - 193)       | 55.2 (64 - 47.1)      | 136.6 (159.6 - 118.8) | 2046.5 (2358.2 - 1765.1) | 8.4 (11.6 - 5.7)    |
| Cambodia    | 16405 (19520 - 13296)    | 9129 (10696 - 6804)   | 136118 (163383 - 100313) | 2214 (3101 - 1461)    | 183 (219.5 - 147.6)   | 107 (125.2 - 80.2)    | 1517.2 (1812.6 - 1128.4) | 24.3 (34.3 - 15.9)  |
| Kiribati    | 80 (92 - 68)             | 35 (46 - 25)          | 836 (1116 - 577)         | 12 (16 - 8)           | 158.8 (181 - 132.9)   | 76.6 (96 - 56.8)      | 1412.3 (1821.1 - 1013.1) | 23.1 (31.5 - 15.4)  |
| South Korea | 361372 (405048 - 320620) | 30523 (35732 - 24705) | 368400 (426519 - 299275) | 52544 (72170 - 36003) | 586.1 (656.8 - 520.1) | 53.2 (62.2 - 43.1)    | 614.9 (710.9 - 499.5)    | 85.1 (116.9 - 58.2) |
| Kuwait      | 1042 (1222 - 886)        | 383 (447 - 288)       | 6616 (7829 - 4947)       | 164 (228 - 106)       | 59.2 (68.7 - 51.5)    | 52.7 (61.2 - 40.3)    | 613.5 (712.3 - 463.1)    | 9 (12.2 - 6)        |
| Laos        | 5169 (6034 - 4548)       | 2574 (3631 - 1738)    | 46015 (69108 - 29662)    | 761 (1063 - 524)      | 174.7 (206.7 - 152.5) | 108 (146.7 - 74.7)    | 1566.8 (2269.8 - 1051.4) | 25.3 (35.5 - 17.2)  |
| Lebanon     | 2441 (2805 - 2073)       | 1174 (1639 - 352)     | 14236 (20097 - 4212)     | 371 (513 - 248)       | 55.4 (63.6 - 47)      | 31.6 (44.2 - 9.4)     | 352.3 (493.3 - 104.8)    | 8.4 (11.5 - 5.6)    |
| Liberia     | 1785 (2091 - 1528)       | 1465 (1797 - 1045)    | 28917 (36179 - 20615)    | 267 (366 - 181)       | 91.9 (107.8 - 77.8)   | 125.7 (153.1 - 92.2)  | 1899.4 (2333.2 - 1351.7) | 13.3 (18.4 - 9.1)   |

|                                              |                       |                     |                          |                    |                       |                     |                         |                     |
|----------------------------------------------|-----------------------|---------------------|--------------------------|--------------------|-----------------------|---------------------|-------------------------|---------------------|
| Libya                                        | 507 (621 - 389)       | 2012 (2465 - 1559)  | 29312 (36396 - 22396)    | 82 (119 - 53)      | 12.7 (15.5 - 10)      | 73.8 (90.5 - 57.2)  | 910.3 (1125.1 - 702.2)  | 2 (3 - 1.3)         |
| Saint Lucia                                  | 476 (550 - 403)       | 123 (149 - 93)      | 1661 (2016 - 1289)       | 68 (92 - 45)       | 281.4 (324.3 - 238.6) | 71.2 (86.3 - 54.3)  | 990.2 (1205 - 767.6)    | 40.4 (54.8 - 26.8)  |
| Sri Lanka                                    | 35492 (41391 - 29095) | 9044 (11763 - 4657) | 136614 (175337 - 76831)  | 5237 (7264 - 3434) | 188.2 (219.9 - 154.1) | 55.8 (73.1 - 28.2)  | 743.8 (952.9 - 412.7)   | 27.6 (38.2 - 18)    |
| Lesotho                                      | 1346 (1575 - 1159)    | 589 (779 - 415)     | 10416 (13711 - 7323)     | 198 (272 - 131)    | 130.3 (153.8 - 111.7) | 68.7 (90.8 - 48.4)  | 1078.7 (1425.9 - 758.6) | 18.9 (26.1 - 12.5)  |
| Lithuania                                    | 7799 (9269 - 6390)    | 4137 (4667 - 3274)  | 48163 (53851 - 39201)    | 1162 (1610 - 802)  | 173.9 (204 - 144.3)   | 69 (77.6 - 55)      | 894.7 (1003.6 - 735.7)  | 26.2 (36 - 18)      |
| Luxembourg                                   | 3990 (4593 - 3433)    | 247 (359 - 193)     | 2816 (3848 - 2272)       | 562 (761 - 385)    | 527.7 (605.9 - 454.5) | 27 (39.1 - 21.3)    | 346.3 (473.2 - 280.8)   | 75.1 (101.3 - 51.1) |
| Latvia                                       | 6576 (7564 - 5548)    | 3952 (4407 - 3429)  | 45971 (51206 - 40013)    | 987 (1356 - 651)   | 212.7 (243.6 - 178.5) | 96.4 (107.3 - 83.5) | 1223.1 (1362.4 - 1061)  | 32.3 (44.4 - 21)    |
| Macao Special Administrative Region of China | 1039 (1226 - 830)     | 145 (203 - 92)      | 1797 (2473 - 1195)       | 154 (217 - 102)    | 187.7 (222.6 - 149.3) | 30.9 (43 - 19.6)    | 354.4 (485 - 238.7)     | 27.6 (38.5 - 18)    |
| Morocco                                      | 13479 (15258 - 11472) | 7951 (9829 - 6526)  | 128118 (160844 - 104464) | 2076 (2857 - 1382) | 57.4 (65.4 - 49.5)    | 48.4 (59.5 - 39.8)  | 658.6 (822.4 - 536.8)   | 8.7 (11.8 - 5.8)    |
| Moldova                                      | 8938 (10884 - 7150)   | 3353 (3768 - 2552)  | 50048 (56793 - 38111)    | 1356 (1862 - 906)  | 209.2 (253 - 167.3)   | 84.2 (94.7 - 64.4)  | 1196.6 (1356.4 - 910.8) | 31.7 (43.6 - 21)    |

|                  |                       |                       |                          |                     |                       |                       |                          |                     |
|------------------|-----------------------|-----------------------|--------------------------|---------------------|-----------------------|-----------------------|--------------------------|---------------------|
| Madagascar       | 6658 (7865 - 5498)    | 10649 (14005 - 6421)  | 200073 (268536 - 114705) | 1036 (1419 - 690)   | 63.3 (76.9 - 51.4)    | 167.7 (214.4 - 103.3) | 2500.4 (3291.1 - 1484.8) | 9.6 (13.4 - 6.4)    |
| Maldives         | 337 (391 - 289)       | 93 (111 - 70)         | 1288 (1563 - 986)        | 50 (70 - 34)        | 182.3 (212.3 - 155.5) | 59.5 (71.7 - 43.8)    | 711.6 (858.3 - 543.5)    | 26.6 (36.9 - 18.2)  |
| Mexico           | 36858 (38819 - 35026) | 12218 (15927 - 10716) | 181850 (239593 - 157869) | 5589 (7482 - 3922)  | 42.3 (44.6 - 40.1)    | 15.4 (19.9 - 13.4)    | 210.9 (279.1 - 184.2)    | 6.3 (8.5 - 4.4)     |
| Marshall Islands | 44 (50 - 39)          | 17 (22 - 10)          | 362 (494 - 207)          | 7 (9 - 5)           | 147 (167.8 - 127.9)   | 68.1 (88.1 - 43.1)    | 1116.1 (1474.3 - 672.3)  | 21.6 (29.6 - 14.7)  |
| Macedonia        | 3523 (4154 - 2845)    | 4118 (4487 - 3593)    | 49450 (54225 - 43110)    | 528 (738 - 347)     | 134.1 (157.9 - 109)   | 173.6 (189.3 - 151.6) | 1965.4 (2153.6 - 1719.9) | 20.1 (28 - 13.3)    |
| Mali             | 5362 (6188 - 4688)    | 4046 (5114 - 2443)    | 81696 (104740 - 49271)   | 824 (1142 - 555)    | 89.9 (104.2 - 77.4)   | 104.2 (132 - 62.4)    | 1625.3 (2059.2 - 972.4)  | 13.4 (18.6 - 9)     |
| Malta            | 3381 (4027 - 2773)    | 181 (214 - 143)       | 2321 (2719 - 1941)       | 482 (676 - 320)     | 507.3 (602.3 - 418.6) | 30.3 (35.8 - 23.5)    | 357.8 (418.8 - 297.1)    | 72.3 (101.2 - 47.9) |
| Myanmar          | 59795 (68780 - 51401) | 27933 (41425 - 12648) | 458839 (731173 - 208518) | 8781 (12031 - 5928) | 179.4 (207.6 - 153.8) | 108.1 (155.2 - 49.5)  | 1482.3 (2241.3 - 682.5)  | 25.9 (35.2 - 17.6)  |
| Montenegro       | 1046 (1217 - 873)     | 415 (507 - 279)       | 5749 (6971 - 4017)       | 156 (218 - 104)     | 130.5 (150.8 - 109.4) | 53.8 (65.9 - 35.7)    | 717.6 (867.9 - 501.2)    | 19.5 (27.1 - 13)    |
| Mongolia         | 835 (976 - 699)       | 544 (701 - 446)       | 10850 (14568 - 8903)     | 131 (182 - 85)      | 49.4 (58.8 - 40.4)    | 50.5 (63.5 - 41.1)    | 763.9 (985.5 - 632)      | 7.6 (10.6 - 4.9)    |

|             |                        |                       |                          |                      |                       |                     |                          |                    |
|-------------|------------------------|-----------------------|--------------------------|----------------------|-----------------------|---------------------|--------------------------|--------------------|
| Mozambique  | 7063 (8588 - 5608)     | 4599 (6180 - 2881)    | 81406 (107216 - 53083)   | 1092 (1546 - 718)    | 59.6 (72.7 - 47.5)    | 59 (79.8 - 36.8)    | 876.2 (1163.2 - 565)     | 9 (12.7 - 5.9)     |
| Mauritania  | 1758 (2028 - 1530)     | 1256 (1599 - 811)     | 23987 (31253 - 14540)    | 269 (378 - 177)      | 94 (108.4 - 82.5)     | 110.5 (138.9 - 72)  | 1653.5 (2110.7 - 1061.4) | 14 (19.6 - 9.3)    |
| Mauritius   | 2226 (2531 - 1903)     | 900 (1038 - 770)      | 13283 (15403 - 11113)    | 329 (445 - 224)      | 186.4 (214.8 - 159.3) | 88.5 (102 - 76)     | 1167.5 (1346.8 - 992.5)  | 27.3 (37.3 - 18.7) |
| Malawi      | 3944 (4659 - 3240)     | 2246 (3274 - 914)     | 36938 (54441 - 15001)    | 617 (862 - 412)      | 54.8 (66.9 - 45.3)    | 53 (76.1 - 22)      | 705.6 (1024.5 - 292.5)   | 8.4 (11.8 - 5.5)   |
| Malaysia    | 36568 (41054 - 31628)  | 7658 (9931 - 6486)    | 132771 (171026 - 112624) | 5423 (7456 - 3650)   | 202.6 (229.3 - 172.9) | 53.9 (70.1 - 45.4)  | 761.6 (965.9 - 647.1)    | 29.5 (40.5 - 20)   |
| Namibia     | 1424 (1624 - 1204)     | 626 (754 - 455)       | 11300 (13825 - 8105)     | 214 (300 - 142)      | 122.1 (140.6 - 100.7) | 81.5 (98.7 - 59.2)  | 1218.5 (1474.3 - 885.9)  | 18 (25.4 - 12)     |
| Niger       | 6484 (7548 - 5439)     | 2362 (3620 - 470)     | 47651 (74847 - 9761)     | 997 (1354 - 662)     | 89.7 (106.1 - 75.8)   | 58.6 (88.6 - 12.4)  | 860.8 (1313.4 - 182.6)   | 13.5 (18.2 - 8.8)  |
| Nigeria     | 67896 (83155 - 56410)  | 34934 (43287 - 23102) | 685637 (854508 - 447557) | 10237 (14740 - 6480) | 89.8 (110.7 - 72.6)   | 92.8 (112.2 - 64.5) | 1277.6 (1570.8 - 851)    | 13.2 (19.3 - 8.5)  |
| Nicaragua   | 1423 (1743 - 1096)     | 499 (813 - 384)       | 7083 (11344 - 5560)      | 202 (282 - 137)      | 42.8 (53.4 - 32.6)    | 16.5 (26.9 - 12.7)  | 216.3 (348.9 - 168.6)    | 6 (8.4 - 4.1)      |
| Netherlands | 95181 (109848 - 77615) | 6736 (8384 - 5366)    | 76557 (92325 - 63907)    | 13576 (18652 - 8982) | 352.3 (404.2 - 290.2) | 22.1 (27.3 - 17.7)  | 269.9 (324.8 - 225.6)    | 50.7 (69.8 - 33.5) |

|                  |                          |                       |                           |                       |                       |                     |                         |                    |
|------------------|--------------------------|-----------------------|---------------------------|-----------------------|-----------------------|---------------------|-------------------------|--------------------|
| Norway           | 35897 (42353 - 31094)    | 2377 (3061 - 1953)    | 25218 (30694 - 21243)     | 5152 (7199 - 3421)    | 483.4 (564.5 - 420.8) | 25.8 (33.2 - 21.4)  | 309.4 (376.2 - 258.7)   | 70 (96.7 - 46.8)   |
| Nepal            | 31697 (36645 - 27391)    | 8053 (10650 - 5140)   | 131493 (181364 - 83523)   | 4731 (6400 - 3220)    | 177.9 (206.7 - 153.3) | 68.7 (88.7 - 45.6)  | 915.9 (1217.4 - 581.3)  | 26.2 (35.6 - 17.8) |
| New Zealand      | 11364 (13415 - 9523)     | 1966 (2322 - 1545)    | 17761 (20467 - 14435)     | 1645 (2261 - 1118)    | 188.2 (219.6 - 158.8) | 27.8 (32.7 - 21.8)  | 271.2 (312.2 - 220.6)   | 27.4 (37.6 - 18.6) |
| Oman             | 925 (1074 - 798)         | 383 (486 - 264)       | 5880 (7535 - 4058)        | 143 (201 - 97)        | 56.3 (64.8 - 48.1)    | 40.2 (50.8 - 27.6)  | 511.7 (652.1 - 350.9)   | 8.4 (11.7 - 5.8)   |
| Pakistan         | 202294 (232536 - 174342) | 59235 (77652 - 41445) | 976946 (1311037 - 668937) | 30049 (42090 - 20472) | 199.5 (231.3 - 171)   | 83.2 (108 - 58.4)   | 1150.4 (1521.4 - 797.4) | 29.1 (41.1 - 19.9) |
| Panama           | 1300 (1628 - 1039)       | 678 (1188 - 443)      | 8593 (14845 - 5810)       | 196 (279 - 123)       | 43 (54.1 - 34.4)      | 23.4 (41 - 15.3)    | 287.3 (495.5 - 194)     | 6.4 (9.1 - 4.1)    |
| Peru             | 17618 (20700 - 15124)    | 5169 (7027 - 4215)    | 76154 (106415 - 60857)    | 2611 (3555 - 1775)    | 79 (93 - 68)          | 27.4 (37 - 22.4)    | 361.5 (501.5 - 290.5)   | 11.6 (15.7 - 7.9)  |
| Philippines      | 83829 (97331 - 68749)    | 30909 (37366 - 23829) | 571169 (702479 - 430653)  | 12333 (16887 - 8354)  | 178.1 (208.6 - 146.6) | 87.6 (104.4 - 68.1) | 1268.3 (1534.4 - 981.7) | 25.7 (35.4 - 17.5) |
| Papua New Guinea | 4123 (4871 - 3531)       | 488 (719 - 309)       | 11956 (18050 - 7531)      | 618 (851 - 412)       | 148.8 (174.4 - 128.4) | 21.6 (30.7 - 14.4)  | 388.1 (560.3 - 252.3)   | 21.7 (29.5 - 14.7) |
| Poland           | 62735 (75220 - 51617)    | 53520 (60372 - 46790) | 588111 (655569 - 518602)  | 9304 (12928 - 6207)   | 114.5 (137.1 - 94.2)  | 84.6 (95.1 - 74.2)  | 987.1 (1101.3 - 866)    | 17.1 (23.8 - 11.3) |

|              |                          |                          |                             |                       |                       |                       |                          |                     |
|--------------|--------------------------|--------------------------|-----------------------------|-----------------------|-----------------------|-----------------------|--------------------------|---------------------|
| North Korea  | 43156 (52286 - 36093)    | 12680 (16484 - 8108)     | 216769 (293219 - 139817)    | 6415 (9023 - 4254)    | 188.2 (227.9 - 156)   | 66.2 (84.4 - 42.3)    | 962.3 (1270.2 - 621.4)   | 27.7 (38.9 - 18.5)  |
| Portugal     | 105951 (123861 - 91143)  | 11622 (15539 - 9472)     | 125632 (163136 - 104012)    | 14964 (20236 - 10135) | 562.6 (652.9 - 489.5) | 51.1 (68.1 - 41.6)    | 602.7 (780 - 497)        | 80.5 (109.3 - 54.3) |
| Paraguay     | 8585 (9897 - 7296)       | 2186 (3044 - 1703)       | 32385 (47723 - 24894)       | 1276 (1747 - 861)     | 197.2 (228.6 - 166.6) | 60.6 (83.6 - 47.5)    | 816.4 (1173.1 - 632.3)   | 29 (39.6 - 19.7)    |
| Palestine    | 1333 (1556 - 1165)       | 352 (453 - 233)          | 6352 (8203 - 4384)          | 206 (281 - 138)       | 70.8 (84.1 - 61.7)    | 32.6 (42 - 21.4)      | 438.1 (560.6 - 296.2)    | 10.6 (14.5 - 7.1)   |
| Qatar        | 629 (784 - 491)          | 47 (58 - 38)             | 1090 (1359 - 876)           | 101 (146 - 63)        | 58.1 (69.2 - 49.3)    | 23.5 (29.2 - 18.9)    | 242.5 (296.6 - 201.1)    | 8.8 (12.3 - 6)      |
| Romania      | 39483 (47758 - 33097)    | 42026 (46954 - 33300)    | 469372 (526511 - 373984)    | 5868 (8183 - 3885)    | 130.4 (156.5 - 109)   | 122.7 (137.3 - 97.4)  | 1401.6 (1575.2 - 1112.1) | 19.5 (27.2 - 13)    |
| Russia       | 257094 (325765 - 208737) | 302820 (373858 - 273928) | 3989843 (4911632 - 3588378) | 38921 (56257 - 25222) | 132.4 (166 - 108)     | 146.4 (180.5 - 132.9) | 1971.2 (2411.9 - 1776.4) | 20.1 (28.8 - 13.2)  |
| Rwanda       | 2909 (3559 - 2408)       | 1670 (2391 - 629)        | 27003 (39156 - 9579)        | 451 (633 - 296)       | 58.9 (70.8 - 48.7)    | 62.6 (89.6 - 25.1)    | 842.9 (1204.7 - 311)     | 8.9 (12.3 - 5.9)    |
| Saudi Arabia | 5245 (6334 - 4343)       | 5960 (6997 - 5057)       | 85620 (104592 - 70924)      | 838 (1205 - 544)      | 31.2 (37.5 - 25.7)    | 64.6 (75.7 - 54.9)    | 774.7 (939.7 - 646.3)    | 4.8 (6.9 - 3.3)     |
| Sudan        | 9951 (11468 - 8181)      | 9076 (11545 - 6005)      | 163351 (219081 - 103077)    | 1534 (2158 - 1003)    | 56.1 (64.8 - 45.5)    | 82.2 (102.6 - 54.4)   | 1143.2 (1474.7 - 752.3)  | 8.4 (11.8 - 5.5)    |

|                       |                       |                       |                          |                    |                       |                      |                         |                    |
|-----------------------|-----------------------|-----------------------|--------------------------|--------------------|-----------------------|----------------------|-------------------------|--------------------|
| Senegal               | 5335 (6333 - 4524)    | 4262 (5340 - 2533)    | 77695 (98731 - 45898)    | 813 (1138 - 540)   | 88.5 (107.4 - 74.8)   | 112.6 (139.8 - 67.2) | 1660.7 (2089.3 - 985.8) | 13.2 (18.4 - 8.9)  |
| Singapore             | 22470 (26238 - 18857) | 1488 (1984 - 1227)    | 17504 (22214 - 14831)    | 3270 (4514 - 2184) | 484.4 (563 - 406.3)   | 30.9 (41 - 25.5)     | 378.6 (479.6 - 319.9)   | 70.5 (97.1 - 46.7) |
| Solomon Islands       | 342 (394 - 295)       | 130 (196 - 63)        | 2765 (4458 - 1258)       | 51 (68 - 35)       | 158.5 (183.8 - 134.5) | 70.1 (101.7 - 35.6)  | 1169 (1776.6 - 568.3)   | 23.3 (31.2 - 16)   |
| Sierra Leone          | 2354 (2756 - 1933)    | 1546 (2135 - 733)     | 34194 (47755 - 15491)    | 361 (503 - 239)    | 89.6 (106.7 - 73.8)   | 110.3 (146.6 - 57.1) | 1706.1 (2327.2 - 842.4) | 13.3 (18.7 - 8.8)  |
| El Salvador           | 1937 (2422 - 1563)    | 718 (1077 - 545)      | 10728 (15984 - 8326)     | 285 (410 - 187)    | 42.3 (53.1 - 33.9)    | 15.1 (22.6 - 11.5)   | 223.9 (333.2 - 173.5)   | 6.2 (9 - 4.1)      |
| Somalia               | 2632 (3146 - 2224)    | 1776 (2834 - 772)     | 31868 (52013 - 13461)    | 415 (591 - 275)    | 58.9 (71.1 - 49.2)    | 66.3 (103.1 - 29.7)  | 970.3 (1550.6 - 421.9)  | 9 (12.8 - 6)       |
| Serbia                | 16878 (19507 - 14507) | 13190 (14527 - 11332) | 155365 (171970 - 134004) | 2539 (3451 - 1726) | 129.2 (148.7 - 111.7) | 94.5 (104.2 - 81.2)  | 1120.8 (1238.8 - 962.3) | 19.5 (26.6 - 13.3) |
| South Sudan           | 3174 (3766 - 2616)    | 2741 (3551 - 1836)    | 48862 (64243 - 31399)    | 489 (687 - 322)    | 57.7 (68 - 47.4)      | 79.9 (102.9 - 54.1)  | 1165.6 (1511.7 - 774.4) | 8.7 (12 - 5.9)     |
| Sao Tome and Principe | 80 (93 - 65)          | 43 (58 - 29)          | 892 (1198 - 588)         | 12 (17 - 8)        | 90.9 (107.3 - 72.5)   | 62.8 (83.3 - 40.1)   | 1036.3 (1381.5 - 673)   | 13.6 (18.6 - 9.2)  |
| Suriname              | 1076 (1273 - 903)     | 348 (423 - 279)       | 5885 (7246 - 4631)       | 156 (218 - 105)    | 273.3 (326.8 - 228.8) | 98 (118.2 - 78.8)    | 1487.9 (1819 - 1178.1)  | 39.1 (54.4 - 26.4) |

|            |                          |                       |                          |                       |                       |                     |                         |                    |
|------------|--------------------------|-----------------------|--------------------------|-----------------------|-----------------------|---------------------|-------------------------|--------------------|
| Slovakia   | 9267 (10840 - 7828)      | 5761 (6824 - 5095)    | 71069 (83249 - 63031)    | 1382 (1892 - 937)     | 128.4 (149.4 - 109.3) | 79.3 (93.8 - 70.1)  | 982.1 (1151.9 - 872)    | 19.2 (26.4 - 13)   |
| Slovenia   | 4098 (4996 - 3421)       | 1988 (2311 - 1654)    | 19126 (21935 - 16159)    | 599 (827 - 401)       | 127.7 (154.5 - 106.6) | 49 (56.9 - 40.8)    | 505.7 (581.1 - 428.3)   | 18.9 (26.1 - 12.6) |
| Sweden     | 78401 (90518 - 66009)    | 6101 (7272 - 4865)    | 61844 (72360 - 51853)    | 11104 (15293 - 7315)  | 478.4 (546.7 - 407.3) | 29 (34.5 - 23.2)    | 332.8 (389.9 - 279.3)   | 68.6 (94.5 - 45.8) |
| Swaziland  | 711 (834 - 577)          | 323 (412 - 247)       | 6170 (8027 - 4618)       | 106 (147 - 69)        | 122.9 (145.5 - 98.6)  | 81.5 (102.3 - 62.8) | 1251.6 (1594.2 - 959.5) | 17.9 (25 - 11.8)   |
| Seychelles | 141 (162 - 124)          | 50 (65 - 30)          | 756 (995 - 483)          | 21 (28 - 14)          | 178.2 (206.3 - 155.1) | 63.5 (83.7 - 38.9)  | 931.1 (1220.1 - 594.8)  | 25.8 (35.4 - 17.8) |
| Syria      | 6881 (7834 - 5894)       | 3736 (5107 - 2133)    | 67155 (91754 - 38584)    | 1059 (1421 - 706)     | 56.1 (63.7 - 48.2)    | 44.8 (61.8 - 25.3)  | 633 (867.3 - 367.1)     | 8.4 (11.3 - 5.7)   |
| Chad       | 4160 (4805 - 3574)       | 1891 (2729 - 679)     | 36466 (53663 - 12897)    | 628 (857 - 419)       | 87.3 (102.7 - 75.2)   | 65.1 (93.4 - 24.1)  | 966.2 (1410.2 - 351.7)  | 12.8 (17.8 - 8.6)  |
| Togo       | 2623 (3034 - 2178)       | 1434 (1870 - 751)     | 28162 (37650 - 13973)    | 403 (552 - 269)       | 88.6 (103.3 - 74.2)   | 90.2 (114.7 - 49.3) | 1290.3 (1680.6 - 680)   | 13.3 (18.2 - 8.9)  |
| Thailand   | 124561 (145531 - 105642) | 21053 (27159 - 14734) | 291356 (360000 - 215920) | 18509 (25592 - 12664) | 176.9 (207.2 - 149.7) | 33.1 (43 - 23.2)    | 424.7 (527.3 - 314.9)   | 26.1 (36 - 17.8)   |
| Tajikistan | 2199 (2584 - 1841)       | 2442 (3013 - 1573)    | 36854 (48039 - 23516)    | 339 (471 - 228)       | 54.5 (64.3 - 45.3)    | 88.2 (107.9 - 56.9) | 1167.2 (1468.3 - 748)   | 8.2 (11.3 - 5.6)   |



|                     |                          |                       |                            |                       |                       |                      |                          |                    |
|---------------------|--------------------------|-----------------------|----------------------------|-----------------------|-----------------------|----------------------|--------------------------|--------------------|
| Turkmenistan        | 1422 (1742 - 1148)       | 199 (277 - 143)       | 4624 (6437 - 3382)         | 222 (314 - 145)       | 44.1 (54.9 - 35.2)    | 7.6 (10.5 - 5.5)     | 142.4 (196.6 - 104.2)    | 6.8 (9.6 - 4.4)    |
| Timor-Leste         | 758 (879 - 628)          | 254 (353 - 169)       | 4627 (6749 - 2995)         | 113 (157 - 75)        | 184.5 (217.8 - 153.5) | 86.5 (116.1 - 58.8)  | 1173.6 (1641.6 - 782.6)  | 26.9 (37.6 - 18)   |
| Tonga               | 101 (118 - 84)           | 29 (40 - 21)          | 422 (615 - 304)            | 15 (21 - 10)          | 156.7 (182.8 - 130.5) | 45.1 (61.9 - 33)     | 639.7 (919 - 461.5)      | 23.1 (32 - 15.7)   |
| Trinidad and Tobago | 3508 (4066 - 2966)       | 845 (1040 - 719)      | 13944 (17123 - 11631)      | 509 (708 - 341)       | 275.1 (321.5 - 229.6) | 73.7 (91.5 - 63.1)   | 1092.7 (1338.6 - 920.2)  | 39.6 (55 - 26.4)   |
| Tunisia             | 5466 (6441 - 4668)       | 4235 (5430 - 2803)    | 54391 (72354 - 35319)      | 842 (1191 - 568)      | 56.5 (66 - 48.8)      | 55.8 (71.9 - 36.8)   | 651.5 (857.4 - 428.1)    | 8.6 (12.2 - 5.8)   |
| Turkey              | 34865 (40535 - 29799)    | 25317 (29575 - 21025) | 306524 (359412 - 249082)   | 5373 (7389 - 3587)    | 54.4 (63 - 46.3)      | 49.5 (58 - 41.2)     | 549.6 (642.4 - 452)      | 8.3 (11.5 - 5.6)   |
| Taiwan              | 78222 (95508 - 62123)    | 6816 (8124 - 5852)    | 88754 (103986 - 78095)     | 11483 (16093 - 7506)  | 268.1 (328.8 - 212)   | 22.6 (27 - 19.6)     | 303.8 (356.2 - 267.7)    | 39.3 (55.2 - 25.7) |
| Tanzania            | 15156 (19010 - 11922)    | 5014 (7038 - 2399)    | 80819 (113085 - 39023)     | 2351 (3372 - 1528)    | 68.6 (86.8 - 52.7)    | 37.6 (52.8 - 18.2)   | 497.5 (697 - 241.3)      | 10.4 (15 - 6.8)    |
| Uganda              | 8286 (10017 - 6832)      | 4543 (6467 - 1750)    | 73308 (105974 - 28609)     | 1294 (1847 - 845)     | 58.8 (71.1 - 49.2)    | 55.9 (78.7 - 21.9)   | 753.6 (1077.5 - 296)     | 8.9 (12.7 - 5.8)   |
| Ukraine             | 167970 (187774 - 149362) | 82653 (96167 - 73719) | 1090677 (1266969 - 968705) | 25305 (34184 - 17532) | 251.3 (279.4 - 224.3) | 105.9 (123.7 - 94.1) | 1452.4 (1688.9 - 1290.2) | 38.1 (51.5 - 26.4) |

|                                  |                             |                        |                             |                          |                          |                      |                          |                     |
|----------------------------------|-----------------------------|------------------------|-----------------------------|--------------------------|--------------------------|----------------------|--------------------------|---------------------|
| Uruguay                          | 6855 (8084 - 5798)          | 2631 (3495 - 2197)     | 28715 (37392 - 24087)       | 1011 (1362 - 688)        | 159.5 (188.5 - 135.8)    | 48.6 (64.2 - 40.5)   | 594.9 (775.8 - 496.7)    | 23.7 (32 - 16.1)    |
| United States                    | 5076516 (5397966 - 4784278) | 86814 (110541 - 70233) | 1541620 (1854471 - 1272995) | 720000 (965127 - 511421) | 1183.6 (1259.4 - 1117.4) | 17.5 (22 - 14.2)     | 348.5 (421.9 - 287)      | 169 (226.9 - 119.8) |
| Uzbekistan                       | 9735 (11705 - 7843)         | 14971 (17907 - 12471)  | 250690 (308290 - 204664)    | 1507 (2155 - 1008)       | 54.1 (64.7 - 43)         | 107.4 (126.8 - 89.3) | 1580.5 (1916.4 - 1297.2) | 8.3 (11.8 - 5.6)    |
| Saint Vincent and the Grenadines | 221 (255 - 190)             | 60 (70 - 48)           | 915 (1086 - 744)            | 32 (44 - 21)             | 259.2 (298.9 - 221.6)    | 75.5 (89.4 - 61)     | 1082.2 (1282 - 877.9)    | 37.2 (50.7 - 25)    |
| Venezuela                        | 9602 (11535 - 7441)         | 3874 (6196 - 2776)     | 56522 (91203 - 41900)       | 1451 (2078 - 945)        | 44.8 (54.5 - 34)         | 22 (35.1 - 15.6)     | 277.8 (443.7 - 204.1)    | 6.7 (9.6 - 4.3)     |
| Vietnam                          | 121349 (142065 - 102596)    | 88075 (105439 - 62710) | 1022625 (1293542 - 722434)  | 17463 (24329 - 12041)    | 171.5 (200.8 - 143.9)    | 120.8 (145.4 - 85.5) | 1454.4 (1844.4 - 1021.7) | 24.6 (34.3 - 16.9)  |
| Vanuatu                          | 183 (212 - 160)             | 69 (100 - 40)          | 1422 (2187 - 759)           | 28 (38 - 19)             | 160.1 (186.6 - 138.9)    | 71.6 (102.4 - 43.5)  | 1159.8 (1693.7 - 662.4)  | 23.7 (32.5 - 16.1)  |
| Samoa                            | 165 (191 - 143)             | 51 (79 - 34)           | 850 (1414 - 522)            | 25 (34 - 16)             | 151.9 (176.9 - 131.4)    | 51.8 (76.9 - 34.1)   | 773.5 (1247.9 - 487.3)   | 22.5 (31 - 14.9)    |
| Anhui                            | 39670 (52095 - 30055)       | 35018 (42903 - 21653)  | 467818 (577332 - 305879)    | 5948 (8952 - 3769)       | 61 (80.2 - 46)           | 60.2 (73.8 - 36.9)   | 748 (922 - 480.1)        | 9.1 (13.6 - 5.7)    |
| Sonora                           | 955 (1182 - 780)            | 269 (349 - 224)        | 4194 (5432 - 3506)          | 143 (201 - 93)           | 45.5 (56.4 - 36.9)       | 14.4 (18.8 - 11.9)   | 202.3 (262.9 - 169.1)    | 6.7 (9.4 - 4.4)     |

|              |                          |                       |                           |                       |                       |                    |                          |                    |
|--------------|--------------------------|-----------------------|---------------------------|-----------------------|-----------------------|--------------------|--------------------------|--------------------|
| Beijing      | 48822 (57199 - 41819)    | 13832 (16206 - 11631) | 184377 (221412 - 151555)  | 7207 (9750 - 4825)    | 235.7 (276.5 - 200.7) | 77 (90.1 - 64.8)   | 921.4 (1092.5 - 767.7)   | 34.5 (46.4 - 23.3) |
| Tabasco      | 661 (793 - 536)          | 235 (326 - 196)       | 3733 (5105 - 3146)        | 100 (143 - 65)        | 44.8 (53.6 - 36.6)    | 18.6 (25.7 - 15.5) | 257.3 (353.2 - 217.3)    | 6.6 (9.5 - 4.4)    |
| Guangdong    | 162063 (193145 - 132279) | 41269 (49262 - 30297) | 539669 (661771 - 409662)  | 23774 (33669 - 16014) | 196.1 (236.5 - 158.5) | 54.6 (65.1 - 40)   | 676.2 (822.3 - 510.6)    | 28.5 (40.7 - 19.1) |
| Guangxi      | 51275 (63802 - 40031)    | 29008 (34897 - 20578) | 423381 (515770 - 304682)  | 7616 (10802 - 4901)   | 113.4 (140.5 - 88.8)  | 68.8 (82.9 - 48.7) | 946.3 (1153 - 681.3)     | 16.8 (23.8 - 10.8) |
| Chongqing    | 70049 (89161 - 55792)    | 11866 (15083 - 7918)  | 172500 (220824 - 116740)  | 10333 (15050 - 6711)  | 197.1 (248.5 - 158.5) | 37.9 (48 - 25.2)   | 501.3 (637.6 - 341)      | 29 (42.2 - 19)     |
| Guizhou      | 55881 (67922 - 46053)    | 15608 (20253 - 8740)  | 266853 (348057 - 161312)  | 8290 (11677 - 5646)   | 174.4 (213.1 - 143.1) | 55 (71.1 - 30.1)   | 824.6 (1072.3 - 492.7)   | 25.7 (36.1 - 17.6) |
| Hebei        | 135079 (161834 - 107821) | 55517 (66329 - 44600) | 871531 (1066040 - 676160) | 19979 (27614 - 13456) | 191.6 (227.9 - 153.3) | 94.7 (113 - 77)    | 1279.8 (1551.3 - 1009.7) | 28.1 (38.9 - 18.9) |
| Heilongjiang | 122964 (141555 - 103229) | 31149 (38236 - 23969) | 529349 (664122 - 393342)  | 18348 (25013 - 12345) | 306.4 (350.4 - 258.2) | 95.7 (116 - 74.6)  | 1347.3 (1663.1 - 1032.4) | 45.2 (61.5 - 30.5) |
| Henan        | 182394 (219726 - 152171) | 64199 (76995 - 53262) | 960696 (1160228 - 784052) | 27140 (37837 - 17786) | 208.6 (252.8 - 174)   | 85.4 (103 - 71.2)  | 1135.7 (1364.1 - 944.4)  | 30.8 (43.5 - 20.3) |
| Hubei        | 108349 (144801 - 79830)  | 24020 (29452 - 15905) | 368532 (453642 - 254502)  | 15987 (23771 - 10025) | 181.7 (243.4 - 136)   | 48.7 (59.6 - 32)   | 644.4 (790.4 - 442.2)    | 26.6 (39.5 - 17)   |

|          |                          |                        |                            |                       |                       |                     |                          |                    |
|----------|--------------------------|------------------------|----------------------------|-----------------------|-----------------------|---------------------|--------------------------|--------------------|
| Hunan    | 185411 (219333 - 145379) | 31370 (39826 - 17494)  | 467565 (589218 - 281228)   | 27551 (38511 - 18254) | 261.8 (310.3 - 205.7) | 49.4 (62.6 - 27.2)  | 672.6 (845.9 - 399.1)    | 38.7 (54.1 - 25.8) |
| Jiangxi  | 36003 (44471 - 26647)    | 14357 (18813 - 11196)  | 205023 (269582 - 158611)   | 5362 (7630 - 3303)    | 92.7 (114.4 - 69.1)   | 43.4 (56 - 33.4)    | 549 (717.6 - 428.6)      | 13.7 (19.4 - 8.5)  |
| Jilin    | 69908 (86936 - 53727)    | 22204 (26839 - 16898)  | 361839 (441651 - 271493)   | 10396 (14765 - 6783)  | 246.4 (305 - 188.2)   | 96.2 (116 - 74.6)   | 1317.4 (1602.1 - 1003.1) | 36.2 (51.7 - 23.7) |
| Shaanxi  | 76883 (92495 - 63014)    | 17186 (22025 - 10421)  | 279115 (362368 - 178436)   | 11519 (16319 - 7717)  | 211.9 (257.3 - 172.4) | 60 (76.3 - 35.7)    | 800.3 (1027.4 - 507.7)   | 31.4 (44.3 - 21)   |
| Shandong | 150616 (192995 - 112293) | 77253 (100646 - 65253) | 1056567 (1349743 - 867586) | 22391 (33109 - 14140) | 140.6 (181.2 - 104.2) | 81.1 (105.5 - 68.5) | 1025.8 (1308.4 - 851.1)  | 20.8 (30.8 - 13)   |
| Shanghai | 37476 (44517 - 30002)    | 16356 (19661 - 11057)  | 161116 (196916 - 112770)   | 5482 (7674 - 3586)    | 131.9 (157.4 - 106.1) | 58.2 (70 - 39.2)    | 580 (709.8 - 404.7)      | 19.2 (26.9 - 12.5) |
| Shanxi   | 82303 (101528 - 64174)   | 20251 (25272 - 15652)  | 309458 (395277 - 235743)   | 12155 (17202 - 7790)  | 254.3 (316.1 - 199.2) | 77.5 (95.2 - 60.5)  | 1009.2 (1273.8 - 781)    | 37.2 (52.2 - 23.9) |
| Sichuan  | 105655 (125199 - 86598)  | 25765 (33996 - 18496)  | 369806 (496713 - 273469)   | 15685 (21963 - 10376) | 112.8 (133.1 - 91.6)  | 31.3 (41.1 - 22.4)  | 409.1 (546.1 - 301.7)    | 16.6 (23.3 - 11.1) |
| Tlaxcala | 362 (438 - 284)          | 113 (151 - 94)         | 1569 (2062 - 1328)         | 55 (78 - 35)          | 42.5 (51.7 - 32.8)    | 14.2 (19.1 - 11.8)  | 185.8 (244.2 - 157.5)    | 6.4 (9 - 4)        |
| Fujian   | 31883 (38875 - 26207)    | 16837 (20235 - 12284)  | 217950 (263897 - 159357)   | 4722 (6742 - 3112)    | 95.1 (116.5 - 78.6)   | 55.6 (66.8 - 40.2)  | 681.4 (827.7 - 498.3)    | 14 (20.1 - 9.2)    |

|                                 |                       |                    |                         |                      |                       |                    |                       |                     |
|---------------------------------|-----------------------|--------------------|-------------------------|----------------------|-----------------------|--------------------|-----------------------|---------------------|
| Veracruz de Ignacio de la Llave | 2780 (3492 - 2091)    | 1238 (1619 - 1031) | 18178 (23649 - 15093)   | 418 (608 - 268)      | 42.8 (54.4 - 32)      | 20.5 (26.8 - 17.1) | 283.6 (370.9 - 235.9) | 6.4 (9.4 - 4.1)     |
| Gansu                           | 43996 (55902 - 33809) | 6208 (7895 - 4136) | 109774 (138225 - 75813) | 6587 (9432 - 4225)   | 187.2 (236.4 - 142.6) | 34.2 (43.2 - 22.4) | 482.1 (605.6 - 332.4) | 27.7 (39.5 - 18)    |
| North East England              | 26570 (30334 - 23261) | 1516 (1944 - 1276) | 17382 (21055 - 14740)   | 3732 (4966 - 2598)   | 597.5 (679.3 - 526.3) | 28.1 (35.7 - 23.7) | 360.8 (433.9 - 305.5) | 85 (113.8 - 58.9)   |
| North West England              | 69386 (78259 - 60269) | 4030 (5214 - 3329) | 45490 (56134 - 38583)   | 9821 (13344 - 6783)  | 599.5 (673.7 - 523.2) | 28.6 (36.6 - 23.7) | 362 (444 - 306.5)     | 85.9 (115.9 - 58.9) |
| Yorkshire and the Humber        | 49407 (58090 - 42514) | 2966 (3872 - 2454) | 32534 (40292 - 27106)   | 6926 (9628 - 4762)   | 572.3 (673.6 - 496.4) | 28 (36.2 - 23.2)   | 344.7 (423.8 - 285.8) | 81.2 (113.4 - 55.8) |
| East Midlands                   | 44291 (50637 - 37333) | 2426 (3197 - 1992) | 26650 (32619 - 22245)   | 6247 (8347 - 4198)   | 577.5 (662.2 - 490.1) | 25.6 (33.6 - 21.1) | 318.1 (384.7 - 264.1) | 82.4 (111.1 - 54.7) |
| West Midlands                   | 52890 (59690 - 46312) | 3286 (4114 - 2755) | 35253 (42732 - 29789)   | 7452 (9983 - 5154)   | 571.9 (644.2 - 504.1) | 28.3 (35.5 - 23.7) | 345.7 (420.1 - 289.2) | 81.7 (110.2 - 56.2) |
| East of England                 | 61660 (69884 - 54964) | 3107 (3929 - 2638) | 33287 (40477 - 28337)   | 8687 (11879 - 6081)  | 606 (680.1 - 543.3)   | 23.6 (29.7 - 20.1) | 293.5 (353.5 - 249.2) | 86.6 (118 - 60.6)   |
| Greater London                  | 49588 (57237 - 42333) | 2471 (3085 - 1924) | 28215 (34049 - 23048)   | 7018 (9456 - 4831)   | 517.1 (594.3 - 442.1) | 22 (27.4 - 17.2)   | 278.9 (337.3 - 225.4) | 73.7 (99.4 - 50.3)  |
| South East England              | 83344 (96816 - 71737) | 4640 (5993 - 3822) | 47877 (57882 - 40572)   | 11795 (15834 - 7965) | 565.2 (656.5 - 492.9) | 24 (31 - 19.8)     | 288.4 (347.3 - 243.4) | 81.2 (109.6 - 55.2) |

|                    |                         |                       |                          |                      |                       |                      |                          |                     |
|--------------------|-------------------------|-----------------------|--------------------------|----------------------|-----------------------|----------------------|--------------------------|---------------------|
| South West England | 59933 (72790 - 51441)   | 3535 (4491 - 2881)    | 35957 (42992 - 30149)    | 8397 (11420 - 5742)  | 594.2 (709.1 - 516.3) | 26.2 (33.3 - 21.5)   | 313.4 (372.4 - 262.9)    | 84.7 (114.3 - 58.5) |
| Wales              | 30792 (36446 - 26434)   | 1881 (2384 - 1583)    | 20743 (24831 - 17649)    | 4318 (6010 - 2898)   | 563.9 (661 - 485.7)   | 27.7 (35 - 23.4)     | 346.2 (414.5 - 291.7)    | 80.2 (110.8 - 54)   |
| Hainan             | 17014 (20607 - 13348)   | 5212 (6385 - 4179)    | 65349 (81491 - 52250)    | 2509 (3519 - 1628)   | 214.2 (261.2 - 166.1) | 68 (83 - 54.5)       | 830.7 (1036.8 - 669.5)   | 31.5 (44.6 - 20.3)  |
| Zacatecas          | 478 (597 - 386)         | 191 (259 - 158)       | 2718 (3649 - 2231)       | 72 (103 - 48)        | 40.7 (51.2 - 32.8)    | 16.1 (21.9 - 13.3)   | 229.4 (309 - 188.5)      | 6.1 (8.7 - 4.1)     |
| Tamaulipas         | 1151 (1382 - 966)       | 357 (459 - 291)       | 5442 (6938 - 4470)       | 174 (246 - 114)      | 42.8 (51.4 - 35.4)    | 15 (19.4 - 12.2)     | 205.5 (264 - 169.8)      | 6.4 (9 - 4.2)       |
| Jiangsu            | 72807 (88413 - 56262)   | 45108 (57262 - 20884) | 543705 (677368 - 289305) | 10738 (15354 - 6799) | 77.6 (94.7 - 60)      | 53.4 (68 - 24.3)     | 606.1 (759.1 - 315)      | 11.4 (16.3 - 7.2)   |
| Yucatán            | 656 (778 - 530)         | 239 (342 - 195)       | 3583 (5013 - 2957)       | 100 (140 - 64)       | 42.1 (49.9 - 34)      | 16.9 (24.3 - 13.8)   | 233.2 (329.4 - 193)      | 6.4 (8.9 - 4.1)     |
| Liaoning           | 103369 (133048 - 83653) | 46928 (54919 - 38852) | 693602 (822120 - 559526) | 15423 (21955 - 9907) | 195.2 (249 - 157.2)   | 102.3 (119.3 - 85.1) | 1353.3 (1584.4 - 1099.2) | 28.9 (41 - 18.7)    |
| Aguascalientes     | 335 (399 - 270)         | 91 (121 - 75)         | 1360 (1813 - 1148)       | 50 (71 - 34)         | 42.1 (50.2 - 33.8)    | 13 (17.3 - 10.6)     | 174.4 (233.2 - 146.8)    | 6.3 (8.8 - 4.2)     |
| Baja California    | 979 (1176 - 787)        | 299 (354 - 236)       | 4758 (5666 - 3871)       | 149 (212 - 96)       | 43 (53 - 34)          | 16.2 (19.2 - 12.7)   | 217.3 (257.3 - 175.5)    | 6.4 (9.2 - 4.2)     |

|                     |                       |                       |                          |                    |                       |                     |                         |                    |
|---------------------|-----------------------|-----------------------|--------------------------|--------------------|-----------------------|---------------------|-------------------------|--------------------|
| Baja California Sur | 173 (210 - 140)       | 41 (53 - 34)          | 681 (858 - 569)          | 26 (37 - 17)       | 43.4 (52.6 - 34.8)    | 12.7 (16.5 - 10.4)  | 176.4 (223.7 - 147.2)   | 6.5 (9.1 - 4.1)    |
| Campeche            | 255 (299 - 212)       | 81 (110 - 67)         | 1298 (1726 - 1085)       | 38 (54 - 25)       | 44.2 (53 - 36.3)      | 16.4 (22.4 - 13.6)  | 228.8 (306.7 - 191.3)   | 6.5 (9.2 - 4.3)    |
| Coahuila            | 889 (1062 - 730)      | 281 (369 - 234)       | 4450 (5718 - 3736)       | 134 (187 - 90)     | 42 (50.4 - 34.4)      | 15.1 (19.9 - 12.6)  | 213.9 (275.2 - 179.9)   | 6.3 (8.7 - 4.2)    |
| Colima              | 207 (252 - 162)       | 67 (92 - 52)          | 1051 (1429 - 799)        | 31 (44 - 20)       | 40.8 (50 - 31.6)      | 14.8 (20.3 - 11.5)  | 210 (286.8 - 160.3)     | 6.1 (8.6 - 3.9)    |
| Inner Mongolia      | 40423 (49916 - 32847) | 15283 (18461 - 12295) | 255198 (311997 - 200860) | 6043 (8572 - 3878) | 177.9 (218.4 - 147.1) | 84.2 (102.1 - 68.3) | 1148.2 (1391.1 - 915.8) | 26.2 (37.1 - 17.1) |
| Chiapas             | 1132 (1404 - 904)     | 367 (496 - 301)       | 6140 (8365 - 5159)       | 172 (245 - 109)    | 39.1 (49.3 - 30.9)    | 15 (20.2 - 12.2)    | 215.7 (293.9 - 179.5)   | 5.9 (8.3 - 3.6)    |
| Chihuahua           | 1208 (1457 - 964)     | 432 (552 - 358)       | 6889 (8896 - 5716)       | 182 (254 - 118)    | 41.5 (50.2 - 32.9)    | 16.5 (21 - 13.6)    | 239.5 (308.6 - 199.3)   | 6.2 (8.7 - 4)      |
| Distrito Federal    | 3670 (4471 - 2984)    | 1021 (1409 - 825)     | 14532 (19254 - 11984)    | 553 (796 - 354)    | 43.1 (52.4 - 35)      | 12.6 (17.4 - 10.2)  | 172.3 (230.2 - 141.9)   | 6.5 (9.3 - 4.1)    |
| Durango             | 497 (592 - 409)       | 152 (210 - 126)       | 2242 (2988 - 1886)       | 75 (106 - 50)      | 39.4 (47.1 - 32.3)    | 12.8 (17.8 - 10.6)  | 178.9 (238 - 150.4)     | 5.9 (8.3 - 4)      |
| Guanajuato          | 1618 (1944 - 1308)    | 559 (773 - 467)       | 8194 (11258 - 6813)      | 245 (347 - 157)    | 42.6 (51.1 - 34.4)    | 15.7 (21.7 - 13.1)  | 216.3 (298.5 - 179.8)   | 6.4 (9 - 4.1)      |

|                     |                    |                    |                       |                  |                    |                    |                       |                 |
|---------------------|--------------------|--------------------|-----------------------|------------------|--------------------|--------------------|-----------------------|-----------------|
| Guerrero            | 1059 (1340 - 878)  | 511 (680 - 425)    | 7613 (10076 - 6413)   | 159 (227 - 103)  | 42 (53.4 - 34.5)   | 20.9 (27.9 - 17.4) | 301.9 (399.6 - 254.7) | 6.3 (9 - 4.1)   |
| Hidalgo             | 826 (1007 - 674)   | 276 (390 - 226)    | 4056 (5569 - 3397)    | 124 (173 - 82)   | 41.2 (50.3 - 33.7) | 14.8 (20.9 - 12)   | 204 (281.8 - 171.1)   | 6.1 (8.6 - 4.1) |
| Jalisco             | 2454 (2987 - 1952) | 751 (1040 - 614)   | 10907 (14969 - 8991)  | 371 (529 - 245)  | 42.9 (52.6 - 33.8) | 13.9 (19.3 - 11.4) | 191.7 (264.5 - 157.9) | 6.4 (9.2 - 4.3) |
| México              | 4934 (6052 - 3945) | 1237 (1693 - 1025) | 19377 (26266 - 16105) | 756 (1072 - 494) | 43.3 (53.6 - 34.6) | 13.1 (17.8 - 10.8) | 176 (240.6 - 146.5)   | 6.5 (9.2 - 4.2) |
| Michoacán de Ocampo | 1466 (1787 - 1156) | 617 (813 - 515)    | 8425 (11098 - 7092)   | 220 (305 - 140)  | 42.6 (52.1 - 33.3) | 17.9 (23.6 - 15)   | 242.6 (319.9 - 204.2) | 6.4 (8.9 - 4)   |
| Morelos             | 643 (796 - 516)    | 217 (279 - 175)    | 3124 (4022 - 2538)    | 97 (139 - 60)    | 42.2 (52 - 33.5)   | 15.2 (19.6 - 12.2) | 207.7 (267.7 - 168.7) | 6.3 (9.1 - 4)   |
| Nayarit             | 363 (451 - 293)    | 108 (147 - 89)     | 1545 (2014 - 1286)    | 54 (77 - 36)     | 41.6 (51.9 - 33.3) | 12.9 (17.7 - 10.6) | 177.9 (232.2 - 148)   | 6.2 (8.8 - 4.2) |
| Nuevo León          | 1503 (1830 - 1217) | 406 (552 - 330)    | 6363 (8416 - 5221)    | 228 (327 - 149)  | 40.2 (49.4 - 32.3) | 12.6 (17.3 - 10.2) | 174.9 (231 - 144.2)   | 6 (8.7 - 3.9)   |
| Oaxaca              | 1318 (1619 - 1075) | 586 (746 - 477)    | 7911 (10048 - 6693)   | 197 (282 - 130)  | 42.3 (52.2 - 34.3) | 18.7 (23.8 - 15.3) | 251.7 (318.7 - 213.7) | 6.3 (9.1 - 4.2) |
| Puebla              | 1810 (2194 - 1438) | 696 (939 - 583)    | 9993 (13559 - 8549)   | 274 (394 - 176)  | 40.7 (49.8 - 32.3) | 16.3 (22 - 13.7)   | 224.1 (305.6 - 191.7) | 6.1 (8.8 - 3.9) |



|                  |                       |                    |                         |                    |                       |                    |                        |                    |
|------------------|-----------------------|--------------------|-------------------------|--------------------|-----------------------|--------------------|------------------------|--------------------|
| Querétaro        | 475 (583 - 384)       | 143 (193 - 118)    | 2184 (2944 - 1845)      | 72 (103 - 45)      | 39.8 (49.3 - 31.7)    | 14 (18.9 - 11.5)   | 188.9 (254.4 - 158.6)  | 6 (8.4 - 3.7)      |
| Quintana Roo     | 305 (374 - 243)       | 73 (97 - 60)       | 1367 (1809 - 1140)      | 47 (67 - 31)       | 43.5 (53.8 - 34.1)    | 15.1 (19.8 - 12.3) | 207.7 (274 - 173.8)    | 6.5 (9.3 - 4.3)    |
| San Luis Potosí  | 828 (1035 - 677)      | 271 (361 - 227)    | 3732 (5009 - 3124)      | 124 (171 - 82)     | 41.1 (51.4 - 33.3)    | 13.9 (18.6 - 11.6) | 185.4 (249.6 - 155.1)  | 6.1 (8.5 - 4)      |
| Sinaloa          | 987 (1204 - 799)      | 293 (385 - 244)    | 4243 (5461 - 3560)      | 148 (214 - 93)     | 42.6 (52.4 - 34.5)    | 14 (18.5 - 11.6)   | 187 (242.2 - 157.2)    | 6.3 (9.1 - 3.9)    |
| Ningxia          | 10630 (12768 - 8464)  | 2071 (2590 - 1597) | 35317 (45450 - 26396)   | 1594 (2205 - 1035) | 221.3 (265.6 - 177.9) | 56.7 (69.8 - 44.3) | 769.5 (968.7 - 592)    | 32.7 (45.5 - 21.5) |
| Northern Ireland | 15144 (17938 - 12921) | 937 (1188 - 796)   | 10762 (13221 - 9218)    | 2136 (2912 - 1434) | 577 (680.3 - 490.8)   | 30.5 (38.7 - 26)   | 383.1 (468.6 - 327.4)  | 82.1 (111.8 - 55)  |
| Qinghai          | 7554 (9330 - 5746)    | 881 (1210 - 665)   | 16374 (22851 - 11922)   | 1141 (1624 - 707)  | 183 (227.3 - 139.3)   | 27.1 (37 - 21.1)   | 404.9 (555.7 - 308)    | 27.2 (38.8 - 17.1) |
| Scotland         | 51447 (59164 - 44550) | 3474 (4455 - 2879) | 39013 (48237 - 33211)   | 7229 (9850 - 4920) | 584.4 (667.3 - 507.5) | 33.2 (42.5 - 27.7) | 409.5 (505.3 - 349.5)  | 83 (113.4 - 56.7)  |
| Tianjin          | 38224 (47155 - 29276) | 7473 (9254 - 5440) | 106706 (134107 - 77232) | 5709 (8216 - 3629) | 279 (341.8 - 214.3)   | 65.1 (80.3 - 47.6) | 815.2 (1013.9 - 593.3) | 41.2 (58.5 - 26.6) |
| Tibet            | 1940 (2325 - 1535)    | 340 (441 - 254)    | 5840 (7587 - 4210)      | 289 (404 - 186)    | 113 (136.8 - 88.4)    | 24.1 (31 - 18.2)   | 345 (446.3 - 256.3)    | 16.5 (23.2 - 10.6) |

|              |                         |                       |                          |                       |                       |                      |                         |                    |
|--------------|-------------------------|-----------------------|--------------------------|-----------------------|-----------------------|----------------------|-------------------------|--------------------|
| Xinjiang     | 37224 (45753 - 28903)   | 5802 (7383 - 4118)    | 103100 (130610 - 74365)  | 5577 (8002 - 3591)    | 228.1 (278.3 - 184.9) | 45.9 (58.7 - 32.2)   | 655.9 (830.3 - 471.6)   | 33.7 (48 - 22.1)   |
| Yunnan       | 99149 (117474 - 79867)  | 15703 (18825 - 11216) | 252669 (308737 - 182398) | 14829 (20897 - 9529)  | 254.8 (302.9 - 209.1) | 46.2 (55.4 - 33.2)   | 659.1 (799.6 - 478.9)   | 37.8 (53.2 - 24.4) |
| Zhejiang     | 117023 (140708 - 99124) | 18865 (23670 - 10844) | 218631 (269499 - 135535) | 17175 (24614 - 11287) | 198.7 (240.4 - 167.5) | 35 (44.2 - 19.9)     | 387.9 (479.3 - 239)     | 29 (41.6 - 19.1)   |
| Yemen        | 5851 (6687 - 5079)      | 6589 (9750 - 3909)    | 130368 (209028 - 69703)  | 910 (1246 - 613)      | 55.6 (64 - 48)        | 104.6 (143.8 - 65.8) | 1548.4 (2336.2 - 897.5) | 8.4 (11.6 - 5.7)   |
| South Africa | 48157 (56622 - 41715)   | 17596 (20932 - 13779) | 251816 (300609 - 199715) | 7126 (9705 - 4750)    | 127.7 (152 - 109.8)   | 56.5 (67.3 - 44.1)   | 767.2 (915.2 - 609.2)   | 18.7 (25.6 - 12.3) |
| Zambia       | 3204 (3911 - 2628)      | 3210 (3972 - 2183)    | 51141 (63378 - 33403)    | 503 (709 - 330)       | 55.3 (69.5 - 44.8)    | 97 (121.6 - 64.9)    | 1309.3 (1613.8 - 871.1) | 8.4 (11.9 - 5.6)   |
| Zimbabwe     | 7874 (9351 - 6517)      | 3358 (4476 - 2445)    | 53705 (72628 - 39269)    | 1152 (1592 - 774)     | 123.8 (147.6 - 100.7) | 64.7 (85.7 - 47.2)   | 899.8 (1210 - 651.7)    | 17.8 (24.6 - 11.9) |

Supplementary Table 3. Country-specific burden of haemorrhagic stroke in 1990 (rates per 100,000 person-years and absolute numbers with 95% uncertainty intervals)

| Country              | Absolute numbers (95% UI) |                     |                          |                    | Rates (95% UI)       |                      |                          |                   |
|----------------------|---------------------------|---------------------|--------------------------|--------------------|----------------------|----------------------|--------------------------|-------------------|
|                      | Prevalence                | Deaths              | DALYs                    | YLDs               | Prevalence           | Deaths               | DALYs                    | YLDs              |
| Afghanistan          | 392 (507 - 312)           | 4246 (6899 - 2504)  | 133131 (217798 - 75854)  | 66 (96 - 42)       | 7.6 (9.7 - 6.2)      | 139 (216.3 - 90.1)   | 3022.5 (4835.6 - 1807.6) | 1.3 (1.8 - 0.8)   |
| Angola               | 961 (1130 - 815)          | 3876 (5588 - 2466)  | 120259 (170461 - 78496)  | 156 (221 - 103)    | 19.4 (22.9 - 16.5)   | 111.4 (158.6 - 70.9) | 2425.4 (3506 - 1525)     | 3 (4.3 - 2)       |
| Albania              | 743 (898 - 576)           | 2409 (2701 - 2238)  | 42044 (47004 - 38743)    | 117 (167 - 76)     | 30.5 (37.2 - 23.7)   | 146.7 (165 - 135.2)  | 2108.5 (2344.9 - 1945.1) | 4.7 (6.7 - 3.1)   |
| Andorra              | 68 (88 - 49)              | 17 (24 - 10)        | 228 (307 - 145)          | 10 (15 - 6)        | 104.1 (132.4 - 76.2) | 23.1 (32.4 - 13.7)   | 342.2 (462.5 - 221.8)    | 15.2 (22.6 - 9.3) |
| United Arab Emirates | 77 (104 - 51)             | 258 (377 - 158)     | 8867 (12778 - 5541)      | 13 (20 - 8)        | 7.1 (9.2 - 4.9)      | 65.5 (95.8 - 35.4)   | 1188.5 (1737.1 - 684.3)  | 1.2 (1.8 - 0.7)   |
| Argentina            | 18619 (21371 - 15846)     | 9607 (13206 - 8262) | 225408 (302551 - 195074) | 2797 (3782 - 1837) | 62.6 (71.8 - 53.3)   | 34 (46.8 - 29.2)     | 756.4 (1016.5 - 655.2)   | 9.4 (12.6 - 6.1)  |
| Armenia              | 1117 (1333 - 920)         | 1210 (1475 - 957)   | 26169 (31015 - 21705)    | 175 (244 - 114)    | 38.3 (45.7 - 31.8)   | 51.3 (63.8 - 39.7)   | 966.4 (1159.8 - 791.4)   | 5.9 (8.3 - 3.9)   |
| Antigua and Barbuda  | 40 (51 - 31)              | 23 (28 - 20)        | 468 (555 - 400)          | 6 (8 - 4)          | 83.4 (104.5 - 64)    | 49.4 (59.7 - 41.2)   | 966.8 (1147.9 - 830.1)   | 12.3 (17.1 - 8)   |

|              |                       |                       |                          |                    |                      |                     |                          |                   |
|--------------|-----------------------|-----------------------|--------------------------|--------------------|----------------------|---------------------|--------------------------|-------------------|
| Australia    | 16524 (19120 - 14139) | 3958 (5152 - 3444)    | 73201 (90779 - 64381)    | 2441 (3429 - 1653) | 92 (106.6 - 78.7)    | 22.2 (28.9 - 19.3)  | 407.4 (506.5 - 358.5)    | 13.6 (19.1 - 9.2) |
| Austria      | 10620 (14615 - 7161)  | 3297 (4066 - 2717)    | 50766 (60746 - 43818)    | 1533 (2274 - 935)  | 103.3 (137 - 71.9)   | 29 (35.8 - 24.2)    | 494.5 (592.7 - 432.8)    | 15.1 (22.2 - 9.4) |
| Azerbaijan   | 1971 (2363 - 1663)    | 3522 (4038 - 3026)    | 81687 (92832 - 71583)    | 308 (426 - 204)    | 39.8 (48 - 33.4)     | 103.8 (121 - 87.8)  | 1885.8 (2154.7 - 1626.3) | 6.1 (8.4 - 4.1)   |
| Burundi      | 417 (519 - 332)       | 2903 (4315 - 1995)    | 73361 (104545 - 51955)   | 70 (100 - 45)      | 14 (17.1 - 11.5)     | 154 (240.4 - 103)   | 3144.9 (4592.3 - 2175.9) | 2.3 (3.3 - 1.6)   |
| Belgium      | 13638 (18235 - 9602)  | 4210 (5137 - 3503)    | 65594 (78647 - 56880)    | 1947 (2943 - 1205) | 102.3 (134.3 - 72.8) | 28.9 (35.3 - 24.1)  | 492.7 (587 - 432.1)      | 14.8 (22.2 - 9.2) |
| Benin        | 562 (663 - 444)       | 1160 (1551 - 897)     | 35525 (44703 - 27963)    | 90 (125 - 57)      | 21.7 (25.8 - 17.3)   | 61 (85.3 - 44)      | 1238 (1648.6 - 963.9)    | 3.4 (4.7 - 2.2)   |
| Burkina Faso | 979 (1161 - 824)      | 948 (1286 - 661)      | 27695 (35545 - 19991)    | 157 (218 - 103)    | 22.3 (26.3 - 18.7)   | 28.2 (40 - 18.7)    | 626.5 (835.4 - 439.8)    | 3.5 (4.8 - 2.3)   |
| Bangladesh   | 48988 (57425 - 41707) | 32031 (43432 - 23746) | 769105 (991699 - 596039) | 7345 (9960 - 4781) | 86.7 (102.3 - 72.7)  | 73.4 (103.1 - 52.7) | 1456.3 (1904.5 - 1100.2) | 12.7 (17.2 - 8.3) |
| Bulgaria     | 2831 (3511 - 2137)    | 10423 (11655 - 8424)  | 198719 (221049 - 162235) | 440 (633 - 272)    | 26.7 (32.6 - 20.3)   | 95.7 (107.2 - 77.3) | 1774.6 (1975.8 - 1446.6) | 4.2 (6 - 2.6)     |
| Bahrain      | 23 (29 - 17)          | 82 (98 - 61)          | 2756 (3297 - 2160)       | 4 (6 - 2)          | 7.7 (9.7 - 6.1)      | 48.2 (58.7 - 33.8)  | 1021.1 (1226.1 - 763.7)  | 1.3 (1.9 - 0.8)   |

|                        |                       |                       |                             |                    |                       |                    |                          |                   |
|------------------------|-----------------------|-----------------------|-----------------------------|--------------------|-----------------------|--------------------|--------------------------|-------------------|
| The Bahamas            | 118 (143 - 95)        | 66 (80 - 57)          | 1711 (2050 - 1480)          | 18 (26 - 11)       | 81.3 (101.2 - 64.3)   | 52 (63.8 - 44.1)   | 1071.3 (1301 - 930.7)    | 12 (17.5 - 7.6)   |
| Bosnia and Herzegovina | 1063 (1296 - 814)     | 1993 (2261 - 1699)    | 43654 (49406 - 38350)       | 170 (239 - 108)    | 25.1 (30.5 - 19.2)    | 62.8 (72.1 - 52.8) | 1165.4 (1326.9 - 1020.9) | 4 (5.6 - 2.5)     |
| Belarus                | 723 (913 - 580)       | 5070 (6388 - 3198)    | 113654 (140642 - 76869)     | 121 (173 - 77)     | 6.5 (8.2 - 5.2)       | 44.5 (55.8 - 28)   | 992.7 (1225.2 - 680.5)   | 1.1 (1.6 - 0.7)   |
| Belize                 | 77 (95 - 63)          | 33 (39 - 27)          | 889 (1025 - 749)            | 11 (16 - 8)        | 86 (108.4 - 69.3)     | 38.3 (45.3 - 31.2) | 805.8 (934.6 - 672.8)    | 12.6 (17.9 - 8.2) |
| Bolivia                | 1153 (1410 - 954)     | 1408 (1677 - 1163)    | 52782 (63703 - 42933)       | 183 (265 - 121)    | 30.2 (37.6 - 25.3)    | 41 (48.9 - 33.6)   | 1040 (1231.6 - 859.1)    | 4.7 (6.8 - 3.1)   |
| Brazil                 | 33223 (38820 - 28360) | 45442 (51193 - 39139) | 1241884 (1380959 - 1077714) | 5150 (7230 - 3353) | 35.1 (41.7 - 29.5)    | 58.2 (66.3 - 50)   | 1295.2 (1444.5 - 1119.5) | 5.3 (7.5 - 3.5)   |
| Barbados               | 194 (235 - 162)       | 94 (119 - 80)         | 1765 (2102 - 1556)          | 28 (39 - 19)       | 79.8 (95.2 - 66.4)    | 38 (47.7 - 32.3)   | 745.1 (885.2 - 656.6)    | 11.7 (16.3 - 7.7) |
| Brunei                 | 199 (238 - 164)       | 63 (74 - 49)          | 1656 (1932 - 1299)          | 30 (42 - 20)       | 181.6 (222.8 - 146.6) | 73.4 (87.3 - 55.9) | 1466 (1697 - 1135.1)     | 26.9 (37.5 - 18)  |
| Bhutan                 | 243 (286 - 203)       | 127 (198 - 79)        | 3700 (5801 - 2349)          | 37 (51 - 24)       | 86.5 (102.2 - 70.9)   | 63.8 (96.2 - 40.5) | 1313.6 (2041.8 - 817.6)  | 12.9 (17.8 - 8.4) |
| Botswana               | 202 (238 - 166)       | 210 (287 - 139)       | 5041 (7030 - 3319)          | 32 (45 - 21)       | 31.2 (36.6 - 24.7)    | 56.1 (74.4 - 37.5) | 952.5 (1303.5 - 625.7)   | 4.7 (6.7 - 3.1)   |

|                                  |                             |                           |                                |                          |                       |                       |                          |                   |
|----------------------------------|-----------------------------|---------------------------|--------------------------------|--------------------------|-----------------------|-----------------------|--------------------------|-------------------|
| Central African Republic         | 350 (409 - 293)             | 1339 (1753 - 904)         | 36608 (48419 - 24813)          | 56 (80 - 37)             | 20.5 (24 - 17.1)      | 100 (132.3 - 66.5)    | 2187.8 (2880.3 - 1487.3) | 3.2 (4.6 - 2.1)   |
| Canada                           | 37770 (46339 - 30913)       | 6187 (7752 - 5302)        | 107062 (128051 - 94509)        | 5491 (7677 - 3681)       | 127.5 (156.6 - 104.5) | 21 (26.4 - 18)        | 362.5 (433.7 - 319.6)    | 18.5 (26 - 12.4)  |
| Switzerland                      | 9516 (12633 - 6938)         | 2376 (3213 - 1808)        | 33451 (43155 - 26995)          | 1338 (1978 - 848)        | 106.5 (140.4 - 78.8)  | 23.6 (31.6 - 18.1)    | 366.8 (468.2 - 298.8)    | 15.2 (22.5 - 9.7) |
| Chile                            | 5379 (6220 - 4564)          | 2770 (3958 - 2285)        | 60876 (85036 - 51251)          | 823 (1117 - 553)         | 54.8 (63.9 - 46.2)    | 32.9 (47.2 - 27)      | 645.6 (905.9 - 539.7)    | 8.3 (11.3 - 5.5)  |
| China                            | 1268587 (1321531 - 1213944) | 988263 (1100203 - 869269) | 21698559 (24229403 - 19249450) | 191373 (255310 - 130030) | 168 (175.1 - 160.2)   | 148.1 (164.1 - 130.4) | 2721.6 (3018.9 - 2402.2) | 25 (33.4 - 17)    |
| Cote d'Ivoire                    | 1499 (1769 - 1248)          | 3199 (3893 - 2606)        | 104182 (126648 - 82544)        | 240 (335 - 159)          | 23.5 (28.1 - 19.4)    | 70.9 (86.2 - 57.2)    | 1527.1 (1860.3 - 1247)   | 3.7 (5 - 2.4)     |
| Cameroon                         | 1436 (1715 - 1170)          | 3054 (3796 - 2455)        | 89027 (110683 - 70612)         | 229 (322 - 149)          | 22.4 (27 - 18.2)      | 62.6 (78.7 - 49.6)    | 1293.2 (1608.4 - 1043.4) | 3.5 (4.9 - 2.3)   |
| Democratic Republic of the Congo | 3567 (4380 - 2797)          | 12371 (15703 - 9019)      | 370935 (460551 - 279198)       | 575 (830 - 364)          | 19.6 (24.2 - 15.4)    | 98.4 (132.3 - 66.4)   | 2059.5 (2601 - 1505.9)   | 3.1 (4.4 - 2)     |
| Congo                            | 271 (325 - 229)             | 1533 (1944 - 1270)        | 39202 (48752 - 32280)          | 44 (61 - 28)             | 20.6 (24.9 - 17.2)    | 156 (202.9 - 128.1)   | 3268.2 (4104.9 - 2696)   | 3.3 (4.6 - 2.1)   |

|                |                          |                       |                          |                       |                      |                      |                          |                    |
|----------------|--------------------------|-----------------------|--------------------------|-----------------------|----------------------|----------------------|--------------------------|--------------------|
| Colombia       | 19352 (21690 - 16765)    | 9125 (10758 - 8279)   | 215639 (250992 - 195775) | 2891 (3849 - 1968)    | 108.1 (121.5 - 93.8) | 61.8 (73.4 - 55.7)   | 1161.5 (1360.2 - 1055.8) | 15.8 (20.9 - 10.7) |
| Comoros        | 31 (38 - 25)             | 213 (294 - 144)       | 5388 (7426 - 3674)       | 5 (7 - 3)             | 13.4 (16.1 - 10.6)   | 145.6 (201.5 - 99.3) | 2913.8 (4045 - 1974.8)   | 2.2 (3.2 - 1.5)    |
| Cape Verde     | 44 (53 - 36)             | 147 (192 - 112)       | 3393 (4477 - 2660)       | 7 (10 - 5)            | 21.7 (26.4 - 17.8)   | 83.1 (107.7 - 62.9)  | 1538.8 (2041.5 - 1205.8) | 3.4 (4.8 - 2.2)    |
| Costa Rica     | 1989 (2267 - 1710)       | 331 (540 - 253)       | 6849 (9971 - 5628)       | 300 (414 - 203)       | 109.8 (125.8 - 93.1) | 21.3 (35.7 - 15.9)   | 373.2 (558.8 - 300.8)    | 16.4 (22.5 - 11)   |
| Cuba           | 7560 (8940 - 6421)       | 2656 (3335 - 2304)    | 57371 (70709 - 51028)    | 1112 (1513 - 730)     | 80.2 (95.2 - 67.8)   | 28.4 (35.7 - 24.7)   | 611.7 (754 - 543.7)      | 11.8 (16 - 7.7)    |
| Cyprus         | 722 (925 - 501)          | 324 (397 - 220)       | 5513 (6449 - 4027)       | 104 (154 - 63)        | 109.7 (140.4 - 76.2) | 47.7 (58.1 - 32.6)   | 839.1 (980.7 - 612.5)    | 15.8 (23.6 - 9.5)  |
| Czech Republic | 3068 (3839 - 2345)       | 4745 (5496 - 3771)    | 94980 (108997 - 76609)   | 476 (697 - 305)       | 26.2 (32.6 - 20.2)   | 38 (44 - 30.4)       | 768.9 (880.6 - 622.6)    | 4.1 (6 - 2.6)      |
| Germany        | 128943 (152646 - 105589) | 39028 (46523 - 31085) | 588825 (680147 - 498739) | 18485 (25644 - 12008) | 117.6 (138.2 - 96.4) | 32.1 (38.1 - 25.9)   | 530.8 (609.2 - 452.5)    | 17 (23.6 - 11.1)   |
| Djibouti       | 42 (53 - 34)             | 200 (302 - 116)       | 5525 (8349 - 3217)       | 7 (10 - 4)            | 13.2 (16.7 - 10.7)   | 107.1 (160.6 - 62.2) | 2167 (3285.2 - 1255.6)   | 2.2 (3.2 - 1.4)    |
| Dominica       | 38 (50 - 30)             | 24 (28 - 20)          | 511 (594 - 438)          | 6 (8 - 4)             | 80.6 (104.1 - 64.4)  | 53.2 (63 - 44.8)     | 1035.7 (1206.1 - 880.7)  | 11.7 (17.2 - 7.6)  |

|                    |                       |                       |                            |                     |                       |                      |                          |                    |
|--------------------|-----------------------|-----------------------|----------------------------|---------------------|-----------------------|----------------------|--------------------------|--------------------|
| Denmark            | 2832 (3382 - 2264)    | 2665 (3178 - 2094)    | 41409 (48491 - 34735)      | 417 (581 - 275)     | 40.8 (48.3 - 33)      | 34.5 (41 - 27.6)     | 593.6 (695.3 - 501.1)    | 6.1 (8.5 - 4)      |
| Dominican Republic | 3300 (4430 - 2560)    | 1090 (1373 - 944)     | 29775 (36676 - 26057)      | 496 (774 - 321)     | 91 (124.9 - 69.7)     | 34.1 (43.4 - 29)     | 706.8 (876.8 - 615.3)    | 13.4 (20.9 - 8.5)  |
| Algeria            | 1094 (1380 - 880)     | 6442 (7648 - 5335)    | 208457 (251245 - 169268)   | 184 (264 - 117)     | 7.9 (9.8 - 6.3)       | 63.5 (75.5 - 51.9)   | 1313.3 (1568.7 - 1082.1) | 1.3 (1.9 - 0.8)    |
| Ecuador            | 1702 (2119 - 1413)    | 1176 (1479 - 1042)    | 33781 (41380 - 30069)      | 272 (389 - 179)     | 28 (35.6 - 22.9)      | 22.9 (29.5 - 20.1)   | 520.6 (645.5 - 463.4)    | 4.4 (6.3 - 2.8)    |
| Egypt              | 2792 (3591 - 2158)    | 34947 (40170 - 28480) | 1211436 (1392435 - 966553) | 473 (701 - 302)     | 7.6 (9.6 - 5.8)       | 113.2 (131.3 - 89.4) | 2557.8 (2927.1 - 2088.1) | 1.3 (1.9 - 0.8)    |
| Eritrea            | 224 (282 - 174)       | 725 (954 - 425)       | 21197 (28009 - 12471)      | 38 (54 - 24)        | 13.4 (16.5 - 10.7)    | 94.3 (131.6 - 52.2)  | 1895.1 (2529.1 - 1097)   | 2.2 (3.2 - 1.4)    |
| Spain              | 52233 (64762 - 39153) | 15367 (18924 - 13144) | 255794 (301161 - 228087)   | 7531 (10765 - 4736) | 107.3 (132.3 - 81.2)  | 30.4 (37.1 - 26.1)   | 544.9 (636.5 - 486)      | 15.6 (22.1 - 9.8)  |
| Estonia            | 262 (353 - 192)       | 678 (840 - 451)       | 14145 (17380 - 9786)       | 43 (66 - 25)        | 14.9 (19.8 - 11.1)    | 36.8 (45.6 - 24.6)   | 777.6 (953.1 - 540.4)    | 2.4 (3.7 - 1.4)    |
| Ethiopia           | 1915 (2232 - 1633)    | 17676 (22798 - 12681) | 445140 (547103 - 336355)   | 334 (464 - 225)     | 7.3 (8.4 - 6.2)       | 102.2 (137.2 - 68.6) | 2070.4 (2649.2 - 1496.1) | 1.3 (1.8 - 0.8)    |
| Finland            | 10017 (11602 - 8472)  | 1793 (2195 - 1497)    | 36111 (42932 - 31556)      | 1433 (1976 - 951)   | 160.6 (184.9 - 136.6) | 28.2 (34.4 - 23.6)   | 590.8 (695.3 - 516.7)    | 23.1 (31.7 - 15.3) |



|                                |                       |                       |                          |                      |                       |                       |                          |                    |
|--------------------------------|-----------------------|-----------------------|--------------------------|----------------------|-----------------------|-----------------------|--------------------------|--------------------|
| Fiji                           | 550 (625 - 483)       | 351 (451 - 258)       | 11033 (14151 - 8226)     | 83 (111 - 56)        | 176.4 (199.2 - 156.1) | 121.5 (153.7 - 89.4)  | 2679.2 (3435.1 - 1972.1) | 25.8 (34.4 - 17.7) |
| France                         | 32880 (46999 - 23390) | 21343 (26206 - 17812) | 315889 (368738 - 274221) | 4826 (7357 - 2866)   | 45.5 (64.6 - 32.4)    | 26.1 (31.5 - 22.1)    | 441.7 (510.1 - 386)      | 6.8 (10.2 - 4.1)   |
| Federated States of Micronesia | 68 (78 - 56)          | 40 (58 - 26)          | 1158 (1744 - 738)        | 10 (14 - 7)          | 166.8 (195 - 135.4)   | 104.3 (146.2 - 68.9)  | 2363.2 (3510.1 - 1511.1) | 24.7 (34.6 - 16.4) |
| Gabon                          | 133 (159 - 112)       | 723 (952 - 591)       | 16905 (21118 - 13873)    | 21 (30 - 14)         | 20.4 (24.4 - 17)      | 127.4 (170.7 - 104.2) | 2619.5 (3294.8 - 2154.1) | 3.2 (4.5 - 2.1)    |
| United Kingdom                 | 87328 (97737 - 80079) | 27508 (33274 - 23767) | 431135 (515659 - 382223) | 12581 (16714 - 8733) | 111.6 (123.4 - 102.9) | 32.1 (38.7 - 27.9)    | 556.5 (662.9 - 494.8)    | 16.3 (21.7 - 11.3) |
| Georgia                        | 2284 (2713 - 1905)    | 5937 (7586 - 4947)    | 119088 (147503 - 101166) | 353 (498 - 230)      | 40 (47.5 - 33.4)      | 111.8 (144.1 - 92.6)  | 2108.5 (2630.1 - 1782.4) | 6.2 (8.7 - 4)      |
| Ghana                          | 1665 (1978 - 1326)    | 1419 (2051 - 1056)    | 50885 (70803 - 39915)    | 268 (379 - 176)      | 22.4 (26.8 - 17.8)    | 24.6 (36.6 - 17.1)    | 587.1 (853.1 - 436.2)    | 3.5 (5 - 2.3)      |
| Guinea                         | 743 (904 - 602)       | 1411 (1788 - 871)     | 46663 (59374 - 28277)    | 120 (172 - 76)       | 21.8 (26.1 - 17.6)    | 56.3 (73.5 - 33.7)    | 1194.7 (1514.4 - 744.1)  | 3.4 (4.9 - 2.2)    |
| The Gambia                     | 97 (114 - 80)         | 169 (268 - 106)       | 5376 (8098 - 3478)       | 16 (22 - 10)         | 23.1 (27.8 - 19.2)    | 58.7 (92.4 - 36.8)    | 1186 (1901.8 - 732.2)    | 3.6 (5.1 - 2.4)    |
| Guinea-Bissau                  | 122 (143 - 101)       | 245 (387 - 138)       | 7857 (11863 - 4636)      | 19 (27 - 13)         | 22.4 (26.2 - 18.7)    | 59.6 (93 - 31.1)      | 1295.3 (2052.4 - 723.8)  | 3.5 (4.8 - 2.3)    |

|                                                  |                      |                    |                          |                    |                       |                      |                          |                    |
|--------------------------------------------------|----------------------|--------------------|--------------------------|--------------------|-----------------------|----------------------|--------------------------|--------------------|
| Equatorial Guinea                                | 46 (56 - 37)         | 238 (339 - 159)    | 6398 (9004 - 4319)       | 7 (10 - 5)         | 20.3 (24.9 - 16.5)    | 134.3 (191.5 - 90.1) | 2959.7 (4228.6 - 1963.4) | 3.2 (4.5 - 2.1)    |
| Greece                                           | 10935 (13026 - 9101) | 7380 (8708 - 6193) | 107114 (122860 - 93235)  | 1579 (2177 - 1065) | 82.1 (97.2 - 68.6)    | 53.1 (62.6 - 44.7)   | 802.5 (917.5 - 702.9)    | 12 (16.6 - 8.1)    |
| Grenada                                          | 56 (71 - 45)         | 38 (45 - 32)       | 820 (947 - 709)          | 8 (12 - 5)         | 81.1 (101.5 - 65.6)   | 55.3 (66.5 - 47.5)   | 1139.2 (1323.3 - 989.7)  | 11.9 (17 - 7.7)    |
| Guatemala                                        | 4389 (5014 - 3788)   | 837 (1213 - 686)   | 24599 (34665 - 20522)    | 625 (841 - 430)    | 104.8 (121.9 - 88.7)  | 24.2 (35.4 - 19.4)   | 504 (718.5 - 417.3)      | 14.5 (19.5 - 10)   |
| Guyana                                           | 357 (461 - 273)      | 351 (433 - 302)    | 8761 (10401 - 7637)      | 53 (78 - 34)       | 87.6 (115.5 - 65.5)   | 91.7 (113.9 - 78.9)  | 2049.8 (2459.3 - 1773)   | 12.8 (19.3 - 8.1)  |
| Hong Kong Special Administrative Region of China | 11709 (14618 - 9747) | 2259 (2751 - 1996) | 43833 (51716 - 38953)    | 1759 (2521 - 1149) | 225.2 (279.5 - 187.8) | 47.9 (58.9 - 42)     | 844.9 (1001.9 - 752.4)   | 33.7 (48.3 - 22)   |
| Honduras                                         | 2328 (2726 - 1985)   | 554 (777 - 437)    | 21438 (30677 - 16505)    | 350 (476 - 232)    | 106.9 (128.4 - 89)    | 24.3 (33.7 - 19.1)   | 626.8 (871.4 - 490.1)    | 15.7 (21.7 - 10.4) |
| Croatia                                          | 1550 (1964 - 1230)   | 2615 (2986 - 2131) | 59631 (67302 - 49561)    | 242 (361 - 153)    | 27.6 (34.7 - 22)      | 45.2 (51.6 - 36.9)   | 1018.4 (1144.3 - 849.4)  | 4.3 (6.4 - 2.8)    |
| Haiti                                            | 2921 (3615 - 2340)   | 3370 (4254 - 2809) | 121142 (146940 - 101623) | 437 (636 - 286)    | 83.8 (104.8 - 65.7)   | 94.6 (123.9 - 78.2)  | 2283.4 (2853.3 - 1902.5) | 12.2 (18 - 8)      |
| Hungary                                          | 3865 (4575 - 3238)   | 7124 (8134 - 5324) | 140638 (159718 - 110916) | 594 (841 - 388)    | 31.1 (36.6 - 26.2)    | 54.5 (62.3 - 40.6)   | 1093.9 (1243.2 - 868.1)  | 4.8 (6.8 - 3.2)    |

|           |                          |                          |                             |                       |                       |                     |                          |                    |
|-----------|--------------------------|--------------------------|-----------------------------|-----------------------|-----------------------|---------------------|--------------------------|--------------------|
| Indonesia | 159033 (180927 - 141008) | 71149 (85225 - 57760)    | 1884112 (2234052 - 1594844) | 23992 (32426 - 16257) | 178.5 (206.7 - 155.4) | 90.7 (109.9 - 70.7) | 1858.5 (2204.4 - 1541.4) | 26.3 (35.8 - 17.7) |
| India     | 458645 (515806 - 402862) | 233845 (289583 - 179841) | 6727232 (8072972 - 5311590) | 68926 (94513 - 46281) | 86 (97.8 - 74.6)      | 56.7 (72.1 - 42.9)  | 1243 (1525.7 - 961.2)    | 12.7 (17.5 - 8.6)  |
| Ireland   | 3856 (5217 - 2821)       | 1211 (1499 - 1054)       | 20729 (25115 - 18310)       | 560 (842 - 346)       | 105.2 (140.6 - 78.2)  | 32.4 (40.2 - 28.2)  | 569.5 (688.5 - 503.3)    | 15.3 (22.7 - 9.6)  |
| Iran      | 3505 (4222 - 2931)       | 12124 (14408 - 10036)    | 384880 (455210 - 316529)    | 588 (834 - 385)       | 10.8 (13 - 9)         | 58.2 (70.2 - 47.7)  | 1143.3 (1358.4 - 940.3)  | 1.8 (2.6 - 1.2)    |
| Iraq      | 622 (794 - 458)          | 4489 (5665 - 3550)       | 131957 (166397 - 104669)    | 105 (156 - 65)        | 6.8 (8.7 - 5)         | 60.1 (76.6 - 46.3)  | 1259 (1598.8 - 986.3)    | 1.2 (1.7 - 0.7)    |
| Iceland   | 235 (302 - 183)          | 73 (90 - 60)             | 1142 (1347 - 975)           | 34 (49 - 22)          | 91.3 (117.4 - 71.3)   | 26.7 (32.9 - 22.1)  | 441 (518.2 - 376.5)      | 13.3 (19.2 - 8.6)  |
| Israel    | 2177 (2527 - 1833)       | 1123 (1498 - 977)        | 18906 (24771 - 16491)       | 319 (437 - 212)       | 55.8 (64.9 - 46.7)    | 29.3 (39.1 - 25.5)  | 492.4 (646.1 - 429.3)    | 8.2 (11.2 - 5.4)   |
| Italy     | 64884 (74783 - 54479)    | 26097 (31376 - 22182)    | 410109 (475267 - 360529)    | 9376 (12745 - 6275)   | 83.4 (95.6 - 70.3)    | 31.6 (38 - 26.9)    | 533.4 (618 - 471.7)      | 12.2 (16.5 - 8.1)  |
| Jamaica   | 1430 (1838 - 1091)       | 699 (888 - 606)          | 14049 (16565 - 12306)       | 212 (305 - 137)       | 85.3 (109.9 - 64.5)   | 40.9 (51.9 - 35.4)  | 806.7 (957.8 - 706.4)    | 12.6 (18.1 - 8.1)  |
| Jordan    | 120 (147 - 91)           | 487 (611 - 375)          | 12069 (14797 - 9401)        | 20 (29 - 12)          | 7.3 (9 - 5.2)         | 39.2 (49.8 - 30.1)  | 754.6 (941.1 - 580.9)    | 1.2 (1.8 - 0.7)    |

|             |                          |                       |                           |                       |                       |                      |                          |                    |
|-------------|--------------------------|-----------------------|---------------------------|-----------------------|-----------------------|----------------------|--------------------------|--------------------|
| Japan       | 235759 (285265 - 189278) | 48813 (57924 - 43562) | 980183 (1106043 - 882687) | 35100 (49256 - 22986) | 159.9 (192.3 - 129)   | 33.4 (39.9 - 29.7)   | 654.8 (736.8 - 589.9)    | 23.8 (33.3 - 15.7) |
| Kazakhstan  | 5094 (6103 - 4306)       | 9584 (10807 - 7783)   | 210127 (238003 - 174244)  | 791 (1122 - 526)      | 40.1 (47.9 - 33.9)    | 90.6 (103 - 72.9)    | 1767.9 (1998.2 - 1458.2) | 6.2 (8.7 - 4.1)    |
| Kenya       | 1631 (1995 - 1324)       | 3681 (4718 - 2789)    | 82479 (100985 - 67851)    | 274 (401 - 174)       | 14.3 (17.3 - 11.6)    | 55.5 (74.5 - 39)     | 976 (1232.2 - 760)       | 2.4 (3.4 - 1.5)    |
| Kyrgyzstan  | 1152 (1360 - 944)        | 2092 (2433 - 1568)    | 50499 (57886 - 39894)     | 180 (252 - 121)       | 38.5 (45.6 - 31.4)    | 81.6 (95.8 - 60.1)   | 1787.6 (2056.2 - 1401.1) | 5.9 (8.4 - 4)      |
| Cambodia    | 6950 (8073 - 5855)       | 3610 (4390 - 2711)    | 113569 (137699 - 85910)   | 874 (1185 - 593)      | 183.5 (217.2 - 151.5) | 97.1 (122.1 - 71)    | 2204.9 (2669.9 - 1663.6) | 22 (30 - 15.1)     |
| Kiribati    | 54 (61 - 45)             | 37 (47 - 30)          | 1273 (1600 - 1023)        | 8 (11 - 5)            | 166.9 (194.8 - 137.7) | 108.7 (136.2 - 87.6) | 2836.8 (3577.8 - 2251.9) | 24.5 (34 - 16.7)   |
| South Korea | 45485 (55334 - 37480)    | 27380 (30450 - 22173) | 640630 (707693 - 543898)  | 6836 (9633 - 4490)    | 160.7 (199.9 - 132.4) | 120.4 (135.5 - 94.5) | 2238.3 (2479.9 - 1848.7) | 23.7 (33.6 - 15.6) |
| Kuwait      | 104 (135 - 81)           | 144 (172 - 105)       | 4889 (5718 - 3781)        | 18 (26 - 11)          | 9.2 (11.7 - 7)        | 27.5 (34.2 - 18.5)   | 489.2 (588.3 - 351)      | 1.5 (2.2 - 1)      |
| Laos        | 3243 (3686 - 2765)       | 1597 (2421 - 992)     | 51470 (77259 - 31624)     | 480 (657 - 324)       | 174.6 (197.8 - 148.2) | 87.4 (130.1 - 54.2)  | 2038.5 (3101.1 - 1236.1) | 25.3 (34.1 - 17.3) |
| Lebanon     | 153 (198 - 117)          | 749 (1008 - 435)      | 17943 (23550 - 11095)     | 26 (38 - 16)          | 7.6 (9.8 - 5.9)       | 46.6 (63.5 - 26.4)   | 884.1 (1171.9 - 536)     | 1.3 (1.9 - 0.8)    |

|                                              |                       |                    |                          |                    |                       |                    |                          |                    |
|----------------------------------------------|-----------------------|--------------------|--------------------------|--------------------|-----------------------|--------------------|--------------------------|--------------------|
| Liberia                                      | 249 (303 - 204)       | 480 (582 - 362)    | 17373 (22074 - 12559)    | 39 (57 - 26)       | 22.9 (27.8 - 18.7)    | 59.7 (72.8 - 42.6) | 1277.3 (1540.2 - 959.8)  | 3.5 (5 - 2.4)      |
| Libya                                        | 50 (74 - 36)          | 1036 (1272 - 820)  | 43813 (55186 - 33945)    | 8 (13 - 5)         | 2.2 (3.2 - 1.5)       | 58.1 (73 - 45.5)   | 1294.4 (1588 - 1027)     | 0.4 (0.6 - 0.2)    |
| Saint Lucia                                  | 85 (104 - 67)         | 53 (63 - 46)       | 1157 (1348 - 1016)       | 12 (17 - 8)        | 87.1 (107 - 68.5)     | 56.9 (68.3 - 48.9) | 1148.5 (1333 - 1007.6)   | 12.7 (17.8 - 8.2)  |
| Sri Lanka                                    | 20134 (23089 - 17764) | 2603 (3328 - 2252) | 80585 (97361 - 71030)    | 3009 (4094 - 2025) | 187.9 (219.9 - 163.8) | 24.5 (31.9 - 20.9) | 600.4 (735.7 - 526.8)    | 27.6 (37.4 - 18.5) |
| Lesotho                                      | 288 (347 - 240)       | 476 (586 - 351)    | 10998 (13475 - 8345)     | 44 (62 - 29)       | 32.5 (39.5 - 26.9)    | 70.4 (88.1 - 50.6) | 1322.7 (1623.7 - 981.9)  | 4.9 (6.9 - 3.2)    |
| Lithuania                                    | 400 (594 - 298)       | 1245 (1487 - 909)  | 26372 (31332 - 20061)    | 66 (103 - 40)      | 9.9 (14.7 - 7.4)      | 30.1 (36 - 22.1)   | 646.5 (769 - 494.8)      | 1.7 (2.5 - 1)      |
| Luxembourg                                   | 466 (680 - 344)       | 221 (274 - 187)    | 3471 (4108 - 3014)       | 68 (106 - 41)      | 96.6 (138.6 - 72.4)   | 43.8 (54 - 37.2)   | 716.4 (845.7 - 620.3)    | 14.1 (21.7 - 8.6)  |
| Latvia                                       | 341 (463 - 242)       | 2209 (2734 - 1531) | 39287 (48189 - 29092)    | 57 (87 - 34)       | 11.2 (14.9 - 8.1)     | 68.5 (85 - 47.6)   | 1233.4 (1506.7 - 916.5)  | 1.9 (2.9 - 1.1)    |
| Macao Special Administrative Region of China | 444 (535 - 365)       | 143 (182 - 123)    | 3029 (3731 - 2632)       | 66 (94 - 43)       | 173.3 (210.5 - 141.1) | 58.7 (75.3 - 50.3) | 1156.2 (1426.2 - 1000.8) | 25.8 (36.8 - 16.5) |
| Morocco                                      | 1010 (1267 - 798)     | 4493 (5330 - 3711) | 159847 (191867 - 132693) | 170 (250 - 110)    | 7.3 (9 - 5.8)         | 41.4 (50.3 - 32.7) | 936.2 (1109.1 - 779.2)   | 1.2 (1.8 - 0.8)    |

|                  |                       |                       |                          |                     |                       |                     |                          |                    |
|------------------|-----------------------|-----------------------|--------------------------|---------------------|-----------------------|---------------------|--------------------------|--------------------|
| Moldova          | 538 (755 - 396)       | 2935 (3276 - 2187)    | 65337 (72798 - 50643)    | 89 (140 - 53)       | 12.8 (17.9 - 9.5)     | 78.6 (88.3 - 58)    | 1607.4 (1793.8 - 1236.7) | 2.1 (3.3 - 1.3)    |
| Madagascar       | 860 (1071 - 696)      | 8464 (10225 - 6899)   | 243831 (286052 - 202659) | 144 (207 - 93)      | 13.6 (16.8 - 10.7)    | 194 (243.6 - 152.3) | 4320 (5177.9 - 3539.1)   | 2.3 (3.3 - 1.4)    |
| Maldives         | 160 (189 - 136)       | 75 (91 - 58)          | 2943 (3708 - 2331)       | 24 (33 - 16)        | 181.8 (211 - 153)     | 76.5 (98.4 - 58.5)  | 1929.4 (2318.8 - 1494.2) | 26.6 (36 - 17.9)   |
| Mexico           | 49555 (51427 - 47623) | 14834 (17254 - 13113) | 341414 (386700 - 302153) | 7515 (10015 - 5200) | 107 (111.5 - 102.5)   | 37.4 (43.5 - 33.1)  | 688 (782.5 - 610.5)      | 16 (21.3 - 11.1)   |
| Marshall Islands | 32 (37 - 27)          | 15 (19 - 12)          | 490 (605 - 384)          | 5 (7 - 3)           | 181.9 (214.9 - 154.2) | 93.5 (118.6 - 71.6) | 2084.5 (2598.2 - 1599.1) | 26.9 (37.2 - 18.1) |
| Macedonia        | 487 (615 - 394)       | 992 (1147 - 870)      | 24204 (27581 - 21561)    | 77 (112 - 48)       | 26.1 (32.5 - 21.3)    | 61.3 (71.8 - 53.2)  | 1317.7 (1512 - 1172.3)   | 4.1 (5.9 - 2.6)    |
| Mali             | 994 (1151 - 853)      | 2065 (2481 - 1471)    | 65018 (77468 - 47766)    | 157 (218 - 105)     | 23 (26.9 - 19.4)      | 58.9 (73.7 - 39.3)  | 1309.5 (1579.4 - 933.5)  | 3.6 (4.9 - 2.4)    |
| Malta            | 361 (489 - 266)       | 118 (136 - 95)        | 1985 (2262 - 1652)       | 53 (79 - 33)        | 102.1 (139.3 - 74.8)  | 35.2 (40.8 - 28.2)  | 569.4 (650.3 - 472.7)    | 14.8 (22.4 - 9.3)  |
| Myanmar          | 36793 (42119 - 31340) | 22747 (35409 - 13928) | 575380 (903983 - 347073) | 5427 (7448 - 3738)  | 169.9 (195.8 - 141.7) | 120 (181.2 - 75.7)  | 2439.2 (3772.3 - 1483.7) | 24.5 (33.6 - 16.8) |
| Montenegro       | 184 (217 - 153)       | 1102 (1296 - 905)     | 18378 (21760 - 14564)    | 29 (40 - 19)        | 31.2 (36.9 - 26)      | 202.4 (237.9 - 167) | 3295.4 (3900.4 - 2628.5) | 4.9 (6.8 - 3.2)    |

|            |                       |                       |                          |                    |                      |                     |                          |                    |
|------------|-----------------------|-----------------------|--------------------------|--------------------|----------------------|---------------------|--------------------------|--------------------|
| Mongolia   | 565 (653 - 480)       | 1883 (2117 - 1664)    | 47851 (53940 - 42351)    | 88 (122 - 59)      | 45.7 (52.9 - 38.7)   | 200 (226.6 - 176.7) | 4018.4 (4530.3 - 3564)   | 7 (9.7 - 4.7)      |
| Mozambique | 1097 (1349 - 858)     | 2510 (3296 - 1700)    | 66029 (83187 - 46657)    | 183 (261 - 118)    | 14.6 (17.8 - 11.7)   | 48.9 (68.5 - 30.5)  | 1001.8 (1301.4 - 684.5)  | 2.4 (3.4 - 1.6)    |
| Mauritania | 233 (268 - 201)       | 416 (530 - 323)       | 11475 (14350 - 9041)     | 37 (52 - 24)       | 22.5 (26 - 19.9)     | 59.1 (76 - 44.8)    | 1170.9 (1477.6 - 907.6)  | 3.5 (4.9 - 2.4)    |
| Mauritius  | 1064 (1213 - 929)     | 374 (427 - 297)       | 10251 (11664 - 8515)     | 160 (218 - 108)    | 175 (200.2 - 152.4)  | 63.1 (73 - 48.2)    | 1446.7 (1651.5 - 1169.7) | 25.9 (34.8 - 17.5) |
| Malawi     | 705 (850 - 580)       | 1657 (2191 - 1265)    | 46546 (58916 - 37236)    | 118 (169 - 76)     | 14.2 (17 - 11.7)     | 57.5 (81.8 - 41.1)  | 1107.2 (1458.6 - 850.4)  | 2.4 (3.3 - 1.5)    |
| Malaysia   | 15811 (18103 - 13653) | 4887 (5576 - 3983)    | 135051 (153031 - 112096) | 2379 (3217 - 1596) | 185 (212.5 - 157.9)  | 62.3 (71.6 - 50.1)  | 1325.6 (1504.9 - 1090.9) | 27.3 (37.2 - 18.7) |
| Namibia    | 221 (268 - 183)       | 441 (523 - 333)       | 10416 (12182 - 8019)     | 35 (49 - 23)       | 30.7 (37 - 25)       | 88.9 (106 - 65.7)   | 1658 (1951.1 - 1266.3)   | 4.7 (6.7 - 3.1)    |
| Niger      | 835 (1008 - 691)      | 1357 (1744 - 881)     | 52473 (68606 - 35680)    | 135 (187 - 87)     | 22.4 (27 - 18.5)     | 50.3 (66.6 - 30)    | 1090.4 (1398.4 - 690.9)  | 3.5 (4.9 - 2.3)    |
| Nigeria    | 11400 (14024 - 9351)  | 15182 (18527 - 10485) | 462467 (580328 - 331655) | 1809 (2534 - 1203) | 22.8 (28 - 18.6)     | 48.6 (60.6 - 30.8)  | 914.7 (1122.1 - 625.2)   | 3.5 (4.9 - 2.3)    |
| Nicaragua  | 1863 (2162 - 1605)    | 552 (806 - 453)       | 14373 (19276 - 12316)    | 232 (311 - 160)    | 104.5 (123.6 - 89.8) | 40.2 (61.7 - 31.7)  | 739.4 (1041.4 - 616.3)   | 12.2 (16.5 - 8.5)  |

|                  |                       |                       |                          |                     |                       |                    |                          |                    |
|------------------|-----------------------|-----------------------|--------------------------|---------------------|-----------------------|--------------------|--------------------------|--------------------|
| Netherlands      | 16045 (20295 - 11282) | 5057 (6017 - 4135)    | 80479 (93054 - 69056)    | 2345 (3368 - 1461)  | 90.2 (113.6 - 63.9)   | 27 (32 - 22.2)     | 452.4 (521.9 - 388.2)    | 13.2 (19 - 8.3)    |
| Norway           | 4701 (5812 - 3694)    | 2070 (2547 - 1746)    | 29847 (36656 - 25864)    | 678 (951 - 442)     | 79.8 (98.1 - 64)      | 31.6 (39 - 26.9)   | 509.7 (621.8 - 441.8)    | 11.7 (16.3 - 7.6)  |
| Nepal            | 8343 (9884 - 6998)    | 3344 (4760 - 2156)    | 90911 (123466 - 63883)   | 1264 (1754 - 826)   | 83.9 (99.3 - 69.6)    | 46.3 (68.5 - 27.2) | 933.8 (1318.2 - 616.3)   | 12.5 (17.1 - 8.1)  |
| New Zealand      | 6654 (7474 - 5936)    | 876 (1085 - 767)      | 17811 (21230 - 15858)    | 967 (1311 - 669)    | 188.5 (211.1 - 168.7) | 24.9 (30.7 - 21.7) | 510.1 (608.5 - 453.2)    | 27.4 (37.3 - 18.9) |
| Oman             | 78 (103 - 56)         | 396 (501 - 304)       | 13223 (17777 - 9758)     | 13 (20 - 8)         | 8.6 (11.1 - 6.6)      | 74.7 (93 - 57.9)   | 1381.5 (1752.2 - 1054.3) | 1.4 (2.1 - 0.9)    |
| Pakistan         | 49431 (58309 - 40826) | 26548 (35560 - 17497) | 659712 (851372 - 459254) | 7473 (10434 - 4924) | 83.4 (97.7 - 68.7)    | 58.3 (79.5 - 37.1) | 1142.6 (1504.7 - 769.4)  | 12.3 (17.1 - 8.1)  |
| Panama           | 1488 (1723 - 1260)    | 442 (700 - 333)       | 8823 (12715 - 7134)      | 225 (313 - 153)     | 102.3 (119.1 - 85.5)  | 36.9 (60.2 - 27.2) | 616 (921.1 - 486.8)      | 15.2 (21 - 10.4)   |
| Peru             | 3591 (4346 - 2885)    | 2049 (2685 - 1796)    | 59477 (79555 - 51109)    | 543 (761 - 354)     | 27.6 (33.2 - 21.8)    | 20.4 (26.5 - 17.8) | 430.1 (566.7 - 375)      | 4 (5.6 - 2.6)      |
| Philippines      | 45683 (51738 - 39683) | 14766 (16879 - 11931) | 446734 (501897 - 385709) | 6633 (9009 - 4566)  | 179 (204.7 - 154.4)   | 61 (72 - 45.8)     | 1361.1 (1541.1 - 1131.6) | 25.3 (34.5 - 17.3) |
| Papua New Guinea | 2694 (3078 - 2314)    | 576 (850 - 371)       | 20225 (29949 - 13306)    | 408 (579 - 271)     | 176.3 (205.8 - 149.6) | 37.6 (53.3 - 25.3) | 923.6 (1346.2 - 605.1)   | 25.8 (36 - 17.3)   |



|              |                       |                       |                            |                    |                       |                       |                          |                    |
|--------------|-----------------------|-----------------------|----------------------------|--------------------|-----------------------|-----------------------|--------------------------|--------------------|
| Poland       | 9042 (10951 - 7391)   | 22084 (25183 - 16923) | 419417 (486521 - 352487)   | 1418 (2027 - 919)  | 22.8 (27.6 - 18.7)    | 58.2 (66.6 - 44)      | 1074.8 (1235.7 - 896.8)  | 3.6 (5.1 - 2.3)    |
| North Korea  | 22156 (26843 - 17463) | 16541 (21771 - 12344) | 412931 (547129 - 304757)   | 3349 (4742 - 2201) | 182.2 (222.5 - 141.7) | 168.2 (220.5 - 127.5) | 3114.6 (4088.4 - 2337.2) | 26.9 (38.6 - 17.5) |
| Portugal     | 17528 (22915 - 13529) | 8498 (9813 - 7161)    | 138941 (159675 - 121857)   | 2531 (3706 - 1646) | 140.8 (182 - 109.6)   | 66.2 (76.5 - 56)      | 1121.9 (1286.7 - 981.7)  | 20.4 (29.5 - 13.3) |
| Paraguay     | 821 (961 - 691)       | 757 (1077 - 645)      | 18861 (25374 - 16397)      | 128 (178 - 85)     | 34.6 (41.5 - 28.8)    | 41.1 (59.9 - 34.4)    | 824.7 (1139.4 - 709.7)   | 5.3 (7.3 - 3.5)    |
| Palestine    | 101 (122 - 80)        | 691 (864 - 552)       | 21749 (27923 - 17034)      | 17 (25 - 11)       | 10.8 (13.1 - 8.6)     | 131.2 (162 - 103.6)   | 2223.4 (2799.9 - 1759.9) | 1.8 (2.6 - 1.1)    |
| Qatar        | 24 (33 - 18)          | 49 (59 - 39)          | 1932 (2291 - 1548)         | 4 (6 - 3)          | 7.9 (10.4 - 5.8)      | 34.4 (42.8 - 24.9)    | 652.6 (786.8 - 497.3)    | 1.3 (2 - 0.8)      |
| Romania      | 6860 (8658 - 5495)    | 23461 (26370 - 18665) | 445887 (495562 - 373575)   | 1072 (1548 - 684)  | 27.3 (34.1 - 21.9)    | 97 (109.4 - 75.8)     | 1749.5 (1947.7 - 1450.1) | 4.3 (6.1 - 2.7)    |
| Russia       | 25886 (32683 - 19928) | 55674 (72420 - 34690) | 1292640 (1651989 - 845938) | 4203 (6081 - 2696) | 16 (20.1 - 12.4)      | 35.3 (45.8 - 22)      | 796.4 (1012.2 - 528.9)   | 2.6 (3.7 - 1.7)    |
| Rwanda       | 465 (558 - 378)       | 3483 (4901 - 2530)    | 97259 (136402 - 70779)     | 78 (113 - 51)      | 13.4 (16.2 - 10.5)    | 167.9 (245.7 - 119)   | 3548.4 (4998.4 - 2577)   | 2.2 (3.2 - 1.4)    |
| Saudi Arabia | 131 (172 - 97)        | 2167 (2703 - 1583)    | 53588 (67479 - 39977)      | 23 (33 - 14)       | 1.6 (2.1 - 1.2)       | 40.9 (50.8 - 29.6)    | 729.7 (929.8 - 535.9)    | 0.3 (0.4 - 0.2)    |

|                       |                    |                    |                          |                 |                       |                      |                          |                    |
|-----------------------|--------------------|--------------------|--------------------------|-----------------|-----------------------|----------------------|--------------------------|--------------------|
| Sudan                 | 780 (990 - 603)    | 7239 (9506 - 5266) | 253758 (332414 - 177828) | 132 (194 - 83)  | 7.7 (9.9 - 6)         | 94.8 (126.5 - 69.9)  | 2054.5 (2695.1 - 1494.5) | 1.3 (2 - 0.8)      |
| Senegal               | 830 (995 - 687)    | 1526 (2032 - 1155) | 42958 (54644 - 33947)    | 134 (191 - 87)  | 21.8 (26 - 17.9)      | 61.2 (85.1 - 44.2)   | 1180.3 (1572.5 - 891.3)  | 3.4 (4.9 - 2.2)    |
| Singapore             | 3595 (4152 - 3078) | 784 (899 - 668)    | 17570 (19773 - 15243)    | 540 (747 - 357) | 179.4 (209.9 - 150.8) | 44.7 (52.2 - 37.7)   | 870.4 (982.2 - 752.7)    | 26.5 (37.1 - 17.4) |
| Solomon Islands       | 217 (247 - 188)    | 128 (188 - 83)     | 3843 (5854 - 2440)       | 33 (45 - 22)    | 188.2 (219 - 159.9)   | 113.9 (158.1 - 76.6) | 2607.2 (3850.3 - 1692.3) | 27.8 (37.9 - 18.9) |
| Sierra Leone          | 494 (592 - 408)    | 1072 (1378 - 862)  | 37225 (46894 - 29621)    | 79 (113 - 52)   | 22.9 (27.3 - 18.7)    | 68.2 (90.4 - 54.5)   | 1484.5 (1913.4 - 1187.6) | 3.6 (5.1 - 2.4)    |
| El Salvador           | 3150 (3655 - 2788) | 569 (878 - 447)    | 16298 (22139 - 13933)    | 467 (628 - 314) | 108 (127.2 - 95.1)    | 20.4 (32.9 - 15.4)   | 458.1 (656.5 - 380.6)    | 15.8 (21.1 - 10.5) |
| Somalia               | 496 (595 - 398)    | 2286 (3580 - 1290) | 59560 (91767 - 33817)    | 83 (117 - 54)   | 13.9 (16.8 - 11.3)    | 99.1 (153.6 - 56.2)  | 1984 (3133.3 - 1114.1)   | 2.3 (3.2 - 1.5)    |
| Serbia                | 2669 (3228 - 2204) | 3710 (4603 - 2678) | 88142 (108101 - 65664)   | 419 (604 - 274) | 26.1 (31.3 - 21.7)    | 37.4 (46.3 - 26.9)   | 842.2 (1035.3 - 630.4)   | 4.1 (5.9 - 2.7)    |
| South Sudan           | 428 (549 - 345)    | 1760 (2439 - 1212) | 49091 (67878 - 34089)    | 72 (104 - 47)   | 13.4 (16.8 - 10.8)    | 89.8 (123.8 - 61.3)  | 1801.7 (2497.9 - 1237.4) | 2.2 (3.2 - 1.5)    |
| Sao Tome and Principe | 14 (17 - 12)       | 55 (65 - 47)       | 1743 (2075 - 1360)       | 2 (3 - 1)       | 22.4 (26.7 - 18.5)    | 95.1 (113.4 - 80.6)  | 2031.8 (2380.1 - 1689.3) | 3.5 (4.9 - 2.3)    |

|            |                       |                       |                          |                     |                       |                       |                          |                    |
|------------|-----------------------|-----------------------|--------------------------|---------------------|-----------------------|-----------------------|--------------------------|--------------------|
| Suriname   | 200 (247 - 164)       | 110 (140 - 96)        | 2981 (3625 - 2643)       | 30 (42 - 20)        | 84 (103.8 - 68.6)     | 48.8 (63.6 - 42.2)    | 1086.9 (1345.2 - 958.9)  | 12.1 (17.3 - 8)    |
| Slovakia   | 1489 (1818 - 1182)    | 1998 (2346 - 1482)    | 42035 (48985 - 32127)    | 233 (327 - 153)     | 27.9 (34 - 22.2)      | 38.2 (44.9 - 28.1)    | 785.6 (917.1 - 601.8)    | 4.4 (6.1 - 2.9)    |
| Slovenia   | 638 (803 - 497)       | 605 (762 - 530)       | 13753 (16614 - 12159)    | 98 (143 - 62)       | 28.8 (36.1 - 22.4)    | 27.2 (34.6 - 23.8)    | 611.2 (740.7 - 539.7)    | 4.4 (6.4 - 2.8)    |
| Sweden     | 20412 (25362 - 16305) | 3939 (4731 - 3219)    | 58511 (68706 - 50305)    | 2922 (4165 - 1906)  | 156.8 (190 - 126.8)   | 26.9 (32.1 - 22)      | 456.9 (535.8 - 397.4)    | 22.8 (32 - 14.9)   |
| Swaziland  | 122 (145 - 100)       | 198 (239 - 151)       | 4983 (5999 - 3868)       | 19 (27 - 12)        | 30.9 (36.5 - 25.3)    | 77.9 (94.5 - 58.3)    | 1448.6 (1754.2 - 1112.2) | 4.7 (6.6 - 3)      |
| Seychelles | 87 (101 - 74)         | 38 (52 - 30)          | 819 (1062 - 671)         | 13 (18 - 9)         | 176.7 (206.4 - 150.2) | 77.4 (105.6 - 61.7)   | 1618.6 (2106.3 - 1321.1) | 26.1 (36.1 - 17.7) |
| Syria      | 483 (603 - 360)       | 6663 (8425 - 5389)    | 240727 (301335 - 189778) | 82 (118 - 51)       | 8.2 (10.4 - 6.2)      | 138.4 (177.5 - 112.2) | 3103.3 (3933.9 - 2490.1) | 1.4 (2 - 0.9)      |
| Chad       | 663 (802 - 525)       | 978 (1247 - 662)      | 30312 (38019 - 20937)    | 106 (152 - 69)      | 21.9 (26.8 - 17.4)    | 43.8 (58.4 - 27.9)    | 886.6 (1132 - 607.4)     | 3.4 (4.9 - 2.2)    |
| Togo       | 415 (497 - 342)       | 846 (1074 - 650)      | 26145 (31784 - 20502)    | 67 (95 - 44)        | 21.8 (26.2 - 17.8)    | 63.8 (85.4 - 47.7)    | 1298.3 (1653.9 - 999.3)  | 3.4 (4.9 - 2.3)    |
| Thailand   | 57695 (65698 - 50032) | 26466 (29292 - 22190) | 568017 (653828 - 482759) | 8743 (11964 - 5932) | 175.2 (200.6 - 150.2) | 101.7 (111.9 - 83.7)  | 1606.7 (1793.9 - 1363)   | 26.1 (35.7 - 17.7) |

|                     |                       |                       |                          |                    |                       |                       |                          |                    |
|---------------------|-----------------------|-----------------------|--------------------------|--------------------|-----------------------|-----------------------|--------------------------|--------------------|
| Tajikistan          | 1218 (1443 - 1038)    | 2242 (2654 - 1538)    | 47121 (55044 - 34020)    | 191 (263 - 125)    | 41.5 (49.3 - 35.2)    | 98.2 (117.1 - 66)     | 1817.5 (2136.7 - 1280.1) | 6.4 (8.8 - 4.2)    |
| Turkmenistan        | 976 (1131 - 844)      | 2724 (3035 - 2511)    | 63356 (70765 - 57589)    | 152 (211 - 101)    | 47.2 (55.5 - 40.3)    | 174.1 (195.4 - 160.2) | 3315.5 (3683.5 - 3033.1) | 7.2 (10 - 4.8)     |
| Timor-Leste         | 462 (531 - 400)       | 163 (215 - 107)       | 6368 (8476 - 4195)       | 70 (96 - 46)       | 184 (212.2 - 156.2)   | 65.1 (88.6 - 38.4)    | 1485.4 (1962.3 - 949.4)  | 26.7 (36.9 - 18)   |
| Tonga               | 82 (95 - 70)          | 28 (35 - 21)          | 639 (835 - 481)          | 12 (17 - 9)        | 166.6 (193.3 - 139.5) | 64.1 (80.6 - 49.5)    | 1195.9 (1541.3 - 907.3)  | 24.7 (33.9 - 17)   |
| Trinidad and Tobago | 694 (845 - 559)       | 339 (415 - 298)       | 8182 (9681 - 7250)       | 104 (146 - 66)     | 87.9 (109.1 - 70.5)   | 46.4 (57.6 - 40.4)    | 973 (1165.1 - 859.9)     | 12.9 (18.2 - 8.3)  |
| Tunisia             | 468 (570 - 356)       | 1974 (2495 - 1572)    | 53955 (67529 - 42615)    | 78 (112 - 50)      | 9.4 (11.5 - 7.4)      | 57.2 (74.4 - 44.2)    | 1040.9 (1302.1 - 835.9)  | 1.6 (2.3 - 1)      |
| Turkey              | 3412 (4234 - 2601)    | 18259 (22494 - 15472) | 521070 (653384 - 431268) | 571 (825 - 363)    | 9.7 (12.2 - 7.4)      | 64.4 (80.8 - 54.1)    | 1331 (1663.1 - 1116.1)   | 1.6 (2.3 - 1)      |
| Taiwan              | 40956 (47851 - 34922) | 7010 (8318 - 5692)    | 171615 (199058 - 143927) | 6096 (8374 - 4189) | 295.9 (345.7 - 252.9) | 57 (68.3 - 45.1)      | 1141.9 (1330.2 - 946.6)  | 43.6 (59.8 - 29.9) |
| Tanzania            | 2591 (3167 - 2146)    | 3015 (3892 - 2281)    | 78908 (99053 - 63916)    | 421 (600 - 278)    | 21.1 (26 - 17.1)      | 38.8 (52 - 26.9)      | 722.2 (932.3 - 550.5)    | 3.3 (4.7 - 2.2)    |
| Uganda              | 1301 (1648 - 1022)    | 4582 (6124 - 2930)    | 119805 (155793 - 80355)  | 218 (311 - 138)    | 14.6 (17.7 - 11.7)    | 86.6 (123.5 - 53)     | 1684.8 (2238.5 - 1077.5) | 2.4 (3.4 - 1.5)    |

|                                  |                          |                       |                             |                       |                       |                       |                          |                    |
|----------------------------------|--------------------------|-----------------------|-----------------------------|-----------------------|-----------------------|-----------------------|--------------------------|--------------------|
| Ukraine                          | 8458 (11815 - 5963)      | 33476 (40061 - 23909) | 672218 (799148 - 501096)    | 1401 (2179 - 831)     | 14.2 (19.4 - 10.1)    | 53.6 (64.3 - 38.3)    | 1067.8 (1266.6 - 803.2)  | 2.3 (3.6 - 1.4)    |
| Uruguay                          | 1802 (2162 - 1517)       | 1109 (1473 - 947)     | 21908 (28082 - 18989)       | 272 (377 - 178)       | 53.7 (63.7 - 45.3)    | 32.7 (43.3 - 27.9)    | 658.5 (842.7 - 572.6)    | 8.1 (11.2 - 5.3)   |
| United States                    | 384820 (451162 - 319108) | 64149 (81233 - 56360) | 1199792 (1439026 - 1074283) | 55288 (78894 - 37617) | 135.7 (158.9 - 112.3) | 21.9 (27.5 - 19.2)    | 435.6 (521.8 - 390.3)    | 19.6 (27.9 - 13.3) |
| Uzbekistan                       | 4711 (5528 - 3914)       | 6626 (7974 - 5606)    | 145327 (170169 - 124012)    | 741 (1037 - 481)      | 39.7 (47.1 - 32.3)    | 69.1 (84.1 - 58.3)    | 1365.9 (1603.6 - 1162.6) | 6.1 (8.6 - 4)      |
| Saint Vincent and the Grenadines | 52 (67 - 41)             | 36 (42 - 30)          | 801 (915 - 675)             | 8 (11 - 5)            | 77.7 (99.7 - 61.5)    | 56 (65.5 - 46.4)      | 1130.2 (1291.2 - 954.6)  | 11.5 (16.7 - 7.5)  |
| Venezuela                        | 11080 (12763 - 9421)     | 2919 (4451 - 2250)    | 73757 (105428 - 60454)      | 1687 (2295 - 1135)    | 108.8 (125.1 - 91.3)  | 35.8 (57.8 - 26.5)    | 691.3 (1019.7 - 546.8)   | 16.2 (22.2 - 11.1) |
| Vietnam                          | 81657 (91463 - 73154)    | 55003 (67359 - 43896) | 1197186 (1433140 - 976733)  | 11326 (15096 - 7795)  | 198.2 (223.1 - 176.1) | 140.2 (172.6 - 111.4) | 2857.1 (3437.8 - 2317.3) | 27.1 (36.1 - 18.8) |
| Vanuatu                          | 115 (132 - 100)          | 64 (91 - 41)          | 1742 (2588 - 1109)          | 17 (24 - 11)          | 180.8 (208 - 155.5)   | 103.9 (145.2 - 69.5)  | 2325.8 (3400.9 - 1506)   | 26.7 (36.5 - 17.7) |
| Samoa                            | 131 (152 - 109)          | 63 (86 - 45)          | 1684 (2330 - 1179)          | 20 (27 - 13)          | 173.8 (202 - 144.8)   | 92.3 (129.2 - 67.5)   | 1944.7 (2690.4 - 1379.3) | 25.8 (35.3 - 17.2) |
| Anhui                            | 22597 (28569 - 18101)    | 51231 (59081 - 43721) | 1107740 (1281874 - 945763)  | 3430 (5019 - 2194)    | 63.6 (82.3 - 50.3)    | 168.9 (194.9 - 144.7) | 2948.2 (3398.5 - 2524.9) | 9.5 (14 - 6.1)     |

|              |                         |                       |                             |                       |                       |                       |                          |                    |
|--------------|-------------------------|-----------------------|-----------------------------|-----------------------|-----------------------|-----------------------|--------------------------|--------------------|
| Sonora       | 1070 (1234 - 920)       | 297 (343 - 253)       | 7213 (8204 - 6228)          | 162 (219 - 108)       | 107.8 (126 - 92.1)    | 37.9 (44 - 32)        | 695 (795.3 - 595.2)      | 16 (21.9 - 10.6)   |
| Beijing      | 12050 (13891 - 10307)   | 6776 (8108 - 5335)    | 150581 (180697 - 120853)    | 1799 (2450 - 1191)    | 140.1 (161.8 - 119.6) | 88.8 (105.6 - 69)     | 1656.4 (1986.8 - 1328.2) | 20.5 (27.8 - 13.6) |
| Tabasco      | 743 (850 - 635)         | 218 (252 - 193)       | 5256 (5934 - 4638)          | 113 (154 - 77)        | 107.9 (125.7 - 91.5)  | 38.7 (45.1 - 34)      | 698.2 (791.9 - 616.1)    | 16 (21.7 - 10.9)   |
| Guangdong    | 76930 (93924 - 62970)   | 44798 (52656 - 36152) | 860609 (1017601 - 705053)   | 11336 (15886 - 7419)  | 186.2 (230.9 - 150.9) | 118.5 (139.3 - 95.3)  | 2032.6 (2409.5 - 1652.5) | 27.2 (38.3 - 17.8) |
| Guangxi      | 30849 (37519 - 25908)   | 31205 (36670 - 25680) | 679354 (799977 - 569657)    | 4618 (6382 - 3033)    | 114.2 (140.3 - 95.2)  | 123 (144.6 - 99.8)    | 2402.7 (2824.6 - 2008.1) | 16.9 (23.3 - 11)   |
| Chongqing    | 22303 (25633 - 19306)   | 15003 (17492 - 12894) | 320709 (380896 - 269801)    | 3353 (4604 - 2235)    | 191.6 (223 - 164.3)   | 147.9 (172.8 - 128.6) | 2674.8 (3135.5 - 2279.5) | 28.4 (38.8 - 19)   |
| Guizhou      | 27987 (35227 - 21830)   | 35766 (41296 - 30318) | 831567 (976589 - 700252)    | 4207 (6103 - 2736)    | 150.5 (193 - 115.5)   | 209.9 (240.5 - 179.2) | 4074.1 (4764 - 3441.1)   | 22.3 (32.8 - 14.3) |
| Hebei        | 77962 (98765 - 63582)   | 54137 (64387 - 44394) | 1184993 (1417865 - 953541)  | 11630 (16523 - 7386)  | 188.5 (241.6 - 151.6) | 146.3 (173.9 - 120.8) | 2718.5 (3232.6 - 2205)   | 27.8 (40 - 17.7)   |
| Heilongjiang | 56697 (69226 - 46615)   | 31726 (37733 - 26210) | 876959 (1053419 - 723231)   | 8565 (11996 - 5702)   | 302.1 (380.3 - 242.1) | 184.8 (218.4 - 152.6) | 3942.9 (4676.9 - 3280.5) | 44.7 (63.4 - 29.4) |
| Henan        | 103348 (127782 - 84286) | 82968 (97090 - 70498) | 1903252 (2226901 - 1606026) | 15557 (22295 - 10021) | 181.9 (228.8 - 148.6) | 159.8 (188 - 136.5)   | 3124.6 (3666.1 - 2639.4) | 27.1 (39.1 - 17.3) |

|          |                         |                        |                             |                       |                       |                       |                          |                    |
|----------|-------------------------|------------------------|-----------------------------|-----------------------|-----------------------|-----------------------|--------------------------|--------------------|
| Hubei    | 63095 (74186 - 52197)   | 53761 (63016 - 46470)  | 1228529 (1449331 - 1050044) | 9394 (13145 - 6337)   | 184.7 (216.9 - 152.2) | 182.9 (213.4 - 159.1) | 3390.4 (3969.5 - 2929.5) | 27.1 (38.2 - 18.5) |
| Hunan    | 103240 (125070 - 86100) | 57842 (68480 - 48887)  | 1245751 (1491642 - 1037611) | 15554 (21947 - 10306) | 257.9 (309 - 213.9)   | 163.7 (193.2 - 139.8) | 3004.4 (3584.3 - 2521.6) | 38.4 (53.6 - 25.4) |
| Jiangxi  | 19818 (25108 - 16412)   | 20813 (28057 - 16233)  | 500685 (645725 - 398092)    | 2974 (4289 - 1971)    | 90 (116.3 - 74.6)     | 105 (144.3 - 81.4)    | 2040.9 (2684.7 - 1609.6) | 13.3 (19.3 - 8.9)  |
| Jilin    | 36074 (42271 - 29877)   | 24798 (28966 - 20316)  | 611893 (726674 - 501571)    | 5436 (7570 - 3580)    | 251.8 (297.6 - 204.4) | 192.9 (224.1 - 158.1) | 3844.3 (4495.7 - 3172.2) | 37.4 (52.6 - 24.4) |
| Shaanxi  | 43257 (52709 - 35760)   | 30154 (35388 - 25467)  | 711473 (847055 - 591617)    | 6532 (9277 - 4249)    | 217.9 (269.1 - 179.4) | 174.8 (203.9 - 150.4) | 3288.5 (3876.4 - 2762.9) | 32.4 (46.2 - 21)   |
| Shandong | 84485 (98801 - 70418)   | 70662 (80520 - 59423)  | 1419711 (1639341 - 1221147) | 12653 (17386 - 8293)  | 140.2 (165.3 - 116.1) | 131.4 (149.2 - 109.8) | 2301.3 (2645.5 - 1964.3) | 20.8 (28.5 - 13.7) |
| Shanghai | 16876 (21039 - 13231)   | 10238 (12457 - 7176)   | 166942 (203460 - 126883)    | 2503 (3587 - 1622)    | 125.8 (157.4 - 97.8)  | 86.1 (105 - 59.1)     | 1269.7 (1539.8 - 951.5)  | 18.5 (26.6 - 12)   |
| Shanxi   | 46165 (53646 - 37718)   | 27508 (32529 - 22805)  | 636848 (764044 - 523934)    | 6884 (9663 - 4635)    | 253.6 (296.4 - 204.3) | 170.4 (200.6 - 142)   | 3244.2 (3859.6 - 2674.5) | 37.3 (52 - 25.3)   |
| Sichuan  | 87838 (103724 - 75177)  | 96997 (112547 - 80168) | 2091365 (2468275 - 1740376) | 13176 (18426 - 8730)  | 123.9 (147.3 - 104.5) | 159 (183.9 - 130.8)   | 2789.2 (3257.5 - 2312.8) | 18.3 (25.7 - 12.3) |
| Tlaxcala | 462 (538 - 404)         | 135 (156 - 115)        | 3038 (3471 - 2653)          | 70 (95 - 47)          | 110.8 (130.5 - 96.3)  | 36.3 (42.3 - 30.9)    | 661.4 (751.2 - 575.9)    | 16.5 (22.6 - 11.3) |

|                                 |                       |                       |                          |                    |                       |                       |                          |                    |
|---------------------------------|-----------------------|-----------------------|--------------------------|--------------------|-----------------------|-----------------------|--------------------------|--------------------|
| Fujian                          | 18170 (22054 - 14582) | 22453 (25849 - 19265) | 452148 (520785 - 386695) | 2724 (3916 - 1735) | 99.5 (120.8 - 80.3)   | 143.3 (163.9 - 122.8) | 2407.5 (2761.9 - 2069.9) | 14.7 (21.1 - 9.4)  |
| Veracruz de Ignacio de la Llave | 3892 (4432 - 3340)    | 1355 (1544 - 1153)    | 29938 (33981 - 26143)    | 590 (814 - 396)    | 105.1 (120.5 - 87.2)  | 41.8 (47.7 - 35.5)    | 755.1 (858.5 - 656.2)    | 15.7 (21.7 - 10.4) |
| Gansu                           | 23478 (27897 - 19509) | 12448 (14415 - 10731) | 325625 (381125 - 277516) | 3556 (5059 - 2368) | 194.8 (236.3 - 161.2) | 121.9 (139.6 - 106.3) | 2377.5 (2747.4 - 2057.4) | 28.9 (40.8 - 19.2) |
| North East England              | 3479 (4678 - 2423)    | 1346 (1701 - 1165)    | 22324 (27906 - 19721)    | 502 (753 - 297)    | 99.6 (132.3 - 70.9)   | 36.3 (45.9 - 31.5)    | 643.3 (801.5 - 568.4)    | 14.5 (21.6 - 8.6)  |
| North West England              | 9232 (12308 - 6817)   | 3510 (4247 - 3008)    | 56838 (67618 - 50453)    | 1333 (1981 - 844)  | 99.4 (131.1 - 73.8)   | 34.6 (41.7 - 29.9)    | 618.4 (732 - 549.3)      | 14.5 (21.3 - 9.1)  |
| Yorkshire and the Humber        | 6668 (8707 - 4916)    | 2414 (3021 - 2020)    | 38067 (46378 - 33399)    | 958 (1437 - 599)   | 99.2 (128.1 - 74.2)   | 32.8 (40.8 - 27.7)    | 569.9 (685.4 - 504.9)    | 14.4 (21.5 - 9)    |
| East Midlands                   | 6364 (10289 - 4156)   | 1844 (2256 - 1564)    | 29228 (35179 - 25726)    | 917 (1572 - 519)   | 116.6 (182.6 - 78.4)  | 31.4 (38.4 - 26.8)    | 542.9 (651.7 - 479.9)    | 17 (28.7 - 9.7)    |
| West Midlands                   | 7424 (9946 - 5293)    | 2394 (2988 - 2020)    | 38836 (46518 - 33762)    | 1071 (1593 - 646)  | 107 (142.6 - 76.8)    | 32.4 (40.2 - 27.5)    | 563.7 (672 - 491)        | 15.6 (22.9 - 9.5)  |
| East of England                 | 7571 (9959 - 5388)    | 2188 (2694 - 1833)    | 32704 (39045 - 28566)    | 1096 (1603 - 657)  | 109.4 (141.4 - 79.4)  | 28.5 (34.9 - 24.1)    | 469.3 (558 - 413.5)      | 16 (23.3 - 9.8)    |
| Greater London                  | 13101 (15090 - 10877) | 2877 (3487 - 2332)    | 47419 (56322 - 40581)    | 1881 (2576 - 1292) | 150.3 (173 - 126.4)   | 30.5 (36.7 - 25.1)    | 560.2 (663.7 - 485.9)    | 21.8 (29.9 - 14.9) |



|                    |                       |                       |                            |                     |                       |                      |                        |                    |
|--------------------|-----------------------|-----------------------|----------------------------|---------------------|-----------------------|----------------------|------------------------|--------------------|
| South East England | 12198 (17695 - 8679)  | 3414 (4171 - 2850)    | 49229 (59027 - 42796)      | 1757 (2830 - 1086)  | 112.2 (156.7 - 80.5)  | 27.8 (34.1 - 23.3)   | 456.5 (543.6 - 399.3)  | 16.4 (25.3 - 10.1) |
| South West England | 7456 (10153 - 5437)   | 2425 (2993 - 2028)    | 34090 (41110 - 29903)      | 1064 (1547 - 641)   | 103.7 (134.3 - 77.3)  | 28.8 (35.4 - 24.4)   | 471.2 (567 - 413.6)    | 15.1 (21.8 - 9.2)  |
| Wales              | 4409 (5835 - 3328)    | 1468 (1774 - 1216)    | 22951 (27166 - 19773)      | 632 (926 - 404)     | 106.6 (138 - 82.1)    | 32.4 (39 - 27.1)     | 560.1 (661.3 - 484.6)  | 15.5 (22.4 - 9.8)  |
| Hainan             | 8171 (9825 - 6768)    | 3985 (4848 - 3267)    | 86637 (107331 - 71132)     | 1215 (1704 - 792)   | 194.7 (235 - 160.6)   | 101.5 (122.9 - 83.8) | 1941 (2372.7 - 1593.9) | 28.7 (40.3 - 18.7) |
| Zacatecas          | 785 (899 - 671)       | 234 (274 - 208)       | 5119 (5823 - 4530)         | 118 (160 - 81)      | 108.2 (124.8 - 91.3)  | 34.4 (40.5 - 30.5)   | 642.5 (734 - 567.9)    | 16.1 (21.9 - 11)   |
| Tamaulipas         | 1471 (1723 - 1269)    | 485 (564 - 418)       | 10690 (12241 - 9214)       | 222 (311 - 147)     | 114.2 (135.7 - 98.4)  | 43.8 (51.1 - 37.4)   | 794.5 (909.2 - 684.1)  | 16.9 (23.7 - 11.2) |
| Jiangsu            | 41562 (50197 - 33694) | 58400 (66877 - 50708) | 1061690 (1220126 - 903228) | 6177 (8558 - 4098)  | 80.5 (98.1 - 65.1)    | 130 (149.4 - 113.1)  | 2053.4 (2350 - 1760.7) | 11.8 (16.4 - 7.8)  |
| Yucatán            | 972 (1122 - 844)      | 293 (343 - 260)       | 6229 (7134 - 5528)         | 148 (202 - 98)      | 109.6 (126.7 - 94.9)  | 36.9 (43 - 32.5)     | 665.3 (758.8 - 591.4)  | 16.5 (22.5 - 11)   |
| Liaoning           | 52779 (64529 - 41747) | 31734 (38119 - 26019) | 721473 (866629 - 588912)   | 7903 (11213 - 5017) | 192.2 (239.5 - 150.2) | 127 (152.7 - 104.5)  | 2439 (2901.6 - 1992.4) | 28.5 (40.7 - 18)   |
| Aguascalientes     | 413 (462 - 358)       | 114 (130 - 97)        | 2551 (2869 - 2228)         | 62 (85 - 42)        | 113 (127.8 - 96.5)    | 35.9 (41.3 - 30.2)   | 637.2 (720.3 - 556.9)  | 16.7 (22.6 - 11.4) |

|                     |                       |                       |                          |                    |                      |                       |                          |                    |
|---------------------|-----------------------|-----------------------|--------------------------|--------------------|----------------------|-----------------------|--------------------------|--------------------|
| Baja California     | 920 (1052 - 795)      | 298 (345 - 261)       | 7602 (8800 - 6712)       | 141 (191 - 95)     | 110.5 (126.6 - 93.6) | 45.9 (53.7 - 40.1)    | 854.9 (987.7 - 752.2)    | 16.5 (22.5 - 11.2) |
| Baja California Sur | 157 (179 - 137)       | 42 (49 - 37)          | 1026 (1180 - 893)        | 24 (32 - 16)       | 106.7 (124.5 - 91.5) | 35.3 (40.9 - 30)      | 642.3 (736.8 - 554)      | 15.7 (21.7 - 10.4) |
| Campeche            | 308 (357 - 263)       | 84 (97 - 72)          | 1971 (2269 - 1713)       | 47 (64 - 32)       | 112 (132.6 - 94.2)   | 36.1 (41.9 - 30.7)    | 660.7 (757.7 - 572)      | 16.6 (23 - 11.3)   |
| Coahuila            | 1158 (1337 - 964)     | 400 (459 - 345)       | 9365 (10549 - 8105)      | 175 (239 - 115)    | 110.6 (130.2 - 90.4) | 44.8 (51.7 - 38.4)    | 843.6 (957.4 - 731)      | 16.5 (22.8 - 10.6) |
| Colima              | 252 (290 - 215)       | 89 (100 - 75)         | 1925 (2174 - 1687)       | 38 (53 - 26)       | 107 (123.8 - 89.6)   | 43.1 (48.6 - 35.8)    | 770.7 (871.5 - 666.7)    | 15.8 (21.9 - 10.9) |
| Inner Mongolia      | 19822 (23883 - 16758) | 20211 (23173 - 17293) | 547364 (635100 - 466516) | 2992 (4166 - 1987) | 174 (211.6 - 144.1)  | 198.4 (225.9 - 169.6) | 4047.1 (4647.5 - 3466.7) | 25.8 (36.2 - 17.1) |
| Chiapas             | 1539 (1732 - 1366)    | 398 (471 - 347)       | 11151 (12891 - 9718)     | 235 (319 - 161)    | 114.1 (130.7 - 99.7) | 35.3 (42.4 - 30.7)    | 690.9 (801.1 - 603.3)    | 17 (23.4 - 11.6)   |
| Chihuahua           | 1357 (1567 - 1164)    | 436 (509 - 374)       | 11379 (13056 - 9736)     | 207 (286 - 141)    | 105.2 (122.3 - 89.5) | 44.5 (52.3 - 37.3)    | 846 (978.6 - 725.2)      | 15.7 (21.8 - 10.6) |
| Distrito Federal    | 5990 (6934 - 5204)    | 1735 (1991 - 1482)    | 37689 (43241 - 32975)    | 906 (1238 - 614)   | 108.1 (126.1 - 93.6) | 37 (43.2 - 31.3)      | 668 (762.2 - 578)        | 16.1 (21.8 - 11)   |
| Durango             | 777 (909 - 651)       | 237 (273 - 204)       | 5747 (6599 - 5062)       | 117 (165 - 78)     | 109.3 (128.4 - 90.5) | 37.9 (43.9 - 32.5)    | 729.9 (841.3 - 641.8)    | 16.2 (22.9 - 10.7) |

|                     |                    |                    |                       |                  |                      |                    |                       |                    |
|---------------------|--------------------|--------------------|-----------------------|------------------|----------------------|--------------------|-----------------------|--------------------|
| Guanajuato          | 2345 (2773 - 2028) | 666 (793 - 575)    | 14674 (17085 - 12930) | 354 (486 - 240)  | 108.8 (131.1 - 93.2) | 33.4 (40 - 28.8)   | 616.4 (718.5 - 544.7) | 16.2 (22.5 - 10.9) |
| Guerrero            | 1522 (1824 - 1299) | 521 (595 - 448)    | 12648 (14242 - 11014) | 231 (326 - 154)  | 102.5 (126.3 - 87.2) | 40.2 (46.3 - 34.4) | 760.2 (854.3 - 659.9) | 15.3 (21.6 - 10.3) |
| Hidalgo             | 1130 (1300 - 956)  | 388 (455 - 338)    | 8866 (10066 - 7769)   | 171 (231 - 114)  | 106.4 (123.7 - 88.4) | 40.7 (48.5 - 35.3) | 769 (879.5 - 672.6)   | 15.9 (21.6 - 10.5) |
| Jalisco             | 3563 (4015 - 3110) | 1066 (1237 - 926)  | 23322 (26526 - 20453) | 536 (738 - 358)  | 109.1 (123.6 - 95.5) | 36.3 (42.6 - 31.4) | 668.2 (761.3 - 586.1) | 16.2 (22.2 - 10.8) |
| México              | 5732 (6690 - 4986) | 1564 (1802 - 1358) | 37065 (42491 - 33016) | 884 (1240 - 590) | 104.9 (122.3 - 90.9) | 34.8 (40.2 - 29.7) | 632.1 (723.5 - 555.7) | 15.9 (21.9 - 10.6) |
| Michoacán de Ocampo | 2159 (2521 - 1808) | 602 (697 - 526)    | 13450 (15396 - 11803) | 326 (453 - 212)  | 106.3 (125.1 - 86.8) | 32.4 (37.9 - 28.2) | 600.6 (685.8 - 528.5) | 15.8 (22.2 - 10.2) |
| Morelos             | 772 (888 - 676)    | 236 (268 - 201)    | 5252 (5927 - 4534)    | 117 (159 - 80)   | 106.3 (123.7 - 92.1) | 37.9 (43.2 - 32.1) | 691.2 (775.4 - 593.9) | 15.8 (21.6 - 10.8) |
| Nayarit             | 507 (595 - 433)    | 163 (187 - 141)    | 3651 (4182 - 3190)    | 76 (104 - 51)    | 109.1 (128.7 - 92.8) | 41 (47.4 - 35.3)   | 737.4 (850.3 - 641.1) | 16.2 (22 - 10.8)   |
| Nuevo León          | 1891 (2257 - 1553) | 632 (733 - 550)    | 13979 (15896 - 12315) | 289 (408 - 189)  | 102 (124.7 - 82)     | 41.2 (48.4 - 35.7) | 733.6 (840.6 - 647.2) | 15.3 (22 - 9.9)    |
| Oaxaca              | 1825 (2111 - 1582) | 505 (600 - 448)    | 12427 (14758 - 11038) | 277 (381 - 187)  | 106.3 (124.1 - 91.3) | 34.9 (41.9 - 30.9) | 664.6 (784.9 - 592.2) | 15.9 (21.8 - 10.7) |

|                  |                       |                    |                          |                    |                       |                       |                          |                    |
|------------------|-----------------------|--------------------|--------------------------|--------------------|-----------------------|-----------------------|--------------------------|--------------------|
| Puebla           | 2508 (2935 - 2164)    | 670 (828 - 595)    | 16665 (19813 - 14872)    | 382 (522 - 253)    | 103.6 (122.8 - 88.9)  | 31.7 (39.3 - 27.9)    | 612.3 (741.6 - 547)      | 15.5 (21.3 - 10.2) |
| Querétaro        | 570 (665 - 483)       | 182 (211 - 161)    | 4225 (4839 - 3786)       | 87 (121 - 57)      | 106.9 (126.7 - 88.6)  | 39 (45.6 - 34.5)      | 713.8 (820.5 - 638.1)    | 15.9 (22.4 - 10.5) |
| Quintana Roo     | 214 (247 - 186)       | 40 (46 - 35)       | 1166 (1341 - 1036)       | 33 (45 - 22)       | 108.5 (126.2 - 92.4)  | 29.3 (33.7 - 25.2)    | 517.8 (591.7 - 457.9)    | 16.1 (21.8 - 11)   |
| San Luis Potosí  | 1186 (1365 - 1000)    | 399 (463 - 342)    | 8520 (9569 - 7366)       | 180 (246 - 121)    | 105.3 (122.5 - 87.3)  | 39.6 (46.2 - 33.9)    | 707.6 (802.8 - 615.3)    | 15.7 (21.7 - 10.6) |
| Sinaloa          | 1333 (1558 - 1126)    | 352 (402 - 300)    | 7612 (8576 - 6575)       | 201 (271 - 135)    | 105.6 (124.5 - 87.8)  | 33.5 (38.7 - 28.3)    | 578 (654.9 - 501)        | 15.6 (21.2 - 10.5) |
| Ningxia          | 4443 (5147 - 3722)    | 2244 (2669 - 1863) | 57659 (68330 - 47591)    | 674 (927 - 451)    | 203.1 (235.1 - 167.1) | 120.6 (141.8 - 99)    | 2268.4 (2691.4 - 1871.2) | 30.2 (41.5 - 20.2) |
| Northern Ireland | 2083 (3002 - 1490)    | 642 (813 - 560)    | 10781 (13282 - 9518)     | 300 (457 - 182)    | 113 (158.2 - 82.4)    | 33 (41.7 - 28.9)      | 593.1 (723.9 - 524.7)    | 16.4 (24.7 - 10)   |
| Qinghai          | 3987 (4754 - 3152)    | 2689 (3175 - 2304) | 76833 (92831 - 64326)    | 609 (868 - 396)    | 194.1 (235.7 - 151.6) | 153 (178.1 - 131.9)   | 3056.3 (3612.4 - 2623.2) | 29 (42.3 - 18.7)   |
| Scotland         | 7402 (9274 - 5799)    | 2985 (3715 - 2515) | 48669 (59228 - 42460)    | 1070 (1543 - 696)  | 110.1 (136.5 - 87.1)  | 41.2 (51.2 - 35)      | 725.5 (874.7 - 633.1)    | 16.1 (23 - 10.5)   |
| Tianjin          | 17942 (21270 - 15418) | 8374 (9868 - 6542) | 182400 (217319 - 147305) | 2694 (3743 - 1822) | 265.1 (316.3 - 224.8) | 138.2 (163.3 - 106.7) | 2567.8 (3037.6 - 2046.2) | 39.4 (54.8 - 26.6) |

|              |                       |                       |                          |                     |                       |                       |                          |                    |
|--------------|-----------------------|-----------------------|--------------------------|---------------------|-----------------------|-----------------------|--------------------------|--------------------|
| Tibet        | 3128 (3677 - 2675)    | 3216 (3802 - 2761)    | 85077 (101409 - 72562)   | 466 (645 - 311)     | 254.9 (301.4 - 215.2) | 273 (319.7 - 235.9)   | 5909.5 (6988.6 - 5070.4) | 37.4 (51.7 - 25)   |
| Xinjiang     | 19050 (23524 - 15652) | 10420 (12603 - 8702)  | 287397 (351860 - 240224) | 2873 (4011 - 1870)  | 238.9 (299 - 191.6)   | 134.8 (162.5 - 112.8) | 2981.1 (3626.2 - 2489.9) | 35.6 (49.9 - 23)   |
| Yunnan       | 56760 (68600 - 46867) | 23037 (27179 - 19640) | 540698 (647083 - 453808) | 8535 (11973 - 5556) | 256.8 (311 - 211.6)   | 119.2 (139.5 - 101.4) | 2266.1 (2685.7 - 1921.1) | 38.1 (53.1 - 24.9) |
| Zhejiang     | 64529 (77750 - 52956) | 40270 (46206 - 33110) | 697731 (807266 - 587847) | 9528 (13410 - 6326) | 200.2 (240.4 - 164.5) | 143.3 (163.4 - 117)   | 2208.7 (2539.4 - 1851.9) | 29.3 (41.3 - 19.5) |
| Yemen        | 406 (515 - 311)       | 4755 (7163 - 3041)    | 183090 (265820 - 115049) | 69 (100 - 43)       | 7.8 (9.9 - 6)         | 111 (172.8 - 71.9)    | 2490.4 (3907 - 1534.3)   | 1.3 (1.9 - 0.8)    |
| South Africa | 6966 (8094 - 5801)    | 11645 (13602 - 9411)  | 282872 (340088 - 213738) | 1084 (1504 - 726)   | 30.3 (35.4 - 25.2)    | 65.4 (77.4 - 54)      | 1288.5 (1516.5 - 1013.4) | 4.6 (6.4 - 3.1)    |
| Zambia       | 600 (763 - 475)       | 1386 (1742 - 1049)    | 35646 (44103 - 28451)    | 100 (146 - 66)      | 14.8 (19.2 - 11.7)    | 58.8 (77.2 - 41.1)    | 1073.4 (1351 - 820.6)    | 2.4 (3.6 - 1.6)    |
| Zimbabwe     | 1495 (1773 - 1231)    | 1841 (2186 - 1575)    | 52951 (64807 - 45283)    | 231 (321 - 151)     | 30.3 (35.9 - 24.7)    | 50.2 (59.3 - 41.9)    | 1074.5 (1272.8 - 913.8)  | 4.5 (6.3 - 2.9)    |

Supplementary Table 4. Country-specific burden of haemorrhagic stroke in 2013 (rates per 100,000 person-years and absolute numbers with 95% uncertainty intervals)

| Country              | Absolute numbers (95% UI) |                       |                          |                    | Rates (95% UI)    |                      |                       |                          |
|----------------------|---------------------------|-----------------------|--------------------------|--------------------|-------------------|----------------------|-----------------------|--------------------------|
|                      | Prevalence                | Deaths                | DALYs                    | YLDs               | Prevalence        | Deaths               | DALYs                 | YLDs                     |
| Afghanistan          | 1019 (1299 - 778)         | 14144 (23875 - 8693)  | 413158 (700287 - 244179) | 173 (254 - 107)    | 1.2 (1.8 - 0.8)   | 7.2 (9 - 5.5)        | 152.1 (245.2 - 98.7)  | 3282.7 (5528.6 - 2017.3) |
| Angola               | 2022 (2366 - 1692)        | 6215 (9353 - 4254)    | 181841 (272666 - 126699) | 330 (462 - 213)    | 3.1 (4.4 - 2)     | 19.8 (23.6 - 16.5)   | 95.3 (142.1 - 63.7)   | 1954.2 (2973.6 - 1329.8) |
| Albania              | 1129 (1431 - 912)         | 5021 (5964 - 4226)    | 72539 (87118 - 59563)    | 174 (250 - 113)    | 5 (7.1 - 3.3)     | 32.4 (40.8 - 26.2)   | 153.3 (181.2 - 129.9) | 2124.4 (2550.7 - 1749.7) |
| Andorra              | 135 (190 - 95)            | 26 (37 - 17)          | 286 (380 - 195)          | 19 (29 - 12)       | 15.4 (22.9 - 9.5) | 105.2 (143.8 - 75.7) | 16.1 (22.3 - 10.4)    | 210.3 (278.6 - 146.2)    |
| United Arab Emirates | 403 (556 - 265)           | 515 (750 - 354)       | 20140 (29630 - 13772)    | 68 (107 - 39)      | 1.3 (1.9 - 0.8)   | 7.5 (9.8 - 5.7)      | 45.2 (67.5 - 31.2)    | 734.8 (1088.3 - 510.3)   |
| Argentina            | 26129 (31157 - 21884)     | 14457 (16998 - 11224) | 279448 (321709 - 225825) | 3944 (5466 - 2652) | 9.2 (12.7 - 6.2)  | 60.6 (72.6 - 50.9)   | 32 (37.4 - 25.1)      | 650.6 (748.3 - 527.4)    |
| Armenia              | 1314 (1555 - 1051)        | 1280 (1565 - 1075)    | 22813 (27111 - 19454)    | 202 (285 - 131)    | 6.2 (8.8 - 4)     | 40.5 (47.9 - 32.3)   | 38.5 (46.8 - 32.4)    | 702.3 (832.6 - 600.6)    |
| Antigua and Barbuda  | 65 (86 - 49)              | 28 (35 - 22)          | 573 (722 - 445)          | 10 (14 - 6)        | 12.2 (18.4 - 7.6) | 82.8 (110.8 - 61.5)  | 38.9 (48.7 - 30.8)    | 722.9 (911 - 566.3)      |

|              |                        |                        |                             |                      |                   |                      |                     |                          |
|--------------|------------------------|------------------------|-----------------------------|----------------------|-------------------|----------------------|---------------------|--------------------------|
| Australia    | 28509 (33519 - 24205)  | 4722 (5714 - 3352)     | 66628 (77566 - 50268)       | 4162 (5612 - 2825)   | 13.8 (18.5 - 9.3) | 93.6 (108.9 - 80.1)  | 13.2 (15.8 - 9.5)   | 211.1 (245 - 160.8)      |
| Austria      | 15031 (20285 - 9895)   | 2757 (3683 - 2192)     | 36134 (45325 - 29889)       | 2159 (3078 - 1241)   | 15.7 (22.3 - 9.2) | 107.4 (143.7 - 74.8) | 16.4 (21.6 - 13.3)  | 253.3 (310.1 - 208.6)    |
| Azerbaijan   | 3442 (4049 - 2869)     | 5425 (6336 - 4248)     | 106531 (125554 - 85085)     | 537 (760 - 359)      | 6.4 (9 - 4.3)     | 41.6 (49.3 - 35.1)   | 88.8 (104.1 - 68.8) | 1482.7 (1745.2 - 1171.3) |
| Burundi      | 773 (961 - 609)        | 3038 (4632 - 2216)     | 74209 (107512 - 56574)      | 130 (189 - 82)       | 2.4 (3.4 - 1.5)   | 14.3 (17.5 - 11.6)   | 103 (167.2 - 72.5)  | 1949.5 (2939.2 - 1436.4) |
| Belgium      | 17725 (23963 - 13562)  | 4653 (5638 - 3580)     | 58507 (68927 - 47771)       | 2533 (3744 - 1623)   | 14.8 (21.5 - 9.7) | 101.6 (137.9 - 79.2) | 20.8 (25.1 - 16.3)  | 317.2 (371.4 - 260.6)    |
| Benin        | 1153 (1388 - 940)      | 1932 (3387 - 1212)     | 53788 (83508 - 36858)       | 186 (266 - 121)      | 3.3 (4.7 - 2.2)   | 21 (25.6 - 17.1)     | 55.4 (107.3 - 32.1) | 1110.2 (1927 - 701.8)    |
| Burkina Faso | 1662 (1962 - 1338)     | 1701 (2940 - 1135)     | 47586 (74079 - 34081)       | 271 (382 - 173)      | 3.2 (4.5 - 2)     | 20.2 (24.6 - 16.3)   | 33.7 (62.2 - 21.2)  | 688 (1196.2 - 460)       |
| Bangladesh   | 90145 (102772 - 75402) | 94304 (126815 - 62328) | 2036122 (2679185 - 1345716) | 13573 (18497 - 8851) | 12.6 (17.2 - 8.3) | 85.2 (96.4 - 70.7)   | 119 (162.5 - 78.9)  | 2148.1 (2858.3 - 1417.3) |
| Bulgaria     | 2984 (3712 - 2334)     | 7463 (11182 - 5549)    | 127057 (178397 - 98566)     | 459 (649 - 292)      | 4.3 (6.2 - 2.8)   | 27.7 (34.2 - 21.7)   | 56.4 (83.2 - 42.4)  | 1057.5 (1461.6 - 829.8)  |
| Bahrain      | 71 (95 - 51)           | 81 (101 - 64)          | 2388 (2981 - 1889)          | 12 (18 - 7)          | 1.2 (1.9 - 0.8)   | 7.2 (9.6 - 5.4)      | 17.4 (22.2 - 13.6)  | 310.4 (389.3 - 248.8)    |

|                        |                       |                       |                             |                     |                    |                       |                     |                         |
|------------------------|-----------------------|-----------------------|-----------------------------|---------------------|--------------------|-----------------------|---------------------|-------------------------|
| The Bahamas            | 296 (392 - 231)       | 128 (160 - 96)        | 2772 (3498 - 2068)          | 44 (65 - 28)        | 12.6 (19 - 8.1)    | 86 (115.3 - 65.1)     | 41.4 (51.5 - 31)    | 786.4 (983.4 - 592.2)   |
| Bosnia and Herzegovina | 1436 (1824 - 1084)    | 1402 (2654 - 762)     | 25112 (43629 - 15315)       | 222 (332 - 140)     | 4.4 (6.6 - 2.8)    | 28.5 (35.9 - 21.9)    | 26.4 (49.7 - 14.5)  | 479.9 (813.4 - 299.7)   |
| Belarus                | 782 (1003 - 622)      | 5634 (7000 - 4502)    | 124414 (153556 - 99449)     | 132 (193 - 84)      | 1.1 (1.6 - 0.7)    | 6.4 (8.1 - 5.1)       | 41.4 (51.5 - 33.1)  | 957.4 (1182.8 - 764.8)  |
| Belize                 | 152 (186 - 124)       | 71 (87 - 55)          | 1766 (2208 - 1386)          | 23 (33 - 15)        | 12.2 (17.7 - 8)    | 82.5 (103.1 - 67.2)   | 44.5 (54 - 33.6)    | 909.2 (1127.8 - 708.1)  |
| Bolivia                | 2174 (2645 - 1811)    | 1856 (2356 - 1404)    | 50843 (65148 - 38787)       | 346 (493 - 229)     | 4.7 (6.6 - 3.1)    | 29.7 (35.9 - 24.7)    | 31.7 (40.1 - 23.6)  | 684.4 (874.6 - 517.1)   |
| Brazil                 | 64956 (75507 - 55011) | 68953 (79266 - 58774) | 1540958 (1764972 - 1318406) | 9931 (13706 - 6734) | 5.4 (7.3 - 3.6)    | 35.5 (41.6 - 30)      | 41.3 (47.9 - 35)    | 840.8 (962.7 - 720.7)   |
| Barbados               | 274 (349 - 221)       | 105 (135 - 78)        | 1955 (2441 - 1496)          | 40 (58 - 26)        | 12.1 (17.5 - 7.9)  | 82.4 (105.1 - 66.3)   | 32.5 (41.7 - 24.1)  | 588.6 (736 - 453.2)     |
| Brunei                 | 540 (645 - 456)       | 92 (113 - 72)         | 2319 (2807 - 1822)          | 82 (116 - 54)       | 27.8 (39.3 - 18.4) | 186.3 (225.1 - 155.3) | 40 (49.5 - 31.5)    | 741.1 (902.6 - 588.1)   |
| Bhutan                 | 431 (505 - 369)       | 267 (419 - 157)       | 6073 (10093 - 3357)         | 66 (91 - 44)        | 12.8 (17.8 - 8.5)  | 85.9 (101.8 - 72.3)   | 68.2 (104.9 - 41.3) | 1285.6 (2103.1 - 728.9) |
| Botswana               | 370 (439 - 305)       | 228 (348 - 155)       | 6050 (8741 - 4245)          | 58 (81 - 39)        | 4.7 (6.6 - 3.2)    | 31 (36.9 - 25.2)      | 27.2 (42.8 - 18.1)  | 495.9 (749.8 - 336.4)   |



|                                  |                             |                             |                                |                          |                    |                       |                      |                          |
|----------------------------------|-----------------------------|-----------------------------|--------------------------------|--------------------------|--------------------|-----------------------|----------------------|--------------------------|
| Central African Republic         | 522 (636 - 402)             | 1430 (2071 - 755)           | 36788 (53623 - 20067)          | 85 (120 - 54)            | 3.1 (4.4 - 2)      | 19.5 (23.9 - 14.9)    | 73.9 (108 - 38)      | 1501.6 (2169.7 - 808.9)  |
| Canada                           | 67161 (80299 - 55932)       | 7835 (9439 - 5781)          | 105845 (122228 - 83239)        | 9733 (13696 - 6305)      | 19.4 (27.4 - 12.5) | 132.9 (158.3 - 111)   | 13.3 (15.9 - 10)     | 203.9 (234.1 - 161.1)    |
| Switzerland                      | 13909 (19348 - 8913)        | 2477 (3327 - 1797)          | 27577 (34346 - 21313)          | 1961 (3030 - 1168)       | 15.8 (24.2 - 9.7)  | 110.3 (152.3 - 73.9)  | 15.6 (20.5 - 11.5)   | 202.4 (247.7 - 157.9)    |
| Chile                            | 11661 (13616 - 9629)        | 5166 (6101 - 3723)          | 93503 (109060 - 71125)         | 1770 (2441 - 1130)       | 9.4 (13 - 6)       | 62.2 (72.8 - 51.6)    | 28.2 (33.4 - 20.3)   | 499.8 (583 - 378.7)      |
| China                            | 2372650 (2487735 - 2271636) | 1184712 (1462700 - 1024961) | 22041833 (26422172 - 19127173) | 355693 (473580 - 246815) | 25.3 (33.8 - 17.6) | 169.5 (177.5 - 162.2) | 94.4 (117.8 - 81.6)  | 1555.2 (1880.9 - 1351.2) |
| Cote d'Ivoire                    | 2353 (2803 - 1929)          | 4583 (7511 - 3266)          | 142653 (214310 - 107414)       | 380 (538 - 257)          | 3.3 (4.7 - 2.2)    | 20.7 (24.9 - 16.5)    | 57.1 (101.8 - 38.7)  | 1252.6 (2030.8 - 895.3)  |
| Cameroon                         | 2466 (2909 - 2067)          | 4863 (8777 - 3189)          | 144665 (237873 - 101732)       | 399 (564 - 257)          | 3.3 (4.7 - 2.2)    | 21.2 (25.4 - 17.7)    | 57 (110.9 - 35.3)    | 1217.2 (2159 - 812.5)    |
| Democratic Republic of the Congo | 6861 (8223 - 5827)          | 23788 (31600 - 17939)       | 675415 (864067 - 519337)       | 1108 (1570 - 755)        | 3.1 (4.4 - 2.1)    | 19.9 (23.5 - 16.7)    | 103.9 (145 - 75.4)   | 2132.5 (2815.2 - 1611.8) |
| Congo                            | 480 (585 - 395)             | 2114 (2801 - 1652)          | 53926 (70214 - 42583)          | 78 (113 - 51)            | 3.1 (4.4 - 2)      | 19.2 (23.7 - 15.7)    | 123.5 (165.5 - 95.4) | 2495.6 (3301.9 - 1958.2) |
| Colombia                         | 41341 (47848 - 35129)       | 16129 (19035 - 13121)       | 300713 (358842 - 244769)       | 6184 (8522 - 4171)       | 16 (21.9 - 10.9)   | 108.7 (125.4 - 93)    | 52.4 (61.8 - 42.6)   | 832.8 (988.7 - 679.2)    |

|                |                          |                       |                          |                       |                    |                       |                      |                          |
|----------------|--------------------------|-----------------------|--------------------------|-----------------------|--------------------|-----------------------|----------------------|--------------------------|
| Comoros        | 62 (78 - 45)             | 310 (472 - 207)       | 7640 (11254 - 5170)      | 10 (15 - 6)           | 2.4 (3.4 - 1.5)    | 14.3 (17.7 - 10.6)    | 124.8 (198.1 - 83.8) | 2392 (3612.6 - 1593.4)   |
| Cape Verde     | 74 (88 - 63)             | 125 (253 - 67)        | 2808 (5135 - 1611)       | 12 (17 - 8)           | 3.3 (4.6 - 2.2)    | 20.6 (24.4 - 17.2)    | 39.2 (80.7 - 20.5)   | 792.1 (1506.9 - 438.5)   |
| Costa Rica     | 4713 (5469 - 4078)       | 979 (1182 - 624)      | 15380 (18112 - 10974)    | 707 (950 - 477)       | 16.7 (22.4 - 11.2) | 112.1 (129.5 - 96.8)  | 26.7 (32.3 - 16.7)   | 381.3 (452.3 - 267.1)    |
| Cuba           | 12085 (15101 - 9418)     | 3872 (5132 - 3132)    | 71839 (88476 - 60468)    | 1770 (2520 - 1162)    | 12 (17.1 - 7.9)    | 81.8 (102.4 - 64)     | 25.4 (33.6 - 20.6)   | 481.7 (593.6 - 405.5)    |
| Cyprus         | 1233 (1752 - 885)        | 227 (295 - 191)       | 3215 (3939 - 2781)       | 179 (279 - 106)       | 15.7 (24.3 - 9.3)  | 107.1 (150.5 - 77.5)  | 18.1 (23.3 - 15.3)   | 290.7 (354 - 252.4)      |
| Czech Republic | 4646 (6028 - 3594)       | 2851 (3614 - 2243)    | 47838 (58443 - 38852)    | 705 (1012 - 462)      | 4.8 (6.9 - 3.1)    | 31.2 (39.4 - 24.3)    | 16.4 (20.6 - 13)     | 295.1 (358 - 238.7)      |
| Germany        | 246024 (292865 - 207175) | 28998 (38360 - 23562) | 387409 (479658 - 328395) | 34845 (47260 - 23733) | 23.6 (32 - 15.9)   | 163.6 (191.3 - 139.2) | 16 (20.8 - 13.1)     | 252.7 (305.8 - 216.2)    |
| Djibouti       | 84 (109 - 66)            | 308 (475 - 205)       | 7368 (11579 - 4807)      | 14 (21 - 9)           | 2.4 (3.5 - 1.5)    | 14.1 (18.3 - 11.3)    | 81.7 (121.7 - 54.9)  | 1564.5 (2442.8 - 1033.6) |
| Dominica       | 55 (68 - 41)             | 23 (30 - 18)          | 450 (576 - 338)          | 8 (12 - 5)            | 12.3 (17.9 - 7.9)  | 84 (104.7 - 62.2)     | 36.6 (47 - 28.5)     | 683.8 (874.9 - 514.4)    |
| Denmark        | 4454 (5524 - 3495)       | 2199 (2722 - 1787)    | 30643 (35731 - 24924)    | 655 (935 - 411)       | 7.8 (11 - 4.9)     | 52.2 (63.6 - 42)      | 22.7 (27.8 - 18.5)   | 346.3 (400.1 - 278.8)    |

|                    |                        |                       |                            |                      |                    |                       |                     |                          |
|--------------------|------------------------|-----------------------|----------------------------|----------------------|--------------------|-----------------------|---------------------|--------------------------|
| Dominican Republic | 6919 (9256 - 5576)     | 3137 (4085 - 2289)    | 66521 (85159 - 49933)      | 1029 (1482 - 663)    | 13.2 (19.2 - 8.5)  | 89.7 (120.4 - 71.2)   | 42.7 (56 - 31)      | 833 (1076.6 - 619.6)     |
| Algeria            | 2142 (2776 - 1641)     | 10200 (12092 - 8713)  | 244851 (291375 - 207936)   | 361 (528 - 229)      | 1.2 (1.8 - 0.8)    | 7.3 (9.4 - 5.6)       | 49.3 (58.8 - 42)    | 900.5 (1064.9 - 770.2)   |
| Ecuador            | 4001 (5093 - 3296)     | 2683 (3262 - 1997)    | 65854 (81078 - 51010)      | 634 (909 - 420)      | 4.9 (7.2 - 3.3)    | 31.6 (40.7 - 25.8)    | 23.1 (28.1 - 17.1)  | 507.2 (622.4 - 389.1)    |
| Egypt              | 4660 (5886 - 3489)     | 45105 (52519 - 39361) | 1107625 (1265227 - 964915) | 786 (1145 - 500)     | 1.3 (1.8 - 0.8)    | 7.5 (9.5 - 5.7)       | 93.3 (109.8 - 80.9) | 1790.1 (2063.9 - 1568.9) |
| Eritrea            | 475 (583 - 379)        | 1412 (1903 - 940)     | 36719 (49497 - 25460)      | 79 (114 - 50)        | 2.3 (3.2 - 1.4)    | 13.8 (16.9 - 11)      | 83.1 (117.2 - 51.7) | 1599.4 (2158.8 - 1059.6) |
| Spain              | 82618 (101509 - 64375) | 17681 (21556 - 12948) | 218821 (252414 - 173863)   | 11896 (16394 - 7676) | 16.6 (22.8 - 10.8) | 113.6 (137.5 - 91)    | 18.7 (22.5 - 14.1)  | 286.8 (329 - 231.1)      |
| Estonia            | 260 (358 - 177)        | 422 (582 - 333)       | 7661 (9830 - 6130)         | 43 (67 - 24)         | 2.4 (3.7 - 1.4)    | 14.3 (19.5 - 10)      | 18.9 (25.4 - 15)    | 392.1 (492.6 - 314.9)    |
| Ethiopia           | 4172 (4934 - 3566)     | 30513 (42487 - 20565) | 652237 (863900 - 470603)   | 722 (1009 - 484)     | 1.4 (1.9 - 0.9)    | 7.8 (9.2 - 6.7)       | 92.9 (135.1 - 59.8) | 1664.6 (2273.9 - 1154.7) |
| Finland            | 11565 (13627 - 9906)   | 1674 (2146 - 1376)    | 27518 (33433 - 23197)      | 1633 (2258 - 1117)   | 18.8 (26.1 - 12.8) | 130.8 (153.8 - 112.6) | 16.5 (20.9 - 13.7)  | 319.6 (383 - 269.2)      |
| Fiji               | 1046 (1224 - 883)      | 460 (575 - 372)       | 12667 (15951 - 10069)      | 157 (218 - 103)      | 25.5 (35.8 - 16.9) | 173.3 (205.1 - 141.6) | 89.1 (110.7 - 73.8) | 1853.7 (2300.1 - 1497.2) |

|                                |                          |                       |                          |                       |                    |                       |                     |                          |
|--------------------------------|--------------------------|-----------------------|--------------------------|-----------------------|--------------------|-----------------------|---------------------|--------------------------|
| France                         | 33407 (43971 - 25623)    | 21601 (26533 - 17144) | 250183 (293380 - 209169) | 4937 (7282 - 3118)    | 4.9 (7.2 - 3.1)    | 32.6 (41.2 - 25.2)    | 16 (19.2 - 13)      | 240.7 (278 - 202)        |
| Federated States of Micronesia | 99 (115 - 87)            | 50 (76 - 31)          | 1332 (2121 - 816)        | 15 (21 - 10)          | 26.2 (36.3 - 17.7) | 177.1 (204 - 154.1)   | 95.5 (139.2 - 61.4) | 2083.5 (3237.2 - 1290.1) |
| Gabon                          | 215 (251 - 175)          | 1119 (1517 - 867)     | 26552 (35372 - 20420)    | 35 (49 - 22)          | 3.1 (4.4 - 2)      | 19.7 (23.2 - 15.8)    | 124 (168.1 - 96)    | 2607.1 (3487 - 2010.5)   |
| United Kingdom                 | 123765 (135816 - 111995) | 22877 (26966 - 17286) | 289820 (331741 - 231307) | 17722 (23550 - 12330) | 18.4 (24.4 - 12.8) | 126.8 (138.3 - 115.5) | 19.3 (22.7 - 14.8)  | 291 (331.9 - 235.7)      |
| Georgia                        | 2287 (2743 - 1920)       | 7971 (9125 - 5856)    | 125444 (143650 - 97930)  | 350 (493 - 236)       | 6.3 (8.9 - 4.2)    | 40.8 (48.6 - 34.4)    | 125.4 (143.3 - 93)  | 2118 (2418.8 - 1674.6)   |
| Ghana                          | 3161 (3743 - 2704)       | 4400 (5484 - 3300)    | 139968 (173989 - 103307) | 514 (728 - 337)       | 3.3 (4.7 - 2.1)    | 20.8 (24.9 - 17.7)    | 36.7 (46.2 - 27.8)  | 872.6 (1086.2 - 649.9)   |
| Guinea                         | 1333 (1613 - 1116)       | 2430 (3810 - 1696)    | 72205 (104758 - 51926)   | 217 (307 - 140)       | 3.3 (4.6 - 2.1)    | 20.7 (25.3 - 17.4)    | 53.7 (91.5 - 35.5)  | 1138.8 (1768.5 - 799.7)  |
| The Gambia                     | 188 (221 - 151)          | 270 (469 - 154)       | 7846 (12864 - 4625)      | 30 (42 - 20)          | 3.4 (4.8 - 2.3)    | 21.7 (25.8 - 17.9)    | 49.7 (93.7 - 27.6)  | 996.5 (1748.5 - 562.6)   |
| Guinea-Bissau                  | 201 (243 - 168)          | 434 (755 - 269)       | 14333 (23437 - 9445)     | 32 (46 - 21)          | 3.3 (4.7 - 2.2)    | 21.3 (25.7 - 17.8)    | 61 (108.8 - 36)     | 1435.2 (2476.7 - 891)    |
| Equatorial Guinea              | 94 (116 - 75)            | 256 (405 - 163)       | 7611 (12191 - 4645)      | 15 (22 - 10)          | 3.2 (4.7 - 2.1)    | 20.3 (25.5 - 16.7)    | 80.6 (125.4 - 53.7) | 1700.5 (2724 - 1083.1)   |

|                                                  |                          |                          |                             |                       |                    |                       |                     |                          |
|--------------------------------------------------|--------------------------|--------------------------|-----------------------------|-----------------------|--------------------|-----------------------|---------------------|--------------------------|
| Greece                                           | 15844 (20073 - 12493)    | 8544 (11030 - 6997)      | 99765 (123357 - 84875)      | 2278 (3227 - 1478)    | 11.9 (16.8 - 7.8)  | 81.3 (101.3 - 65.1)   | 34.7 (44.4 - 28.9)  | 488.7 (591.4 - 418.4)    |
| Grenada                                          | 70 (87 - 55)             | 39 (49 - 32)             | 804 (961 - 665)             | 10 (15 - 7)           | 12.3 (17.3 - 7.8)  | 83.9 (104.9 - 65.3)   | 48.1 (59.4 - 39)    | 963 (1150.1 - 795)       |
| Guatemala                                        | 8923 (10452 - 7625)      | 2020 (2432 - 1373)       | 46288 (54466 - 33505)       | 1310 (1806 - 854)     | 15.5 (21.4 - 10.2) | 107 (126.8 - 91)      | 26.5 (32.2 - 17.8)  | 500.6 (590.1 - 362.1)    |
| Guyana                                           | 352 (426 - 289)          | 299 (374 - 222)          | 8434 (10663 - 6412)         | 53 (76 - 35)          | 12 (17.3 - 8)      | 81.8 (99.2 - 67)      | 81.9 (101.8 - 59.7) | 1773.5 (2218.5 - 1330.8) |
| Hong Kong Special Administrative Region of China | 27054 (32381 - 22780)    | 3276 (4099 - 2510)       | 49017 (59218 - 39513)       | 4027 (5617 - 2735)    | 38.4 (53.7 - 26)   | 257.2 (307.2 - 214.5) | 28.9 (35.9 - 22.1)  | 464 (558.8 - 373.3)      |
| Honduras                                         | 5060 (5898 - 4320)       | 1073 (1608 - 743)        | 29398 (45331 - 19880)       | 759 (1036 - 514)      | 16.1 (21.7 - 10.9) | 108.8 (127.1 - 91.3)  | 24.8 (36.5 - 17.2)  | 552.4 (836.9 - 378.3)    |
| Croatia                                          | 1910 (2332 - 1531)       | 1857 (2320 - 1578)       | 33528 (41123 - 29077)       | 292 (413 - 192)       | 4.7 (6.8 - 3.1)    | 30.6 (36.8 - 24.7)    | 24.9 (30.9 - 21.3)  | 502.2 (613.3 - 438)      |
| Haiti                                            | 4811 (6099 - 3804)       | 4513 (5315 - 3693)       | 124305 (146575 - 101741)    | 719 (1000 - 479)      | 12 (16.8 - 8)      | 82.5 (107.5 - 63.3)   | 87.4 (103.3 - 70.5) | 1823.7 (2154.4 - 1483.7) |
| Hungary                                          | 4739 (5785 - 3722)       | 4143 (6252 - 3129)       | 74008 (101745 - 59358)      | 720 (1037 - 454)      | 5.2 (7.4 - 3.3)    | 33.6 (40.8 - 26.2)    | 24.9 (37 - 19.1)    | 496.4 (664.7 - 404.4)    |
| Indonesia                                        | 297892 (345275 - 252241) | 137075 (165435 - 115277) | 3502461 (4107028 - 2947100) | 44931 (61999 - 29797) | 26.6 (36.7 - 17.6) | 179.8 (208.5 - 148.6) | 89.7 (110.9 - 74.5) | 1860.8 (2221.4 - 1568.1) |

|         |                           |                          |                              |                         |                   |                       |                    |                         |
|---------|---------------------------|--------------------------|------------------------------|-------------------------|-------------------|-----------------------|--------------------|-------------------------|
| India   | 846459 (1006176 - 712713) | 381446 (487330 - 294382) | 9506078 (12042460 - 7431974) | 127442 (177997 - 83823) | 13.3 (18.3 - 8.8) | 89.6 (106.6 - 75)     | 50.8 (65.7 - 39.1) | 1038 (1319 - 809.3)     |
| Ireland | 5708 (7694 - 4165)        | 1073 (1296 - 808)        | 15840 (18568 - 12619)        | 834 (1219 - 514)        | 15.3 (22.4 - 9.5) | 104.6 (141 - 76.8)    | 18.6 (22.4 - 14.1) | 287.6 (337.6 - 229.7)   |
| Iran    | 8945 (10355 - 7655)       | 12057 (15439 - 8700)     | 229186 (282548 - 172356)     | 1473 (2060 - 981)       | 2.4 (3.3 - 1.6)   | 14.6 (17 - 12.5)      | 27.9 (36.5 - 20)   | 431 (536.8 - 319.2)     |
| Iraq    | 1301 (1685 - 955)         | 7411 (9414 - 5739)       | 200541 (254940 - 154884)     | 220 (325 - 136)         | 1.2 (1.7 - 0.7)   | 7 (9.2 - 5)           | 57.6 (72.9 - 45)   | 1140.6 (1461.6 - 870.9) |
| Iceland | 403 (506 - 320)           | 70 (88 - 53)             | 890 (1074 - 704)             | 58 (84 - 38)            | 14.6 (21.1 - 9.6) | 100.3 (125.1 - 79.9)  | 14.9 (18.6 - 11.5) | 214.7 (258.1 - 170.1)   |
| Israel  | 4620 (5500 - 3868)        | 1153 (1457 - 703)        | 14580 (17707 - 9770)         | 671 (919 - 449)         | 8.3 (11.3 - 5.6)  | 56.4 (66.9 - 47.7)    | 12.6 (15.9 - 7.8)  | 174.7 (212.2 - 119.5)   |
| Italy   | 88890 (104557 - 74424)    | 28308 (34724 - 20402)    | 320274 (381144 - 249789)     | 12755 (17400 - 8670)    | 11.8 (16.1 - 8.1) | 80.6 (92.5 - 70)      | 19.1 (23.1 - 14.2) | 272.2 (321 - 218.8)     |
| Jamaica | 2012 (2618 - 1577)        | 934 (1161 - 721)         | 16743 (20787 - 13328)        | 298 (430 - 193)         | 12.2 (17.7 - 7.8) | 82.3 (108.3 - 64.1)   | 38.6 (47.9 - 29.7) | 682.5 (844 - 540.6)     |
| Jordan  | 338 (423 - 266)           | 536 (658 - 436)          | 12165 (15043 - 9744)         | 57 (83 - 37)            | 1.3 (1.8 - 0.8)   | 7.5 (9.5 - 5.9)       | 21 (26.1 - 17.2)   | 344.7 (424.9 - 278.2)   |
| Japan   | 453718 (545896 - 373072)  | 68007 (80497 - 54476)    | 967981 (1103961 - 829670)    | 66172 (91409 - 43120)   | 26.2 (36 - 17.3)  | 175.9 (204.7 - 149.5) | 21.7 (25 - 18.1)   | 412.3 (468 - 356.9)     |

|             |                          |                       |                          |                       |                    |                       |                      |                          |
|-------------|--------------------------|-----------------------|--------------------------|-----------------------|--------------------|-----------------------|----------------------|--------------------------|
| Kazakhstan  | 5771 (6825 - 4759)       | 10750 (12954 - 8455)  | 246753 (296079 - 201264) | 896 (1247 - 599)      | 6 (8.3 - 4)        | 38.9 (46 - 32.1)      | 87.5 (107.4 - 68.1)  | 1748.5 (2095.7 - 1403.6) |
| Kenya       | 3687 (4620 - 2927)       | 6261 (8475 - 4760)    | 139483 (181355 - 110867) | 617 (888 - 388)       | 2.4 (3.5 - 1.5)    | 14.8 (18.4 - 11.7)    | 48 (67.1 - 34.2)     | 805.2 (1081.7 - 618.1)   |
| Kyrgyzstan  | 1520 (1800 - 1297)       | 2545 (3024 - 2167)    | 66332 (76868 - 56146)    | 239 (335 - 157)       | 6.1 (8.5 - 4)      | 39.1 (46 - 33.3)      | 82.5 (99.3 - 69.9)   | 1842.1 (2162 - 1567.4)   |
| Cambodia    | 17376 (20510 - 14855)    | 7467 (10474 - 5864)   | 186107 (241298 - 148692) | 2391 (3320 - 1607)    | 24.6 (34.3 - 16.7) | 182.9 (217.9 - 154.5) | 79.1 (113.2 - 62)    | 1733.6 (2294.3 - 1371.3) |
| Kiribati    | 101 (115 - 88)           | 79 (106 - 56)         | 2481 (3372 - 1730)       | 15 (21 - 10)          | 26.4 (35.8 - 18.1) | 179.6 (204.9 - 154.4) | 135.6 (175.9 - 96.5) | 3375.2 (4519.3 - 2393.8) |
| South Korea | 130912 (148841 - 112203) | 19839 (27054 - 16073) | 342220 (431821 - 294212) | 19264 (26641 - 12629) | 31.1 (43 - 20.5)   | 211.5 (240.7 - 181.6) | 33.4 (46.1 - 26.9)   | 551.6 (697.1 - 473.6)    |
| Kuwait      | 188 (232 - 148)          | 160 (212 - 135)       | 4860 (6013 - 4106)       | 32 (46 - 20)          | 1.4 (2 - 0.9)      | 8.1 (9.7 - 6.5)       | 14 (20.2 - 11.1)     | 248.1 (328.8 - 208.7)    |
| Laos        | 5767 (6666 - 5062)       | 2444 (3790 - 1447)    | 72018 (111808 - 42385)   | 858 (1171 - 573)      | 25.5 (35 - 17)     | 175.3 (203.3 - 153.9) | 77.7 (117.5 - 48.8)  | 1759.5 (2753.1 - 1039.4) |
| Lebanon     | 362 (471 - 281)          | 897 (1501 - 257)      | 15053 (23731 - 4796)     | 61 (94 - 39)          | 1.3 (2 - 0.8)      | 7.9 (10.3 - 6.1)      | 23.2 (39 - 6.5)      | 351.8 (559.4 - 110.4)    |
| Liberia     | 497 (603 - 413)          | 957 (1581 - 679)      | 27660 (42421 - 20629)    | 79 (112 - 52)         | 3.3 (4.7 - 2.2)    | 21.6 (26.1 - 18)      | 61.7 (109.3 - 41.3)  | 1276.7 (2090.4 - 909.7)  |

|                                              |                       |                    |                          |                    |                    |                       |                     |                          |
|----------------------------------------------|-----------------------|--------------------|--------------------------|--------------------|--------------------|-----------------------|---------------------|--------------------------|
| Libya                                        | 75 (100 - 56)         | 1665 (2167 - 1273) | 40671 (51091 - 32274)    | 13 (19 - 8)        | 0.3 (0.4 - 0.2)    | 1.6 (2.1 - 1.2)       | 51.9 (68.3 - 38.9)  | 945.2 (1204.1 - 737.4)   |
| Saint Lucia                                  | 150 (187 - 117)       | 69 (86 - 52)       | 1257 (1554 - 972)        | 22 (31 - 14)       | 12.8 (18.4 - 8.2)  | 87.1 (108.7 - 66.8)   | 40 (50.1 - 30.1)    | 730 (905.1 - 562.8)      |
| Sri Lanka                                    | 36490 (42159 - 31274) | 3295 (5500 - 2408) | 82987 (116855 - 64793)   | 5420 (7384 - 3641) | 27.6 (37.5 - 18.4) | 186.8 (216.7 - 158.6) | 17.6 (30.6 - 12.5)  | 397.3 (582.9 - 310.6)    |
| Lesotho                                      | 364 (432 - 309)       | 751 (1063 - 571)   | 20386 (28552 - 15628)    | 56 (78 - 36)       | 4.7 (6.7 - 3)      | 31.4 (38.2 - 26.1)    | 75.8 (108.9 - 56.8) | 1671.6 (2348.7 - 1281.9) |
| Lithuania                                    | 420 (612 - 297)       | 1057 (1380 - 847)  | 18947 (23267 - 15669)    | 70 (112 - 42)      | 1.7 (2.8 - 1.1)    | 10.3 (15 - 7.3)       | 20.5 (26.1 - 16.8)  | 428.7 (520.4 - 355.9)    |
| Luxembourg                                   | 745 (1062 - 544)      | 201 (249 - 152)    | 2549 (3060 - 2031)       | 107 (165 - 68)     | 14.8 (22.6 - 9.3)  | 101.6 (144.9 - 73.9)  | 23.4 (28.9 - 17.9)  | 335.3 (402.1 - 265.6)    |
| Latvia                                       | 351 (491 - 240)       | 1122 (1646 - 885)  | 18424 (24782 - 15325)    | 58 (90 - 33)       | 2.1 (3.2 - 1.2)    | 12.5 (17.6 - 8.8)     | 30.6 (43.4 - 24.6)  | 575.3 (749 - 483.1)      |
| Macao Special Administrative Region of China | 1114 (1324 - 919)     | 135 (187 - 78)     | 2604 (3592 - 1616)       | 166 (229 - 110)    | 28.1 (38.9 - 18.7) | 190.2 (225.9 - 155.9) | 25.4 (35.7 - 14.8)  | 426 (579.7 - 261.8)      |
| Morocco                                      | 2022 (2605 - 1569)    | 5612 (7206 - 4572) | 149733 (189351 - 121605) | 341 (492 - 212)    | 1.3 (1.9 - 0.8)    | 7.8 (10.3 - 6)        | 28 (36.3 - 22.7)    | 585.4 (743.2 - 477.8)    |
| Moldova                                      | 506 (683 - 363)       | 2702 (3498 - 2334) | 55685 (69896 - 48502)    | 84 (125 - 49)      | 2 (3 - 1.2)        | 12.2 (16.6 - 8.7)     | 64.5 (83.9 - 55.6)  | 1279.9 (1609.6 - 1114.3) |



|                  |                         |                       |                           |                       |                    |                       |                       |                          |
|------------------|-------------------------|-----------------------|---------------------------|-----------------------|--------------------|-----------------------|-----------------------|--------------------------|
| Madagascar       | 1824 (2196 - 1435)      | 16019 (21196 - 12158) | 446382 (584877 - 334437)  | 304 (429 - 199)       | 2.3 (3.3 - 1.5)    | 14.1 (17.2 - 11.3)    | 190.2 (258.8 - 144.3) | 4059 (5385.8 - 3068.2)   |
| Maldives         | 367 (431 - 319)         | 40 (54 - 31)          | 1229 (1478 - 1002)        | 55 (76 - 37)          | 27 (37.4 - 18.2)   | 183.6 (218.2 - 157.1) | 21.2 (30.3 - 16.2)    | 492.1 (612.5 - 396.8)    |
| Mexico           | 102394 (106019 - 98856) | 28501 (32865 - 24804) | 541978 (621914 - 486779)  | 15471 (20491 - 10773) | 16.2 (21.4 - 11.3) | 109 (112.9 - 105.2)   | 34.4 (39.5 - 29.8)    | 583.9 (672.2 - 521.3)    |
| Marshall Islands | 57 (64 - 50)            | 31 (42 - 20)          | 919 (1267 - 592)          | 9 (12 - 6)            | 24.8 (33.3 - 16.7) | 167.8 (190.8 - 145.8) | 98.7 (131.6 - 64.7)   | 2185.9 (2971.5 - 1425.3) |
| Macedonia        | 709 (861 - 576)         | 1223 (1454 - 1027)    | 24494 (28217 - 20896)     | 110 (156 - 72)        | 4.3 (6.1 - 2.9)    | 27.6 (33.4 - 22.5)    | 48.2 (58 - 40.5)      | 937.6 (1078.2 - 796.5)   |
| Mali             | 1489 (1777 - 1207)      | 2972 (4169 - 2102)    | 101024 (132205 - 76441)   | 242 (340 - 161)       | 3.3 (4.6 - 2.1)    | 20.6 (24.9 - 16.6)    | 53.6 (82.6 - 35.3)    | 1244.1 (1750.7 - 884.1)  |
| Malta            | 640 (905 - 432)         | 124 (151 - 100)       | 1775 (2121 - 1481)        | 93 (143 - 56)         | 14.5 (21.9 - 8.9)  | 99.5 (138.4 - 69.9)   | 20.2 (24.9 - 16.3)    | 283.3 (336.6 - 236.1)    |
| Myanmar          | 65746 (74827 - 57368)   | 28534 (48075 - 15667) | 686194 (1120966 - 370228) | 9753 (13280 - 6721)   | 26.1 (35.4 - 18.2) | 179.7 (206.3 - 156.2) | 88.7 (155.3 - 50.6)   | 1725 (2839.9 - 948.3)    |
| Montenegro       | 244 (305 - 188)         | 1366 (1565 - 1206)    | 20007 (22824 - 17454)     | 37 (54 - 23)          | 4.9 (7 - 3.1)      | 31.8 (39.2 - 25)      | 177.1 (203.7 - 156.3) | 2535.5 (2898.1 - 2213.7) |
| Mongolia         | 825 (974 - 671)         | 3069 (3507 - 2600)    | 81733 (94756 - 69927)     | 130 (183 - 83)        | 6.3 (8.8 - 4.1)    | 41 (48.7 - 33.4)      | 221.5 (252 - 185.7)   | 4464.9 (5103.7 - 3783.6) |

|             |                       |                       |                          |                    |                    |                       |                     |                          |
|-------------|-----------------------|-----------------------|--------------------------|--------------------|--------------------|-----------------------|---------------------|--------------------------|
| Mozambique  | 2122 (2627 - 1677)    | 5413 (7150 - 3888)    | 130902 (164074 - 101086) | 354 (512 - 226)    | 2.4 (3.5 - 1.6)    | 14.8 (18.7 - 11.5)    | 58 (79.1 - 39.4)    | 1147 (1484.1 - 852.3)    |
| Mauritania  | 475 (581 - 388)       | 784 (1332 - 500)      | 21801 (33604 - 14611)    | 77 (110 - 50)      | 3.4 (4.9 - 2.2)    | 21.5 (26.5 - 17.8)    | 53.1 (97.6 - 31.8)  | 1077.5 (1803.8 - 693.4)  |
| Mauritius   | 2315 (2623 - 2042)    | 387 (498 - 307)       | 10551 (13256 - 8498)     | 344 (470 - 237)    | 27.5 (37.6 - 19.1) | 186.3 (210.4 - 164.3) | 29.9 (39.3 - 23.6)  | 753.6 (949.1 - 607.9)    |
| Malawi      | 1238 (1550 - 953)     | 3255 (4703 - 2402)    | 74394 (101349 - 57214)   | 208 (303 - 133)    | 2.3 (3.4 - 1.5)    | 13.9 (17.6 - 11.1)    | 62.9 (94.9 - 44.4)  | 1102.2 (1563.6 - 820.9)  |
| Malaysia    | 39745 (45635 - 34203) | 7274 (8957 - 6195)    | 186606 (228121 - 159670) | 5937 (8067 - 4006) | 29.7 (40.2 - 20.4) | 202.4 (233.7 - 173.7) | 40.5 (49.9 - 34)    | 835.4 (1022.9 - 715.8)   |
| Namibia     | 399 (470 - 325)       | 707 (928 - 573)       | 17601 (22771 - 14153)    | 63 (87 - 40)       | 4.5 (6.3 - 3)      | 29.6 (34.9 - 24.3)    | 76.7 (103.3 - 61.8) | 1481.5 (1944.4 - 1199.2) |
| Niger       | 1796 (2202 - 1453)    | 2069 (3874 - 1177)    | 60778 (101771 - 36724)   | 291 (412 - 183)    | 3.3 (4.7 - 2.1)    | 21 (26.3 - 16.9)      | 37.8 (79.8 - 19.2)  | 738.7 (1380.8 - 419.1)   |
| Nigeria     | 19178 (23405 - 15252) | 20481 (34537 - 14789) | 630705 (991236 - 470371) | 3083 (4449 - 1992) | 3.3 (4.8 - 2.1)    | 21 (26.5 - 16.7)      | 37.5 (66.3 - 26)    | 720.7 (1213.8 - 520)     |
| Nicaragua   | 4059 (4634 - 3477)    | 1551 (1772 - 1260)    | 26177 (29969 - 22076)    | 580 (811 - 400)    | 15.3 (21.2 - 10.5) | 109.8 (126.7 - 93.1)  | 50 (57.2 - 40.3)    | 748.2 (856.5 - 624.1)    |
| Netherlands | 22892 (27563 - 17885) | 5148 (6678 - 3832)    | 69325 (84567 - 55480)    | 3320 (4695 - 2120) | 13.1 (18.6 - 8.4)  | 89.3 (107.3 - 70.4)   | 17.7 (22.7 - 13.4)  | 265.1 (320.9 - 213.3)    |

|                  |                         |                       |                            |                       |                    |                       |                    |                          |
|------------------|-------------------------|-----------------------|----------------------------|-----------------------|--------------------|-----------------------|--------------------|--------------------------|
| Norway           | 4889 (6116 - 3858)      | 1642 (2107 - 1254)    | 19753 (24058 - 15791)      | 715 (1028 - 463)      | 10.2 (14.7 - 6.7)  | 69 (85.1 - 54.8)      | 19 (24 - 14.8)     | 261.7 (315 - 209.4)      |
| Nepal            | 15786 (18270 - 12929)   | 8044 (11048 - 5068)   | 179628 (241965 - 116731)   | 2382 (3286 - 1597)    | 12.5 (17.2 - 8.3)  | 83.7 (97.1 - 69.5)    | 57.3 (79.9 - 35.8) | 1040.1 (1405 - 662.9)    |
| New Zealand      | 8601 (10119 - 7130)     | 934 (1128 - 714)      | 14973 (17254 - 12470)      | 1257 (1711 - 837)     | 21.7 (29.4 - 14.4) | 147.3 (171.8 - 122.6) | 14.3 (17 - 11.1)   | 253.4 (292.4 - 211)      |
| Oman             | 173 (224 - 126)         | 560 (702 - 438)       | 12329 (15642 - 9541)       | 29 (44 - 18)          | 1.3 (2 - 0.8)      | 7.9 (10.3 - 5.8)      | 51.2 (64.4 - 40.2) | 834.9 (1045.2 - 645.9)   |
| Pakistan         | 100840 (117039 - 85374) | 59309 (79834 - 39064) | 1422884 (1894784 - 967337) | 15204 (20805 - 10216) | 13.6 (18.7 - 9.1)  | 92.3 (108.3 - 77.4)   | 69.5 (92.9 - 45.6) | 1337.7 (1789.6 - 889.8)  |
| Panama           | 3460 (4002 - 2931)      | 1489 (1845 - 954)     | 22259 (27511 - 15605)      | 519 (716 - 347)       | 16.2 (22.3 - 10.8) | 108.8 (127.2 - 91.7)  | 50.8 (63 - 32.3)   | 717.2 (885.7 - 498)      |
| Peru             | 7280 (9208 - 5869)      | 3815 (4771 - 2956)    | 91340 (114734 - 69719)     | 1143 (1651 - 727)     | 4.6 (6.7 - 2.9)    | 29.7 (38.7 - 23.8)    | 18.1 (22.7 - 14)   | 373 (466.1 - 285)        |
| Philippines      | 94367 (108517 - 80498)  | 31141 (39473 - 25052) | 929920 (1165741 - 746637)  | 14039 (19148 - 9577)  | 25.9 (35.4 - 17.7) | 178.3 (208 - 151.2)   | 60 (76.8 - 48.4)   | 1418.7 (1775.9 - 1148.3) |
| Papua New Guinea | 5481 (6376 - 4766)      | 1185 (1747 - 743)     | 38360 (57608 - 24454)      | 828 (1125 - 563)      | 25 (34 - 17.2)     | 170 (199.9 - 147.5)   | 38.4 (54.1 - 24.9) | 907.2 (1320.6 - 578.7)   |
| Poland           | 13521 (16773 - 10726)   | 15218 (22471 - 11608) | 281702 (363614 - 232565)   | 2082 (2964 - 1324)    | 4 (5.7 - 2.6)      | 26 (32.1 - 20.8)      | 26.2 (37.5 - 20.3) | 523.1 (663.3 - 437.2)    |

|              |                       |                       |                             |                    |                    |                       |                       |                          |
|--------------|-----------------------|-----------------------|-----------------------------|--------------------|--------------------|-----------------------|-----------------------|--------------------------|
| North Korea  | 45392 (55995 - 35680) | 32396 (41223 - 26755) | 696078 (878669 - 563088)    | 6776 (9661 - 4457) | 28.5 (40.6 - 18.6) | 192.5 (238.2 - 151.2) | 153.7 (196.2 - 127.1) | 2835.5 (3594.2 - 2332)   |
| Portugal     | 26957 (35635 - 19996) | 7500 (9469 - 6245)    | 102161 (123891 - 87699)     | 3855 (5732 - 2371) | 21.7 (31.7 - 13.6) | 149.4 (192.5 - 113)   | 36 (45.1 - 30.3)      | 568 (680 - 488.8)        |
| Paraguay     | 1732 (2067 - 1446)    | 2103 (2562 - 1386)    | 46541 (56258 - 32310)       | 267 (378 - 174)    | 5.4 (7.7 - 3.6)    | 35.8 (42.7 - 29.9)    | 52 (63.7 - 33.6)      | 1016.3 (1233.6 - 690.6)  |
| Palestine    | 232 (287 - 175)       | 1220 (1520 - 983)     | 28359 (35389 - 22652)       | 39 (57 - 24)       | 1.7 (2.5 - 1)      | 10.2 (12.8 - 7.8)     | 98.9 (121 - 81.1)     | 1521.7 (1913.3 - 1216.4) |
| Qatar        | 128 (182 - 86)        | 75 (93 - 58)          | 2754 (3426 - 2170)          | 22 (34 - 12)       | 1.5 (2.2 - 0.9)    | 8.7 (11.7 - 6.2)      | 16.1 (20.4 - 12.9)    | 248.6 (300.9 - 199)      |
| Romania      | 8215 (10124 - 6712)   | 15503 (21821 - 12368) | 264785 (342116 - 223067)    | 1270 (1822 - 833)  | 4.5 (6.4 - 2.9)    | 28.6 (35 - 23.5)      | 47.9 (66.1 - 38.7)    | 864.7 (1111.7 - 736.1)   |
| Russia       | 28356 (34618 - 21905) | 57468 (70248 - 49156) | 1339864 (1590067 - 1151769) | 4611 (6633 - 2919) | 2.5 (3.6 - 1.6)    | 15.3 (18.4 - 11.9)    | 29.3 (35.3 - 25.4)    | 704.2 (836.7 - 614)      |
| Rwanda       | 922 (1199 - 704)      | 2524 (3932 - 1801)    | 57822 (84043 - 42136)       | 154 (228 - 97)     | 2.4 (3.4 - 1.5)    | 14.5 (18.3 - 11.3)    | 76.6 (125.8 - 52.4)   | 1342.9 (2056.7 - 966.2)  |
| Saudi Arabia | 423 (557 - 316)       | 3538 (4338 - 2905)    | 79707 (98589 - 64764)       | 73 (106 - 44)      | 0.4 (0.5 - 0.2)    | 2.1 (2.8 - 1.7)       | 31.2 (38.4 - 25.5)    | 517.4 (643.5 - 418.5)    |
| Sudan        | 1636 (2096 - 1205)    | 10365 (13718 - 7821)  | 298390 (390087 - 224074)    | 277 (411 - 170)    | 1.3 (1.9 - 0.8)    | 7.8 (10.1 - 5.8)      | 72.5 (96.6 - 55.2)    | 1413.3 (1887.4 - 1056.7) |

|                       |                     |                    |                        |                   |                    |                       |                      |                          |
|-----------------------|---------------------|--------------------|------------------------|-------------------|--------------------|-----------------------|----------------------|--------------------------|
| Senegal               | 1508 (1801 - 1225)  | 2369 (3838 - 1603) | 62035 (88959 - 44996)  | 244 (350 - 158)   | 3.3 (4.7 - 2.1)    | 20.8 (25 - 16.8)      | 50.4 (88 - 32.5)     | 993.3 (1579.7 - 681.6)   |
| Singapore             | 8764 (10394 - 7267) | 1006 (1227 - 745)  | 16409 (19786 - 13400)  | 1296 (1819 - 840) | 27.7 (39 - 18.1)   | 187.4 (222.6 - 155.5) | 21.1 (25.7 - 15.8)   | 346.3 (414.2 - 284)      |
| Solomon Islands       | 436 (500 - 379)     | 289 (434 - 184)    | 8314 (12855 - 5061)    | 66 (89 - 46)      | 26.3 (35.7 - 18.2) | 178.1 (206.9 - 151.3) | 124.6 (180.9 - 81.1) | 2765.6 (4174.2 - 1752)   |
| Sierra Leone          | 666 (798 - 524)     | 1365 (2202 - 907)  | 43946 (64272 - 31465)  | 108 (154 - 69)    | 3.3 (4.7 - 2.1)    | 20.6 (24.7 - 15.8)    | 65.9 (121.9 - 39.5)  | 1401 (2291 - 920.7)      |
| El Salvador           | 5085 (6005 - 4320)  | 1283 (1557 - 977)  | 24034 (29386 - 19440)  | 746 (1032 - 491)  | 15.7 (21.8 - 10.4) | 107.4 (127.8 - 90.8)  | 26.9 (32.6 - 20.4)   | 489.6 (598.9 - 395.5)    |
| Somalia               | 809 (1013 - 627)    | 2653 (4202 - 1503) | 64976 (103435 - 36664) | 136 (194 - 86)    | 2.4 (3.5 - 1.5)    | 14.6 (18 - 11.7)      | 79.6 (127.8 - 44.4)  | 1537 (2445.1 - 858.9)    |
| Serbia                | 3536 (4275 - 2766)  | 3163 (3911 - 2758) | 63130 (77051 - 55652)  | 551 (779 - 348)   | 4.5 (6.4 - 2.8)    | 28.6 (34.3 - 22.7)    | 23.4 (28.8 - 20.4)   | 489.9 (594.6 - 433.3)    |
| South Sudan           | 922 (1152 - 725)    | 3297 (4354 - 2488) | 80952 (104161 - 63154) | 154 (222 - 98)    | 2.3 (3.3 - 1.5)    | 13.8 (17 - 10.9)      | 78.3 (107 - 56.9)    | 1529.4 (2003.9 - 1164.2) |
| Sao Tome and Principe | 22 (27 - 17)        | 77 (98 - 54)       | 2136 (2768 - 1381)     | 4 (5 - 2)         | 3.3 (4.7 - 2.2)    | 21 (26.2 - 16.4)      | 99.3 (125.6 - 72.9)  | 1948.1 (2527.6 - 1324.8) |
| Suriname              | 360 (450 - 290)     | 208 (265 - 147)    | 4808 (6139 - 3563)     | 54 (77 - 35)      | 12.3 (17.6 - 7.9)  | 83.5 (107.5 - 65.1)   | 53.2 (67.5 - 36.7)   | 1074.1 (1367.2 - 781.7)  |

|            |                          |                       |                          |                       |                    |                       |                      |                          |
|------------|--------------------------|-----------------------|--------------------------|-----------------------|--------------------|-----------------------|----------------------|--------------------------|
| Slovakia   | 2094 (2511 - 1701)       | 1396 (1705 - 1120)    | 27171 (32465 - 22282)    | 324 (455 - 208)       | 4.6 (6.5 - 3)      | 29.9 (35.6 - 24.4)    | 19.1 (23.4 - 15.4)   | 375.5 (448.1 - 306.9)    |
| Slovenia   | 923 (1178 - 720)         | 554 (674 - 407)       | 8935 (10480 - 7117)      | 140 (200 - 89)        | 4.8 (6.8 - 3)      | 31.1 (39.4 - 24.5)    | 15.3 (18.4 - 11.5)   | 278.5 (326.3 - 222.8)    |
| Sweden     | 22619 (27967 - 18115)    | 3328 (4241 - 2642)    | 41773 (49781 - 33567)    | 3246 (4518 - 2091)    | 21.5 (29.7 - 14)   | 147.2 (178.7 - 120.5) | 17.2 (21.7 - 13.7)   | 256.8 (301.1 - 206.9)    |
| Swaziland  | 195 (231 - 159)          | 368 (480 - 291)       | 10420 (13509 - 8247)     | 30 (43 - 20)          | 4.5 (6.3 - 3)      | 29.5 (35 - 24.1)      | 74 (97.4 - 58.3)     | 1567.9 (2049.6 - 1234.5) |
| Seychelles | 148 (167 - 131)          | 43 (67 - 29)          | 852 (1188 - 607)         | 22 (30 - 15)          | 26.2 (35.4 - 17.9) | 179.3 (204.3 - 158.3) | 53.8 (83.9 - 35.6)   | 987.5 (1403 - 694.6)     |
| Syria      | 1119 (1443 - 813)        | 9447 (11925 - 7134)   | 219008 (277326 - 170266) | 190 (286 - 117)       | 1.3 (2 - 0.8)      | 7.9 (10.4 - 5.8)      | 100.4 (130.2 - 74.9) | 1731.6 (2196.8 - 1309)   |
| Chad       | 1200 (1414 - 1015)       | 1450 (2597 - 933)     | 46461 (72863 - 32225)    | 193 (268 - 128)       | 3.2 (4.4 - 2.1)    | 20.4 (24.2 - 17.1)    | 36.5 (73.1 - 21.5)   | 759.1 (1355 - 491.1)     |
| Togo       | 732 (895 - 573)          | 1102 (1858 - 732)     | 33315 (49677 - 23524)    | 119 (169 - 78)        | 3.2 (4.6 - 2.1)    | 20.4 (24.5 - 15.9)    | 49.3 (94.1 - 30.6)   | 980.8 (1647.8 - 650.1)   |
| Thailand   | 128845 (145930 - 111097) | 40647 (58425 - 30836) | 701979 (919152 - 553478) | 19278 (26428 - 13224) | 26.5 (36.2 - 18.2) | 177.9 (202.3 - 153.3) | 61.9 (90.2 - 46.6)   | 975.6 (1298.3 - 766.6)   |
| Tajikistan | 1957 (2322 - 1605)       | 2732 (3493 - 2088)    | 59355 (73790 - 46138)    | 306 (426 - 204)       | 6.2 (8.5 - 4.2)    | 40.8 (48.6 - 32.7)    | 86 (112.1 - 65.2)    | 1530.7 (1934.3 - 1174)   |

|                     |                       |                       |                          |                      |                    |                       |                       |                          |
|---------------------|-----------------------|-----------------------|--------------------------|----------------------|--------------------|-----------------------|-----------------------|--------------------------|
| Turkmenistan        | 1682 (2034 - 1394)    | 4383 (5448 - 3613)    | 100397 (127459 - 80066)  | 264 (375 - 172)      | 6.9 (9.9 - 4.5)    | 44.9 (54.8 - 36.8)    | 166.1 (203.3 - 139.7) | 3060.1 (3860.3 - 2484.9) |
| Timor-Leste         | 841 (974 - 714)       | 229 (311 - 151)       | 6673 (8814 - 4673)       | 126 (172 - 83)       | 27.2 (37.4 - 18.1) | 185.9 (216.2 - 156.2) | 56.2 (79.5 - 36)      | 1171 (1570.3 - 787.9)    |
| Tonga               | 119 (140 - 103)       | 38 (48 - 27)          | 759 (969 - 562)          | 18 (24 - 12)         | 26.2 (36.1 - 17.6) | 177.2 (209.9 - 152)   | 57.3 (72.9 - 41.7)    | 1069.6 (1363.1 - 792)    |
| Trinidad and Tobago | 1152 (1464 - 923)     | 494 (586 - 366)       | 10885 (13015 - 8316)     | 171 (246 - 111)      | 12.7 (18.2 - 8.3)  | 86.4 (110.6 - 70)     | 39.5 (47 - 29.1)      | 787.2 (940.4 - 602.1)    |
| Tunisia             | 835 (1124 - 671)      | 3337 (4488 - 2214)    | 59882 (80164 - 42086)    | 141 (207 - 90)       | 1.4 (2 - 0.9)      | 8.1 (11 - 6.5)        | 41.2 (55.6 - 26.8)    | 645.1 (862.8 - 445.9)    |
| Turkey              | 5768 (7364 - 4333)    | 19661 (23319 - 16170) | 384124 (451635 - 318762) | 970 (1391 - 595)     | 1.5 (2.1 - 0.9)    | 8.7 (10.8 - 6.5)      | 35.2 (42 - 28.9)      | 603.4 (709.5 - 499.9)    |
| Taiwan              | 79122 (93300 - 65571) | 7385 (8848 - 6423)    | 147798 (170186 - 131554) | 11703 (16447 - 7796) | 39.8 (56.3 - 26.4) | 269.8 (320 - 222)     | 24.7 (29.5 - 21.5)    | 502.3 (581.7 - 447.4)    |
| Tanzania            | 4751 (5925 - 3748)    | 6152 (8435 - 4535)    | 143418 (182027 - 111786) | 784 (1145 - 502)     | 2.9 (4.3 - 1.8)    | 17.8 (22.9 - 13.6)    | 37.9 (52.9 - 26.2)    | 666.3 (899.5 - 503.9)    |
| Uganda              | 2721 (3409 - 2167)    | 6028 (9046 - 4202)    | 141481 (196734 - 101863) | 456 (666 - 288)      | 2.5 (3.6 - 1.6)    | 15 (18.7 - 12.2)      | 61 (96.9 - 41.1)      | 1090.6 (1595.8 - 770.6)  |
| Ukraine             | 8495 (11296 - 6007)   | 27709 (39951 - 21692) | 542670 (733024 - 434914) | 1401 (2113 - 835)    | 2.3 (3.4 - 1.4)    | 13.7 (18.2 - 9.8)     | 38.8 (54.9 - 30.4)    | 820.3 (1078.8 - 660.8)   |

|                                  |                           |                       |                             |                         |                    |                       |                      |                          |
|----------------------------------|---------------------------|-----------------------|-----------------------------|-------------------------|--------------------|-----------------------|----------------------|--------------------------|
| Uruguay                          | 2376 (2830 - 2000)        | 1482 (1781 - 1034)    | 23058 (27560 - 16827)       | 357 (491 - 240)         | 8.8 (12.1 - 6)     | 58.3 (69 - 49.4)      | 30.2 (36.2 - 21.3)   | 542.7 (651.1 - 397.3)    |
| United States                    | 949595 (1046758 - 849424) | 77419 (92237 - 56812) | 1295508 (1481442 - 1036041) | 136997 (184826 - 96068) | 34.2 (46.2 - 23.9) | 235.1 (258.7 - 210.6) | 16.6 (19.6 - 12.3)   | 311.2 (355.2 - 249.6)    |
| Uzbekistan                       | 8166 (9660 - 6776)        | 10703 (13448 - 8706)  | 238956 (304975 - 190174)    | 1282 (1806 - 846)       | 6.1 (8.7 - 4.1)    | 39.6 (47.8 - 32.1)    | 69.9 (88.2 - 56.4)   | 1323 (1679.1 - 1059.2)   |
| Saint Vincent and the Grenadines | 77 (96 - 59)              | 34 (43 - 28)          | 727 (883 - 593)             | 11 (16 - 7)             | 12.3 (17.6 - 8)    | 83.5 (107 - 63.3)     | 41 (51.5 - 32.6)     | 782.4 (958.2 - 638.7)    |
| Venezuela                        | 25786 (29851 - 21977)     | 9117 (10925 - 6366)   | 177648 (209597 - 133782)    | 3883 (5395 - 2582)      | 16.4 (22.8 - 10.9) | 110.4 (128.6 - 93.1)  | 47.6 (57.6 - 32.1)   | 779.2 (923.9 - 574.5)    |
| Vietnam                          | 127239 (147538 - 110341)  | 57659 (79896 - 44919) | 1085545 (1398783 - 832966)  | 18547 (25319 - 12691)   | 24.7 (34 - 17)     | 171 (198.9 - 147.1)   | 77.9 (108.3 - 60.5)  | 1408.6 (1850.6 - 1081.2) |
| Vanuatu                          | 230 (261 - 204)           | 133 (198 - 85)        | 3749 (5731 - 2348)          | 35 (48 - 23)            | 26.9 (37 - 17.6)   | 181.3 (207.1 - 159.6) | 112.6 (158.4 - 74.7) | 2451.1 (3677.7 - 1553.2) |
| Samoa                            | 199 (230 - 175)           | 78 (106 - 53)         | 1751 (2354 - 1216)          | 30 (42 - 19)            | 25.6 (35.7 - 16.7) | 172.5 (201.1 - 151.4) | 72 (98.5 - 48.6)     | 1416.8 (1896 - 985.2)    |
| Anhui                            | 39624 (46897 - 32882)     | 68089 (85848 - 57264) | 1141386 (1385792 - 955360)  | 5975 (8656 - 3937)      | 9 (13.1 - 5.9)     | 60 (71.3 - 49.9)      | 112.1 (142.5 - 94.5) | 1733.2 (2120.4 - 1450.8) |
| Sonora                           | 2656 (3119 - 2278)        | 639 (754 - 550)       | 12637 (14728 - 11126)       | 397 (562 - 260)         | 17.1 (24.3 - 11.3) | 116.1 (136.1 - 99.1)  | 32.5 (38.5 - 27.8)   | 559.8 (651.9 - 491.6)    |



|              |                          |                        |                             |                       |                    |                       |                       |                          |
|--------------|--------------------------|------------------------|-----------------------------|-----------------------|--------------------|-----------------------|-----------------------|--------------------------|
| Beijing      | 33641 (39389 - 28648)    | 7837 (10600 - 6344)    | 152704 (200936 - 124728)    | 5012 (6853 - 3354)    | 23 (31.6 - 15.4)   | 156.1 (183.8 - 132.6) | 40.1 (54.8 - 32.3)    | 676 (894.2 - 553.7)      |
| Tabasco      | 1830 (2102 - 1541)       | 502 (579 - 422)        | 9850 (11307 - 8676)         | 275 (376 - 187)       | 16.4 (22.7 - 11.3) | 110.8 (127.4 - 92.7)  | 37.5 (43.4 - 31)      | 617.4 (708.6 - 535.9)    |
| Guangdong    | 170044 (206430 - 139020) | 59519 (73088 - 50263)  | 1004669 (1185778 - 843949)  | 25160 (34749 - 16778) | 28.4 (39.5 - 18.9) | 194.5 (240.1 - 154.8) | 75.4 (93.6 - 63.7)    | 1145.2 (1365.3 - 962.2)  |
| Guangxi      | 49701 (60807 - 37305)    | 38831 (48397 - 32270)  | 723880 (891215 - 597446)    | 7447 (10811 - 4784)   | 16.1 (23.4 - 10.3) | 107.6 (132.1 - 80.4)  | 88.5 (110.7 - 73.8)   | 1543.4 (1907.1 - 1275.2) |
| Chongqing    | 66863 (81430 - 53104)    | 32700 (41794 - 26465)  | 558501 (698708 - 445874)    | 9934 (13971 - 6704)   | 27.9 (39.1 - 18.7) | 187.9 (227.8 - 149.2) | 100.3 (129 - 81.8)    | 1578.8 (1973.9 - 1268)   |
| Guizhou      | 55196 (66944 - 44847)    | 50626 (64793 - 39726)  | 1034719 (1333014 - 803860)  | 8257 (11579 - 5131)   | 24.8 (34.8 - 15.5) | 167.3 (203.3 - 135.9) | 167.5 (214.5 - 132.7) | 3029.1 (3900.3 - 2363.4) |
| Hebei        | 131039 (156859 - 107143) | 73646 (92426 - 61972)  | 1511665 (1845826 - 1257747) | 19479 (27215 - 12906) | 26.2 (36.6 - 17.3) | 177.8 (216.2 - 142.6) | 112.5 (142.4 - 95.4)  | 1963.2 (2423.3 - 1642.8) |
| Heilongjiang | 123168 (148346 - 98763)  | 34300 (43945 - 27274)  | 788107 (1005362 - 619058)   | 18464 (26030 - 12194) | 43.2 (60.7 - 28.4) | 291 (350.4 - 229.7)   | 90 (115.9 - 71.9)     | 1713.6 (2183.6 - 1363.6) |
| Henan        | 174436 (217207 - 141673) | 92106 (107496 - 77699) | 1783912 (2118732 - 1492556) | 26099 (37051 - 16999) | 28.7 (40.1 - 18.8) | 192.9 (239.9 - 156.3) | 112.8 (132 - 95.2)    | 1919.2 (2272.7 - 1610.8) |
| Hubei        | 119594 (144626 - 97507)  | 64683 (78345 - 54964)  | 1213618 (1445643 - 1026887) | 17675 (24515 - 11750) | 28.6 (39.8 - 19)   | 194.5 (236 - 158.1)   | 120.1 (147.1 - 102.5) | 1939 (2303.6 - 1645)     |

|          |                          |                        |                                |                       |                    |                       |                      |                          |
|----------|--------------------------|------------------------|--------------------------------|-----------------------|--------------------|-----------------------|----------------------|--------------------------|
| Hunan    | 187519 (241291 - 147582) | 57975 (87962 - 42701)  | 1035798<br>(1484027 - 793309)  | 28078 (41325 - 17626) | 38.7 (57.1 - 24.4) | 259.9 (333.7 - 204.9) | 87.2 (133.4 - 63.7)  | 1421.9 (2048.5 - 1083.4) |
| Jiangxi  | 37991 (44937 - 31511)    | 33026 (38659 - 27485)  | 612311 (724616 - 510257)       | 5695 (7999 - 3710)    | 13.9 (19.4 - 9.1)  | 93.3 (110.6 - 77.3)   | 91.9 (106.8 - 76.5)  | 1482.4 (1745.3 - 1234.7) |
| Jilin    | 67774 (83710 - 55361)    | 22875 (31120 - 17946)  | 507945 (669351 - 397060)       | 10134 (14193 - 6406)  | 33.7 (47.2 - 21.6) | 227.4 (281.5 - 184.8) | 84.9 (118.4 - 66.3)  | 1566.2 (2082.1 - 1238.2) |
| Shaanxi  | 80540 (96551 - 67044)    | 35426 (44429 - 28610)  | 707176 (888958 - 561950)       | 12111 (17156 - 8101)  | 31.6 (44.8 - 21.1) | 212.3 (252.9 - 175.7) | 111.1 (140.1 - 91.1) | 1826.5 (2271.5 - 1468.4) |
| Shandong | 146912 (198585 - 114092) | 82615 (103292 - 68952) | 1502246<br>(1828728 - 1248822) | 21915 (32232 - 14308) | 19.9 (29.4 - 12.9) | 134.2 (181.5 - 101.6) | 81.6 (102.6 - 68.5)  | 1349.8 (1652.9 - 1120.4) |
| Shanghai | 35680 (42308 - 29583)    | 8690 (14136 - 6320)    | 130763 (183181 - 100317)       | 5265 (7258 - 3528)    | 18 (24.8 - 12)     | 122.4 (146.4 - 101.1) | 30.6 (49.9 - 22.3)   | 450.3 (639.5 - 344.7)    |
| Shanxi   | 81396 (101608 - 62875)   | 26756 (34015 - 21124)  | 522540 (671396 - 406793)       | 12131 (17514 - 7809)  | 35 (49.7 - 22.6)   | 237.2 (294.9 - 182.9) | 92.9 (116.4 - 74.7)  | 1505.4 (1917 - 1187.7)   |
| Sichuan  | 117659 (143536 - 94179)  | 97075 (117270 - 80619) | 1616676<br>(2009540 - 1305800) | 17530 (24473 - 11494) | 18.4 (25.5 - 12.1) | 124.2 (151.8 - 99.5)  | 113.4 (136.7 - 95.2) | 1726.5 (2125.8 - 1401.6) |
| Tlaxcala | 1019 (1173 - 875)        | 257 (291 - 207)        | 4569 (5189 - 3893)             | 153 (210 - 104)       | 16.3 (22.4 - 11)   | 109.7 (127.2 - 94.2)  | 31.4 (35.8 - 25.3)   | 501.5 (569.3 - 425)      |
| Fujian   | 32577 (38890 - 26432)    | 29043 (36070 - 24454)  | 472657 (567027 - 393425)       | 4855 (6727 - 3236)    | 13.7 (19.2 - 9.1)  | 92.6 (111.8 - 74.2)   | 92.2 (115.6 - 77.8)  | 1370.9 (1650.4 - 1146.4) |

|                                 |                       |                       |                          |                     |                    |                       |                     |                          |
|---------------------------------|-----------------------|-----------------------|--------------------------|---------------------|--------------------|-----------------------|---------------------|--------------------------|
| Veracruz de Ignacio de la Llave | 7197 (8445 - 5975)    | 2475 (2964 - 2175)    | 45669 (54824 - 40803)    | 1081 (1508 - 708)   | 15.8 (22 - 10.4)   | 105.9 (125.2 - 87.6)  | 39.9 (47.7 - 34.9)  | 680 (815.1 - 607.2)      |
| Gansu                           | 50857 (62296 - 40421) | 20323 (24192 - 17333) | 433793 (518303 - 369525) | 7620 (10721 - 4941) | 31.1 (43.5 - 20.3) | 209.7 (253 - 167.4)   | 99.4 (117.9 - 85.5) | 1718.5 (2044.9 - 1473.2) |
| North East England              | 5243 (7355 - 3801)    | 1042 (1279 - 791)     | 13790 (16011 - 11032)    | 746 (1123 - 460)    | 18 (26.5 - 11.2)   | 124.2 (172.7 - 92)    | 20.9 (25.2 - 16)    | 328.2 (382.3 - 262)      |
| North West England              | 12197 (15804 - 9197)  | 2733 (3325 - 1959)    | 36269 (42395 - 28133)    | 1755 (2534 - 1108)  | 16.3 (23.5 - 10.3) | 111.5 (144.3 - 85.7)  | 21.1 (25.5 - 15.4)  | 329.8 (382.5 - 262.5)    |
| Yorkshire and the Humber        | 9952 (13460 - 7245)   | 1974 (2402 - 1375)    | 25500 (29662 - 19351)    | 1420 (2127 - 872)   | 17.7 (26.3 - 10.8) | 122.2 (164.1 - 89.7)  | 20.2 (24.1 - 14.3)  | 309 (358.2 - 239.7)      |
| East Midlands                   | 8238 (11242 - 6002)   | 1637 (2025 - 1193)    | 20612 (24295 - 16085)    | 1180 (1776 - 722)   | 16.6 (24.7 - 10.3) | 113.7 (151.4 - 84.7)  | 18.7 (23 - 13.8)    | 279.6 (326.4 - 222.4)    |
| West Midlands                   | 10358 (14460 - 6818)  | 2085 (2599 - 1496)    | 26265 (30990 - 20416)    | 1478 (2199 - 883)   | 17.3 (25.3 - 10.7) | 119.1 (160.6 - 82.8)  | 19.6 (23.9 - 14.4)  | 297.1 (346.6 - 233.6)    |
| East of England                 | 12088 (16435 - 8606)  | 2031 (2458 - 1545)    | 24077 (28221 - 19784)    | 1731 (2578 - 1016)  | 18.4 (27.3 - 10.8) | 126.2 (173.1 - 89.8)  | 16.8 (20.1 - 13)    | 242.9 (282.4 - 200.6)    |
| Greater London                  | 17509 (20467 - 14708) | 1854 (2299 - 1363)    | 26668 (31417 - 21167)    | 2515 (3461 - 1730)  | 26.5 (36.9 - 18.2) | 183.3 (216.2 - 154.5) | 17.5 (21.4 - 13)    | 276.5 (325.4 - 220.9)    |
| South East England              | 17486 (24377 - 12264) | 3032 (3748 - 2203)    | 35036 (41076 - 26982)    | 2507 (3832 - 1531)  | 18.3 (27.5 - 11.5) | 125.6 (169.7 - 90.3)  | 17.1 (20.8 - 12.6)  | 240.2 (278.3 - 189.8)    |

|                    |                        |                       |                            |                      |                    |                       |                     |                          |
|--------------------|------------------------|-----------------------|----------------------------|----------------------|--------------------|-----------------------|---------------------|--------------------------|
| South West England | 12231 (17555 - 8418)   | 2217 (2743 - 1557)    | 25037 (29605 - 19178)      | 1743 (2788 - 1014)   | 18.9 (29.6 - 11.1) | 130.3 (183.8 - 91.5)  | 18.1 (21.9 - 13.1)  | 256 (297.6 - 201.9)      |
| Wales              | 6944 (11445 - 4367)    | 1233 (1524 - 932)     | 16139 (19097 - 13019)      | 986 (1782 - 545)     | 19.4 (34.3 - 10.9) | 134.1 (214.5 - 89.7)  | 20 (24.4 - 15.4)    | 316.8 (367.2 - 260.2)    |
| Hainan             | 16044 (19979 - 12407)  | 5233 (6531 - 4085)    | 87738 (112890 - 69781)     | 2387 (3406 - 1524)   | 28.9 (41.4 - 18.3) | 195.1 (245.4 - 149)   | 66.7 (83.2 - 51.6)  | 1049.5 (1334.7 - 839.4)  |
| Zacatecas          | 1281 (1481 - 1084)     | 432 (494 - 361)       | 7694 (8805 - 6730)         | 192 (264 - 130)      | 15.7 (21.7 - 10.6) | 105.2 (122.4 - 88.2)  | 36.4 (41.6 - 30.3)  | 632.5 (723.7 - 551.6)    |
| Tamaulipas         | 3239 (3725 - 2811)     | 871 (1049 - 742)      | 17151 (20505 - 14913)      | 487 (665 - 330)      | 16.4 (22.4 - 11)   | 110.1 (127.7 - 94.5)  | 34.5 (41.8 - 29.4)  | 590.1 (705.1 - 512.5)    |
| Jiangsu            | 69297 (85659 - 54479)  | 67956 (99631 - 52896) | 1018105 (1391966 - 817499) | 10302 (14901 - 6681) | 10.8 (15.5 - 7)    | 72.8 (90 - 57.1)      | 78 (115.5 - 60.5)   | 1086.7 (1501.1 - 872.3)  |
| Yucatán            | 1846 (2152 - 1579)     | 538 (629 - 455)       | 9935 (11481 - 8701)        | 280 (385 - 187)      | 16.7 (23 - 11.1)   | 111 (130 - 94.5)      | 36.8 (43 - 30.8)    | 610.6 (702.8 - 533.6)    |
| Liaoning           | 98449 (116732 - 84099) | 40430 (51072 - 33755) | 828158 (1020780 - 686344)  | 14767 (20325 - 9858) | 26.7 (36.8 - 17.6) | 179.2 (212.3 - 153.6) | 79.7 (101.5 - 66.7) | 1448.5 (1770.2 - 1215.2) |
| Aguascalientes     | 958 (1122 - 792)       | 227 (268 - 195)       | 4350 (5106 - 3846)         | 144 (198 - 96)       | 16.3 (22.4 - 10.8) | 110 (130 - 89.4)      | 30.7 (36.3 - 26.2)  | 506.9 (594.8 - 448.1)    |
| Baja California    | 2890 (3375 - 2426)     | 757 (862 - 618)       | 16114 (18357 - 13616)      | 439 (615 - 298)      | 16.5 (23.1 - 11.3) | 110.8 (130.3 - 92.1)  | 37.2 (42.4 - 30.3)  | 631.8 (718.1 - 532.1)    |

|                     |                       |                       |                          |                    |                    |                      |                       |                        |
|---------------------|-----------------------|-----------------------|--------------------------|--------------------|--------------------|----------------------|-----------------------|------------------------|
| Baja California Sur | 507 (594 - 430)       | 106 (124 - 91)        | 2269 (2662 - 1969)       | 76 (106 - 52)      | 16.5 (22.9 - 11.2) | 111.8 (131.2 - 92.9) | 30.1 (35.3 - 25.4)    | 511.1 (597.1 - 441.2)  |
| Campeche            | 717 (842 - 603)       | 171 (201 - 141)       | 3406 (3981 - 2878)       | 108 (148 - 73)     | 16.4 (22.6 - 11.2) | 111 (131.8 - 93.1)   | 32.7 (38.5 - 26.9)    | 543.3 (635.3 - 458.5)  |
| Coahuila            | 2544 (2934 - 2185)    | 775 (905 - 673)       | 15661 (18299 - 13832)    | 383 (526 - 255)    | 16.4 (22.5 - 11)   | 110.5 (128.1 - 94.5) | 39.3 (45.9 - 33.8)    | 688.5 (799.9 - 610.2)  |
| Colima              | 594 (670 - 515)       | 163 (199 - 141)       | 3185 (3832 - 2775)       | 89 (120 - 60)      | 16 (21.8 - 10.9)   | 108 (123.1 - 92)     | 34.4 (42 - 29.6)      | 589.4 (709.7 - 513.6)  |
| Inner Mongolia      | 41903 (52159 - 33818) | 25678 (30429 - 21613) | 574121 (688019 - 479122) | 6294 (8960 - 4044) | 25.4 (36.4 - 16.4) | 171.7 (217.3 - 136)  | 120.6 (144.3 - 101.6) | 2179.1 (2594 - 1836.1) |
| Chiapas             | 3428 (3965 - 2954)    | 916 (1058 - 755)      | 19697 (22654 - 16701)    | 521 (706 - 352)    | 15.6 (21.3 - 10.6) | 104.2 (120.4 - 88.9) | 34.7 (40.4 - 28.2)    | 608.2 (701.4 - 513.9)  |
| Chihuahua           | 3377 (3900 - 2896)    | 961 (1153 - 825)      | 19596 (23559 - 16935)    | 507 (699 - 345)    | 15.8 (21.8 - 10.8) | 106.6 (123.6 - 89.7) | 34.8 (41.8 - 29.7)    | 625.5 (746 - 542.4)    |
| Distrito Federal    | 9955 (11631 - 8655)   | 2738 (3219 - 2366)    | 49981 (58848 - 44509)    | 1489 (2033 - 1003) | 16.8 (22.9 - 11.2) | 112.8 (132.3 - 97.6) | 33 (38.9 - 28.4)      | 571.4 (671.7 - 509.7)  |
| Durango             | 1374 (1568 - 1192)    | 359 (431 - 309)       | 6754 (7989 - 5886)       | 207 (286 - 139)    | 15.3 (21.2 - 10.3) | 102.7 (118 - 88.8)   | 29.5 (35.5 - 25.2)    | 511 (605.4 - 445.5)    |
| Guanajuato          | 4526 (5223 - 3881)    | 1233 (1447 - 1061)    | 23034 (27509 - 20576)    | 683 (942 - 458)    | 16.4 (22.9 - 11)   | 110.2 (128.9 - 93.9) | 33.6 (39.3 - 28.7)    | 567.1 (673.3 - 502.5)  |

|                     |                       |                    |                       |                    |                    |                      |                    |                       |
|---------------------|-----------------------|--------------------|-----------------------|--------------------|--------------------|----------------------|--------------------|-----------------------|
| Guerrero            | 2770 (3222 - 2357)    | 1055 (1231 - 881)  | 19606 (23143 - 16862) | 415 (581 - 275)    | 15.6 (22 - 10.3)   | 105 (123 - 88.6)     | 42.5 (49.5 - 35.4) | 743.7 (876.5 - 637.8) |
| Hidalgo             | 2266 (2717 - 1952)    | 707 (820 - 589)    | 12982 (15000 - 11047) | 341 (471 - 226)    | 15.8 (22 - 10.6)   | 106.3 (128.7 - 91.1) | 36.8 (42.7 - 30.5) | 617.2 (713.9 - 525.6) |
| Jalisco             | 6796 (7882 - 5719)    | 1848 (2154 - 1564) | 34255 (39617 - 30074) | 1020 (1407 - 680)  | 16.7 (23.1 - 11.2) | 112 (131 - 93.7)     | 33.4 (38.8 - 28.1) | 569.9 (658.1 - 495.8) |
| México              | 14080 (16787 - 11915) | 3268 (3830 - 2855) | 66951 (79819 - 59662) | 2149 (3034 - 1420) | 16.5 (23.2 - 11)   | 109.8 (132 - 93.2)   | 31.9 (37.1 - 27.2) | 537.9 (634.8 - 475.2) |
| Michoacán de Ocampo | 3845 (4440 - 3395)    | 1064 (1258 - 906)  | 18692 (22072 - 16398) | 575 (778 - 395)    | 15.9 (21.5 - 10.9) | 107 (123.9 - 94.3)   | 30.6 (36.2 - 26.1) | 520.8 (613.6 - 455.8) |
| Morelos             | 1751 (2011 - 1473)    | 458 (547 - 396)    | 8405 (10095 - 7332)   | 262 (361 - 175)    | 16.1 (22.1 - 10.7) | 108.4 (124.6 - 91.3) | 31.3 (37.3 - 27)   | 528.9 (633 - 462.7)   |
| Nayarit             | 1016 (1206 - 885)     | 273 (322 - 232)    | 4744 (5521 - 4098)    | 152 (207 - 101)    | 16.5 (22.6 - 11.1) | 111.4 (132.9 - 96.3) | 32.2 (38 - 27.4)   | 526.1 (610.6 - 455.2) |
| Nuevo León          | 4527 (5212 - 3767)    | 1234 (1449 - 1077) | 24150 (28511 - 21319) | 682 (955 - 460)    | 16.7 (23.2 - 11.2) | 111.8 (129.8 - 92.2) | 36.3 (42.8 - 31.3) | 610.3 (714.7 - 536.8) |
| Oaxaca              | 3381 (4001 - 2917)    | 1115 (1292 - 872)  | 18801 (21311 - 15428) | 508 (701 - 339)    | 15.7 (21.7 - 10.5) | 104.8 (125.2 - 90.2) | 35.4 (41 - 27.8)   | 582.4 (660.3 - 477.8) |
| Puebla              | 4983 (5665 - 4042)    | 1476 (1686 - 1184) | 27048 (30496 - 22744) | 750 (1033 - 505)   | 15.7 (21.6 - 10.5) | 105.1 (120 - 84.3)   | 33.8 (38.6 - 27)   | 571.7 (644.7 - 477.6) |

|                  |                       |                    |                          |                    |                    |                       |                       |                          |
|------------------|-----------------------|--------------------|--------------------------|--------------------|--------------------|-----------------------|-----------------------|--------------------------|
| Querétaro        | 1430 (1659 - 1223)    | 386 (445 - 331)    | 7528 (8697 - 6629)       | 216 (300 - 145)    | 15.9 (22.2 - 10.9) | 107 (125 - 90.3)      | 35.6 (41.1 - 30.1)    | 588.2 (679.7 - 519.4)    |
| Quintana Roo     | 966 (1143 - 824)      | 179 (206 - 150)    | 4309 (4977 - 3735)       | 147 (207 - 100)    | 16.7 (23.3 - 11.4) | 112.7 (135.2 - 95.2)  | 31.6 (36.6 - 26)      | 530 (607 - 455.6)        |
| San Luis Potosí  | 2196 (2559 - 1855)    | 676 (804 - 571)    | 11628 (13585 - 10250)    | 330 (460 - 216)    | 15.5 (21.7 - 10.1) | 103.9 (121.8 - 86.9)  | 34.1 (40.6 - 28.8)    | 555.7 (651 - 488.9)      |
| Sinaloa          | 2775 (3328 - 2305)    | 641 (747 - 540)    | 11329 (13096 - 9767)     | 415 (573 - 275)    | 16.6 (23 - 11)     | 112.2 (135.2 - 92.3)  | 29.8 (34.8 - 24.8)    | 472.3 (547.1 - 407.9)    |
| Ningxia          | 10441 (12302 - 8646)  | 3409 (4234 - 2733) | 73370 (92410 - 57659)    | 1578 (2225 - 1070) | 30.2 (42.3 - 20.7) | 203 (240.1 - 168.6)   | 81.2 (99.5 - 65.4)    | 1374 (1714.9 - 1100.5)   |
| Northern Ireland | 2985 (4159 - 1848)    | 632 (765 - 466)    | 8666 (10020 - 6811)      | 429 (663 - 238)    | 17.2 (26.5 - 9.7)  | 118.7 (162.8 - 75.2)  | 21.9 (26.3 - 16.3)    | 338.4 (390 - 269)        |
| Qinghai          | 8640 (9923 - 7201)    | 5653 (6875 - 4599) | 130803 (161663 - 104814) | 1312 (1836 - 879)  | 28.9 (40.3 - 19.5) | 193 (225.2 - 161.8)   | 148.1 (176.5 - 121.8) | 2705.7 (3298.5 - 2193.2) |
| Scotland         | 8609 (10584 - 6259)   | 2407 (3001 - 1763) | 31761 (37920 - 25316)    | 1232 (1772 - 743)  | 15.1 (21.5 - 9.2)  | 103.7 (125.8 - 75.8)  | 24.6 (30.4 - 18.5)    | 374.8 (442 - 303.1)      |
| Tianjin          | 37034 (44596 - 29886) | 6362 (9238 - 4896) | 128006 (174086 - 99349)  | 5568 (7774 - 3683) | 38.2 (54.2 - 25)   | 257.1 (314.1 - 203.4) | 50 (74 - 38.4)        | 857.3 (1187 - 667.8)     |
| Tibet            | 5018 (5693 - 4315)    | 3601 (4207 - 3017) | 82851 (98135 - 68898)    | 750 (1031 - 508)   | 39.1 (53.8 - 26.3) | 266.3 (304.8 - 223.5) | 217.9 (251 - 181.4)   | 3965.5 (4649.1 - 3316.1) |

|              |                          |                       |                          |                       |                    |                       |                      |                          |
|--------------|--------------------------|-----------------------|--------------------------|-----------------------|--------------------|-----------------------|----------------------|--------------------------|
| Xinjiang     | 39147 (48438 - 32579)    | 18315 (21966 - 15454) | 435440 (523404 - 365295) | 5904 (8261 - 3919)    | 33.4 (46.9 - 21.9) | 224.9 (280.5 - 181.6) | 119.1 (141 - 99.4)   | 2252.5 (2702.5 - 1904.4) |
| Yunnan       | 105990 (129565 - 88877)  | 33451 (40822 - 28497) | 679308 (818345 - 575372) | 15918 (22413 - 10661) | 38.8 (55.5 - 26)   | 260.8 (323.8 - 216.4) | 91.1 (113.2 - 77.8)  | 1610.2 (1935.4 - 1369.2) |
| Zhejiang     | 121277 (153500 - 101499) | 35072 (46799 - 28498) | 497247 (624400 - 409913) | 17886 (25428 - 11893) | 29.3 (42.1 - 19.5) | 200.2 (253.6 - 166.2) | 63.6 (85.2 - 51.5)   | 842.1 (1068.5 - 691.8)   |
| Yemen        | 926 (1188 - 706)         | 8718 (13697 - 5326)   | 266753 (425141 - 163188) | 157 (232 - 99)        | 1.3 (1.9 - 0.8)    | 7.4 (9.5 - 5.6)       | 102.6 (157.4 - 65.1) | 2130.5 (3407.2 - 1283.9) |
| South Africa | 12353 (14795 - 10197)    | 17199 (20979 - 14370) | 312601 (378104 - 259044) | 1911 (2694 - 1301)    | 4.6 (6.5 - 3.1)    | 30.2 (36.4 - 24.8)    | 52.6 (64 - 43.9)     | 868.7 (1054.5 - 723.3)   |
| Zambia       | 1020 (1261 - 803)        | 3537 (4668 - 2817)    | 79964 (103724 - 64669)   | 171 (247 - 112)       | 2.3 (3.2 - 1.5)    | 13.5 (16.8 - 10.9)    | 89.3 (120.5 - 68.3)  | 1593.1 (2117.1 - 1274.3) |
| Zimbabwe     | 2177 (2641 - 1836)       | 3659 (4731 - 2589)    | 124498 (158842 - 83330)  | 335 (468 - 224)       | 4.5 (6.4 - 2.9)    | 30 (36.7 - 24.8)      | 53 (70.7 - 37.7)     | 1237.8 (1623.8 - 896.4)  |
